# Supplementary material for: Potential pharmacological mechanisms of four active compounds of Macleaya cordata extract against enteritis based on network pharmacology and molecular docking technology
Source: Frontiers journal article supplement (doi:10.3389/fphys.2023.1175227), 2023-05-02
Supplement: Image_1.pdf [file Image_1.pdf]

## *Supplementary Material*

### **Potential pharmacological mechanisms of four active compounds of *Macleaya cordata* extract against enteritis based on network pharmacology and molecular docking technology**

Pingrui Yang<sup>1,†</sup>, Chonghua Zhong<sup>2,3,†</sup>, Huan Huang<sup>1</sup>, Xifeng Li<sup>1</sup>, Lin Du<sup>1</sup>, Lifang Zhang<sup>1</sup>, Shicheng Bi<sup>1,4</sup>, Hongxu Du<sup>1,4</sup>, Qi Ma<sup>1,4</sup> and Liting Cao<sup>1,4\*</sup>

\* Correspondence: Corresponding Author: (L.T. Cao) [caoliting@swu.edu.cn](mailto:caoliting@swu.edu.cn)

#### **1 Supplementary Figures**

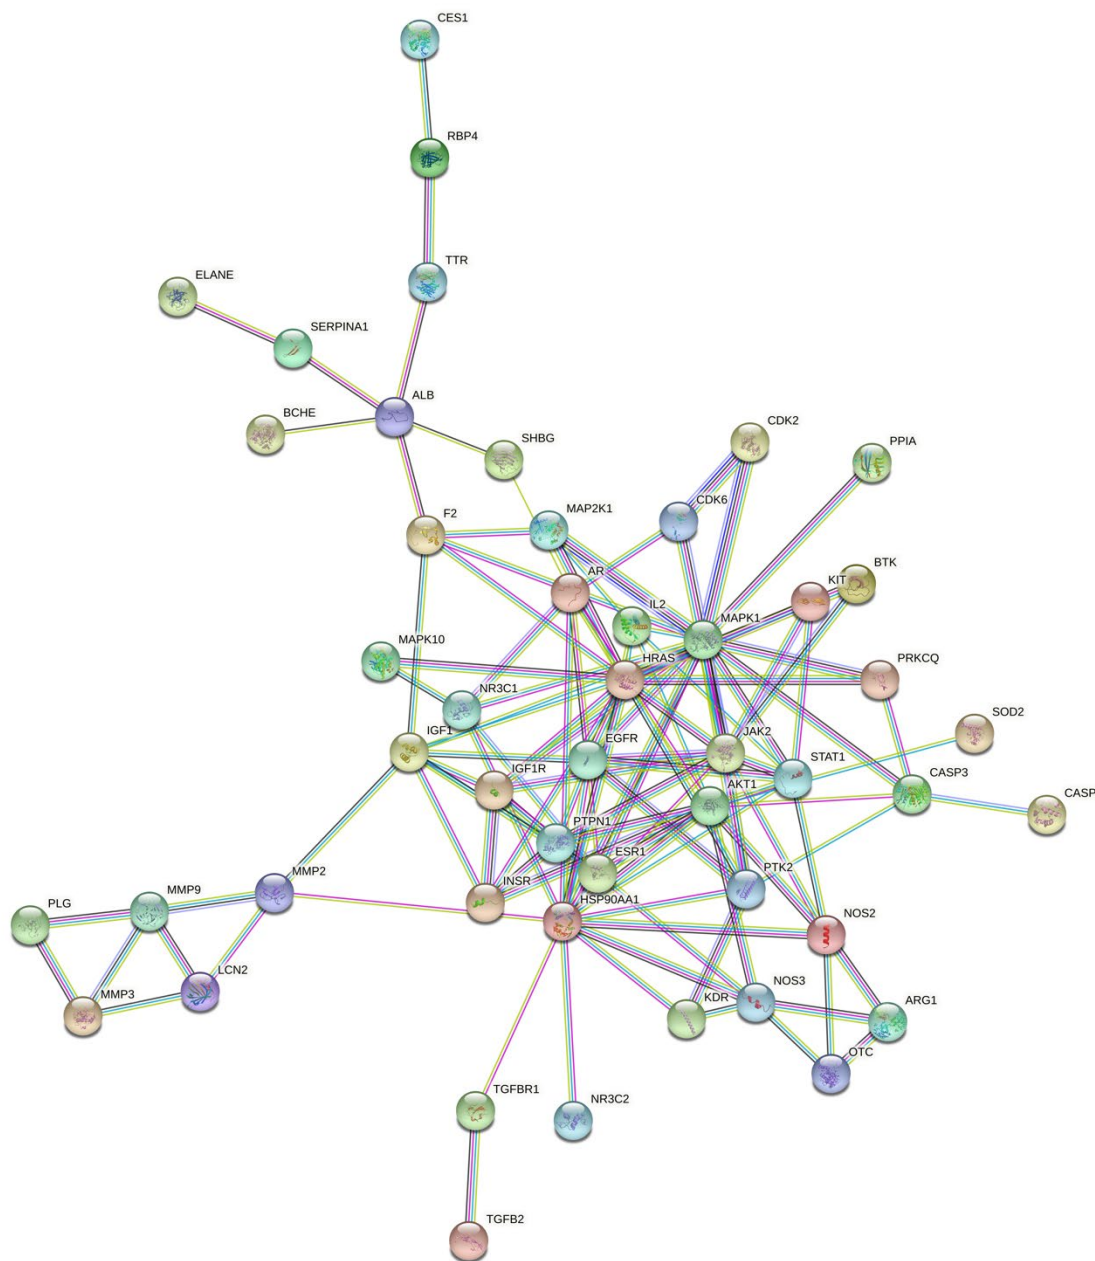

**Supplementary Figure S1.** Protein-protein interaction (PPI) network constructed by STRING. It represents the interaction target of active compounds and enteritis.
