# Supplementary material for: Potential pharmacological mechanisms of four active compounds of Macleaya cordata extract against enteritis based on network pharmacology and molecular docking technology
Source: Front Physiol. 2023 May 2;14:1175227. doi: 10.3389/fphys.2023.1175227 (PMC10185776; doi:10.3389/fphys.2023.1175227)
Supplement: Supplementary file 1 [file Table2.XLSX]

## Sheet: 1237 targets of enteritis
Gene Symbol	Description	Relevance score
ACTG2	Actin Gamma 2, Smooth Muscle	21.6805
RET	Ret Proto-Oncogene	16.7343
EDNRB	Endothelin Receptor Type B	15.524
EDN3	Endothelin 3	15.0061
SOX10	SRY-Box Transcription Factor 10	14.736
NOD2	Nucleotide Binding Oligomerization Domain Containing 2	14.068
GDNF	Glial Cell Derived Neurotrophic Factor	14.0396
IL6	Interleukin 6	12.1435
TTC37	Tetratricopeptide Repeat Domain 37	11.6897
TTR	Transthyretin	11.0601
PLA2G4A	Phospholipase A2 Group IVA	10.6243
ALB	Albumin	10.388
PRKCQ	Protein Kinase C Theta	10.1235
ERBB2	Erb-B2 Receptor Tyrosine Kinase 2	9.14863
SKIV2L	Ski2 Like RNA Helicase	9.116
ECE1	Endothelin Converting Enzyme 1	9.09507
ERBB3	Erb-B2 Receptor Tyrosine Kinase 3	8.85739
NRTN	Neurturin	8.60383
ABCD1	ATP Binding Cassette Subfamily D Member 1	8.42488
SMO	Smoothened, Frizzled Class Receptor	8.38591
SREBF1	Sterol Regulatory Element Binding Transcription Factor 1	8.27141
TNF	Tumor Necrosis Factor	8.00944
SEMA3C	Semaphorin 3C	7.83635
SEMA3D	Semaphorin 3D	7.83635
ATP7A	ATPase Copper Transporting Alpha	7.7844
CRP	C-Reactive Protein	7.59248
HSCR5	Hirschsprung Disease, Susceptibility To, 5	7.08673
ZEB2	Zinc Finger E-Box Binding Homeobox 2	6.82672
AGK	Acylglycerol Kinase	6.72887
CXCL8	C-X-C Motif Chemokine Ligand 8	6.3618
IL1B	Interleukin 1 Beta	6.3583
PHOX2B	Paired Like Homeobox 2B	6.27538
VIP	Vasoactive Intestinal Peptide	6.23258
TLX2	T Cell Leukemia Homeobox 2	6.22573
CD79A	CD79a Molecule	6.03964
KIF26A	Kinesin Family Member 26A	6.01584
HSCR8	Hirschsprung Disease Modifier 2	5.89682
HSCR6	Hirschsprung Disease, Short-Segment, 2	5.89682
HSCR7	Hirschsprung Disease, Short-Segment, 3	5.89682
HSCR9	Hirschsprung Disease, Susceptibility To, 9	5.89682
IFNG	Interferon Gamma	5.78071
S100B	S100 Calcium Binding Protein B	5.74705
TF	Transferrin	5.73833
IL2	Interleukin 2	5.68522
GCG	Glucagon	5.68363
IL10	Interleukin 10	5.6675
DEFA6	Defensin Alpha 6	5.6375
GAL	Galanin And GMAP Prepropeptide	5.48883
BBS1	Bardet-Biedl Syndrome 1	5.46464
CCR5	C-C Motif Chemokine Receptor 5	5.44348
KIT	KIT Proto-Oncogene, Receptor Tyrosine Kinase	5.42602
CCK	Cholecystokinin	5.31929
CD4	CD4 Molecule	5.24878
IL2RA	Interleukin 2 Receptor Subunit Alpha	5.24528
DEFA5	Defensin Alpha 5	5.24215
INS	Insulin	5.19852
MITF	Melanocyte Inducing Transcription Factor	5.15202
IL10RA	Interleukin 10 Receptor Subunit Alpha	5.0752
TLR4	Toll Like Receptor 4	5.06377
NPY	Neuropeptide Y	5.03571
KIFBP	Kinesin Family Binding Protein	5.00815
FLNA	Filamin A	4.84515
FOXF1	Forkhead Box F1	4.73769
L1CAM	L1 Cell Adhesion Molecule	4.70501
GAST	Gastrin	4.62896
SST	Somatostatin	4.57329
TP53	Tumor Protein P53	4.56198
TLR5	Toll Like Receptor 5	4.52731
IL4	Interleukin 4	4.52301
NEUROG3	Neurogenin 3	4.4309
POLR2F	RNA Polymerase II, I And III Subunit F	4.39496
PHACTR4	Phosphatase And Actin Regulator 4	4.36568
MYH11	Myosin Heavy Chain 11	4.32495
PYY	Peptide YY	4.30876
PAX3	Paired Box 3	4.30108
NOS1	Nitric Oxide Synthase 1	4.27967
MPO	Myeloperoxidase	4.2497
IL18	Interleukin 18	4.24186
CALCA	Calcitonin Related Polypeptide Alpha	4.23879
TYR	Tyrosinase	4.21944
BDNF	Brain Derived Neurotrophic Factor	4.20031
ICOS	Inducible T Cell Costimulator	4.19326
HLA-DQB1	Major Histocompatibility Complex, Class II, DQ Beta 1	4.17006
LTF	Lactotransferrin	4.11964
CCL2	C-C Motif Chemokine Ligand 2	4.11168
TLR2	Toll Like Receptor 2	4.10283
CSF3	Colony Stimulating Factor 3	4.06403
SNCA	Synuclein Alpha	4.05722
KITLG	KIT Ligand	4.03634
SNAI2	Snail Family Transcriptional Repressor 2	4.01333
ASCL1	Achaete-Scute Family BHLH Transcription Factor 1	4.00699
TGFB1	Transforming Growth Factor Beta 1	4.00458
ICAM1	Intercellular Adhesion Molecule 1	3.92482
TH	Tyrosine Hydroxylase	3.91156
CTLA4	Cytotoxic T-Lymphocyte Associated Protein 4	3.87922
IL17A	Interleukin 17A	3.8406
IL5	Interleukin 5	3.83367
STX3	Syntaxin 3	3.82959
TTC7A	Tetratricopeptide Repeat Domain 7A	3.82687
HLA-DRB1	Major Histocompatibility Complex, Class II, DR Beta 1	3.80832
SYP	Synaptophysin	3.7757
IGF1	Insulin Like Growth Factor 1	3.74371
GFAP	Glial Fibrillary Acidic Protein	3.68572
JAK1	Janus Kinase 1	3.68435
LMNA	Lamin A/C	3.67408
CDK4	Cyclin Dependent Kinase 4	3.66929
PIGV	Phosphatidylinositol Glycan Anchor Biosynthesis Class V	3.66428
HP	Haptoglobin	3.64357
COL2A1	Collagen Type II Alpha 1 Chain	3.63734
THBD	Thrombomodulin	3.63269
NFKB2	Nuclear Factor Kappa B Subunit 2	3.63015
LMOD1	Leiomodin 1	3.62668
PPARG	Peroxisome Proliferator Activated Receptor Gamma	3.59957
NSD1	Nuclear Receptor Binding SET Domain Protein 1	3.58588
CEP290	Centrosomal Protein 290	3.58588
TLR8	Toll Like Receptor 8	3.57835
BLVRB	Biliverdin Reductase B	3.56236
MYLK	Myosin Light Chain Kinase	3.55345
CSF2	Colony Stimulating Factor 2	3.55084
SGO1	Shugoshin 1	3.53806
IFNA1	Interferon Alpha 1	3.53331
CCR6	C-C Motif Chemokine Receptor 6	3.53065
STAT1	Signal Transducer And Activator Of Transcription 1	3.51916
NDE1	NudE Neurodevelopment Protein 1	3.51345
AHI1	Abelson Helper Integration Site 1	3.50543
CC2D2A	Coiled-Coil And C2 Domain Containing 2A	3.50543
PROK1	Prokineticin 1	3.48967
BTK	Bruton Tyrosine Kinase	3.4719
TLR8-AS1	TLR8 Antisense RNA 1	3.46174
IL13	Interleukin 13	3.45362
MLN	Motilin	3.45296
MT-CO1	Mitochondrially Encoded Cytochrome C Oxidase I	3.44857
FOXP3	Forkhead Box P3	3.42565
ACHE	Acetylcholinesterase (Cartwright Blood Group)	3.41874
CHAT	Choline O-Acetyltransferase	3.41549
CHD7	Chromodomain Helicase DNA Binding Protein 7	3.40094
IL1A	Interleukin 1 Alpha	3.3701
ABCB1	ATP Binding Cassette Subfamily B Member 1	3.36228
SOX8	SRY-Box Transcription Factor 8	3.35643
CD19	CD19 Molecule	3.35083
KRAS	KRAS Proto-Oncogene, GTPase	3.32464
CLMP	CXADR Like Membrane Protein	3.31906
TRPV4	Transient Receptor Potential Cation Channel Subfamily V Member 4	3.31589
NOD1	Nucleotide Binding Oligomerization Domain Containing 1	3.29206
SYCP2	Synaptonemal Complex Protein 2	3.28781
CALB2	Calbindin 2	3.27574
LACTB	Lactamase Beta	3.27132
TAC1	Tachykinin Precursor 1	3.2368
HOXB5	Homeobox B5	3.21359
MPZ	Myelin Protein Zero	3.20824
NTS	Neurotensin	3.1927
PMP22	Peripheral Myelin Protein 22	3.18376
TYMP	Thymidine Phosphorylase	3.16927
HAND2	Heart And Neural Crest Derivatives Expressed 2	3.13366
PTGS2	Prostaglandin-Endoperoxide Synthase 2	3.12876
FOXO3	Forkhead Box O3	3.12794
IRF3	Interferon Regulatory Factor 3	3.12679
NTRK3	Neurotrophic Receptor Tyrosine Kinase 3	3.11433
SLC22A5	Solute Carrier Family 22 Member 5	3.1134
MBTPS2	Membrane Bound Transcription Factor Peptidase, Site 2	3.11339
ADCYAP1	Adenylate Cyclase Activating Polypeptide 1	3.09677
RAD21	RAD21 Cohesin Complex Component	3.0809
CD46	CD46 Molecule	3.08004
DEFB4A	Defensin Beta 4A	3.0459
SLC17A5	Solute Carrier Family 17 Member 5	3.04445
IL3	Interleukin 3	3.03771
ERCC2	ERCC Excision Repair 2, TFIIH Core Complex Helicase Subunit	3.01858
LEP	Leptin	3.00394
EGF	Epidermal Growth Factor	3.00196
RMRP	RNA Component Of Mitochondrial RNA Processing Endoribonuclease	2.99678
SOD1	Superoxide Dismutase 1	2.9827
SLC2A2	Solute Carrier Family 2 Member 2	2.97289
VDR	Vitamin D Receptor	2.96949
IL12B	Interleukin 12B	2.94795
ENO2	Enolase 2	2.94121
COMT	Catechol-O-Methyltransferase	2.94044
LOC112042785	Sharpr-MPRA Regulatory Region 9139	2.9224
PIGO	Phosphatidylinositol Glycan Anchor Biosynthesis Class O	2.91633
LRRK2	Leucine Rich Repeat Kinase 2	2.90631
GPT	Glutamic--Pyruvic Transaminase	2.89932
GLI3	GLI Family Zinc Finger 3	2.89885
NLRP6	NLR Family Pyrin Domain Containing 6	2.89211
IL1RN	Interleukin 1 Receptor Antagonist	2.8893
RBP4	Retinol Binding Protein 4	2.87682
ARX	Aristaless Related Homeobox	2.86431
ENPP1	Ectonucleotide Pyrophosphatase/Phosphodiesterase 1	2.83277
ANKRD11	Ankyrin Repeat Domain Containing 11	2.83174
NFKBIA	NFKB Inhibitor Alpha	2.82906
ELANE	Elastase, Neutrophil Expressed	2.82445
TPMT	Thiopurine S-Methyltransferase	2.81779
PRNP	Prion Protein	2.81702
FBN1	Fibrillin 1	2.81667
MT-ND1	Mitochondrially Encoded NADH:Ubiquinone Oxidoreductase Core Subunit 1	2.80821
CFTR	CF Transmembrane Conductance Regulator	2.80737
IL22	Interleukin 22	2.80474
STAT3	Signal Transducer And Activator Of Transcription 3	2.78023
AOC1	Amine Oxidase Copper Containing 1	2.77353
QSOX1	Quiescin Sulfhydryl Oxidase 1	2.77311
CTSD	Cathepsin D	2.77048
MMP9	Matrix Metallopeptidase 9	2.76869
GJB1	Gap Junction Protein Beta 1	2.76319
SGO1-AS1	SGO1 Antisense RNA 1	2.75106
BMP4	Bone Morphogenetic Protein 4	2.73947
ITGAX	Integrin Subunit Alpha X	2.7383
GRIA1	Glutamate Ionotropic Receptor AMPA Type Subunit 1	2.72935
GUCY2D	Guanylate Cyclase 2D, Retinal	2.71709
GRIA3	Glutamate Ionotropic Receptor AMPA Type Subunit 3	2.71105
CR2	Complement C3d Receptor 2	2.70714
EDNRA	Endothelin Receptor Type A	2.70671
PTPN1	Protein Tyrosine Phosphatase Non-Receptor Type 1	2.70659
PTEN	Phosphatase And Tensin Homolog	2.68447
AKT1	AKT Serine/Threonine Kinase 1	2.67861
CSN1S1	Casein Alpha S1	2.67315
NKX2-1	NK2 Homeobox 1	2.66766
IGFBP3	Insulin Like Growth Factor Binding Protein 3	2.6655
NTRK1	Neurotrophic Receptor Tyrosine Kinase 1	2.65975
MADCAM1	Mucosal Vascular Addressin Cell Adhesion Molecule 1	2.65621
TLR9	Toll Like Receptor 9	2.64663
TFRC	Transferrin Receptor	2.64616
GFRA1	GDNF Family Receptor Alpha 1	2.63884
USP8	Ubiquitin Specific Peptidase 8	2.63248
NR5A1	Nuclear Receptor Subfamily 5 Group A Member 1	2.6293
CEACAM6	CEA Cell Adhesion Molecule 6	2.61566
FANCD2	FA Complementation Group D2	2.61198
CASP1	Caspase 1	2.61144
MT-CYB	Mitochondrially Encoded Cytochrome B	2.59678
IGHMBP2	Immunoglobulin Mu DNA Binding Protein 2	2.5873
CARD9	Caspase Recruitment Domain Family Member 9	2.5839
BRCA2	BRCA2 DNA Repair Associated	2.57612
CD40	CD40 Molecule	2.57182
TMEM237	Transmembrane Protein 237	2.57177
ZCCHC8	Zinc Finger CCHC-Type Containing 8	2.56582
IRS1	Insulin Receptor Substrate 1	2.56204
LEPQTL1	Leptin, Serum Levels Of	2.56034
SUFU	SUFU Negative Regulator Of Hedgehog Signaling	2.55508
CP	Ceruloplasmin	2.5394
IGH	Immunoglobulin Heavy Locus	2.53028
MCM3AP	Minichromosome Maintenance Complex Component 3 Associated Protein	2.5267
IL23A	Interleukin 23 Subunit Alpha	2.52189
PDHA2	Pyruvate Dehydrogenase E1 Subunit Alpha 2	2.51553
TEX15	Testis Expressed 15, Meiosis And Synapsis Associated	2.51553
MT-ATP6	Mitochondrially Encoded ATP Synthase Membrane Subunit 6	2.51553
CALB1	Calbindin 1	2.50556
IL33	Interleukin 33	2.5054
IGHM	Immunoglobulin Heavy Constant Mu	2.50471
SHH	Sonic Hedgehog Signaling Molecule	2.49653
C3	Complement C3	2.48734
SLC22A4	Solute Carrier Family 22 Member 4	2.48631
GHRL	Ghrelin And Obestatin Prepropeptide	2.48037
CCL11	C-C Motif Chemokine Ligand 11	2.47384
FANCI	FA Complementation Group I	2.47263
CD79B	CD79b Molecule	2.47138
SELENBP1	Selenium Binding Protein 1	2.47057
TNFRSF1A	TNF Receptor Superfamily Member 1A	2.46938
SMAD3	SMAD Family Member 3	2.46021
NLGN1	Neuroligin 1	2.45172
SLC2A4	Solute Carrier Family 2 Member 4	2.44563
JAK2	Janus Kinase 2	2.43959
ERCC4	ERCC Excision Repair 4, Endonuclease Catalytic Subunit	2.43145
MMP1	Matrix Metallopeptidase 1	2.43083
EPO	Erythropoietin	2.4281
MAPK8IP1	Mitogen-Activated Protein Kinase 8 Interacting Protein 1	2.4214
APOE	Apolipoprotein E	2.41852
CREBBP	CREB Binding Protein	2.41522
IL23R	Interleukin 23 Receptor	2.41479
MIR122	MicroRNA 122	2.40689
HMOX2	Heme Oxygenase 2	2.40342
HECW2	HECT, C2 And WW Domain Containing E3 Ubiquitin Protein Ligase 2	2.402
SCN9A	Sodium Voltage-Gated Channel Alpha Subunit 9	2.3915
TNFRSF13B	TNF Receptor Superfamily Member 13B	2.39093
TNFRSF13C	TNF Receptor Superfamily Member 13C	2.39093
MNX1	Motor Neuron And Pancreas Homeobox 1	2.39093
MPLKIP	M-Phase Specific PLK1 Interacting Protein	2.39093
MNX1-AS2	MNX1 Antisense RNA 2	2.39093
GH-LCR	Growth Hormone Locus Control Region	2.39093
LOC111721705	Skeletal Muscle Cis-Regulatory Module Overlapping ZEB2	2.39093
IBD3	Inflammatory Bowel Disease 3	2.39093
AKT2	AKT Serine/Threonine Kinase 2	2.38808
FENDRR	FOXF1 Adjacent Non-Coding Developmental Regulatory RNA	2.38808
EP300	E1A Binding Protein P300	2.38672
VLDLR	Very Low Density Lipoprotein Receptor	2.36978
NEUROD1	Neuronal Differentiation 1	2.36102
BCL2	BCL2 Apoptosis Regulator	2.36086
RNASE3	Ribonuclease A Family Member 3	2.3602
NLRP3	NLR Family Pyrin Domain Containing 3	2.35289
MMACHC	Metabolism Of Cobalamin Associated C	2.33663
NGFR	Nerve Growth Factor Receptor	2.33031
DBH	Dopamine Beta-Hydroxylase	2.32342
CEMIP2	Cell Migration Inducing Hyaluronidase 2	2.31104
MIR21	MicroRNA 21	2.30781
PRMT7	Protein Arginine Methyltransferase 7	2.30763
LINC01082	Long Intergenic Non-Protein Coding RNA 1082	2.30763
EPCAM	Epithelial Cell Adhesion Molecule	2.30047
DHCR7	7-Dehydrocholesterol Reductase	2.29933
LCN2	Lipocalin 2	2.29172
NOG	Noggin	2.28202
SOX9	SRY-Box Transcription Factor 9	2.28202
BBS2	Bardet-Biedl Syndrome 2	2.27884
CYP3A4	Cytochrome P450 Family 3 Subfamily A Member 4	2.27749
TBK1	TANK Binding Kinase 1	2.27542
RETN	Resistin	2.27485
TGFBR2	Transforming Growth Factor Beta Receptor 2	2.2642
FCGR3A	Fc Gamma Receptor IIIa	2.26091
APC2	APC Regulator Of WNT Signaling Pathway 2	2.25898
ICOSLG	Inducible T Cell Costimulator Ligand	2.25653
ARVCF	ARVCF Delta Catenin Family Member	2.25556
MYO1H	Myosin IH	2.25556
UFD1	Ubiquitin Recognition Factor In ER Associated Degradation 1	2.25556
BRIP1	BRCA1 Interacting Helicase 1	2.25432
LY6E	Lymphocyte Antigen 6 Family Member E	2.24985
GRP	Gastrin Releasing Peptide	2.24975
GRIK1	Glutamate Ionotropic Receptor Kainate Type Subunit 1	2.2423
SOCS3	Suppressor Of Cytokine Signaling 3	2.2413
PHOX2A	Paired Like Homeobox 2A	2.23862
UCHL1	Ubiquitin C-Terminal Hydrolase L1	2.23805
TNFRSF1B	TNF Receptor Superfamily Member 1B	2.23497
EGFR	Epidermal Growth Factor Receptor	2.23135
PDE6B	Phosphodiesterase 6B	2.22594
MIR214	MicroRNA 214	2.22594
MIR29C	MicroRNA 29c	2.22594
GATA1	GATA Binding Protein 1	2.22002
ACTG1P4	Actin Gamma 1 Pseudogene 4	2.21278
PROM1	Prominin 1	2.20873
MIR29A	MicroRNA 29a	2.20873
TCP1	T-Complex 1	2.20805
MYC	MYC Proto-Oncogene, BHLH Transcription Factor	2.20414
TMEM100	Transmembrane Protein 100	2.20092
BRCA1	BRCA1 DNA Repair Associated	2.19578
IL1R1	Interleukin 1 Receptor Type 1	2.19455
PTPN2	Protein Tyrosine Phosphatase Non-Receptor Type 2	2.19391
TYK2	Tyrosine Kinase 2	2.19323
SETD2	SET Domain Containing 2, Histone Lysine Methyltransferase	2.18223
ANPEP	Alanyl Aminopeptidase, Membrane	2.17919
CFH	Complement Factor H	2.17541
EDNRB-AS1	EDNRB Antisense RNA 1	2.17541
FANCA	FA Complementation Group A	2.17387
NPHP1	Nephrocystin 1	2.17387
FANCB	FA Complementation Group B	2.17387
MKKS	MKKS Centrosomal Shuttling Protein	2.17387
GAPDH	Glyceraldehyde-3-Phosphate Dehydrogenase	2.17367
HGF	Hepatocyte Growth Factor	2.16853
HTR3A	5-Hydroxytryptamine Receptor 3A	2.16591
KRT7	Keratin 7	2.15238
PROKR2	Prokineticin Receptor 2	2.14096
PROKR1	Prokineticin Receptor 1	2.14096
MEIS3	Meis Homeobox 3	2.14096
MKS1	MKS Transition Zone Complex Subunit 1	2.13957
FARSB	Phenylalanyl-TRNA Synthetase Subunit Beta	2.13957
NEB	Nebulin	2.13957
F2	Coagulation Factor II, Thrombin	2.13771
IGHE	Immunoglobulin Heavy Constant Epsilon	2.13648
CDK2	Cyclin Dependent Kinase 2	2.1355
HLX	H2.0 Like Homeobox	2.12959
HLA-B	Major Histocompatibility Complex, Class I, B	2.12701
TACR1	Tachykinin Receptor 1	2.12635
WEE1	WEE1 G2 Checkpoint Kinase	2.1243
INPP5E	Inositol Polyphosphate-5-Phosphatase E	2.12334
ARL13B	ADP Ribosylation Factor Like GTPase 13B	2.12334
H2AC18	H2A Clustered Histone 18	2.12301
IL17F	Interleukin 17F	2.11154
MEFV	MEFV Innate Immuity Regulator, Pyrin	2.11009
NGF	Nerve Growth Factor	2.10928
CREB1	CAMP Responsive Element Binding Protein 1	2.10684
GRM6	Glutamate Metabotropic Receptor 6	2.09496
WFS1	Wolframin ER Transmembrane Glycoprotein	2.09496
ALMS1	ALMS1 Centrosome And Basal Body Associated Protein	2.09496
KRT3	Keratin 3	2.09496
CNGB3	Cyclic Nucleotide Gated Channel Subunit Beta 3	2.09496
KRT12	Keratin 12	2.09496
UNC93B1	Unc-93 Homolog B1, TLR Signaling Regulator	2.09496
CCT3	Chaperonin Containing TCP1 Subunit 3	2.08945
DHFR	Dihydrofolate Reductase	2.08753
INSR	Insulin Receptor	2.07977
HSPA4	Heat Shock Protein Family A (Hsp70) Member 4	2.07622
NRG1	Neuregulin 1	2.0715
HNF4A	Hepatocyte Nuclear Factor 4 Alpha	2.06882
IL1RAPL2	Interleukin 1 Receptor Accessory Protein Like 2	2.06536
NFKB1	Nuclear Factor Kappa B Subunit 1	2.0632
MBL2	Mannose Binding Lectin 2	2.06258
BGLAP	Bone Gamma-Carboxyglutamate Protein	2.05852
HSPB1	Heat Shock Protein Family B (Small) Member 1	2.05744
TGFBR1	Transforming Growth Factor Beta Receptor 1	2.04589
VWF	Von Willebrand Factor	2.04297
ARL3	ADP Ribosylation Factor Like GTPase 3	2.04289
SETBP1	SET Binding Protein 1	2.04289
CSPP1	Centrosome And Spindle Pole Associated Protein 1	2.04289
RPGRIP1L	RPGRIP1 Like	2.04289
TCTN2	Tectonic Family Member 2	2.04289
TCTN1	Tectonic Family Member 1	2.04289
TMEM138	Transmembrane Protein 138	2.04289
TMEM231	Transmembrane Protein 231	2.04289
TMEM67	Transmembrane Protein 67	2.04289
B9D1	B9 Domain Containing 1	2.04289
CCDC28B	Coiled-Coil Domain Containing 28B	2.04289
TMEM216	Transmembrane Protein 216	2.04289
COL1A1	Collagen Type I Alpha 1 Chain	2.02668
CCND1	Cyclin D1	2.02646
IL12RB2	Interleukin 12 Receptor Subunit Beta 2	2.02447
CTNNB1	Catenin Beta 1	2.02099
TCF7L2	Transcription Factor 7 Like 2	2.0201
GLI1	GLI Family Zinc Finger 1	2.01851
CDK1	Cyclin Dependent Kinase 1	2.01818
JUN	Jun Proto-Oncogene, AP-1 Transcription Factor Subunit	2.01698
GZMB	Granzyme B	2.01071
GCK	Glucokinase	2.0063
APOA1	Apolipoprotein A1	2.00421
CHI3L1	Chitinase 3 Like 1	2.00386
TGFB2	Transforming Growth Factor Beta 2	2.0016
FAS	Fas Cell Surface Death Receptor	1.99378
EPX	Eosinophil Peroxidase	1.98439
SHC1	SHC Adaptor Protein 1	1.98335
APOB	Apolipoprotein B	1.98275
RAD51	RAD51 Recombinase	1.98109
CD14	CD14 Molecule	1.97964
CASP3	Caspase 3	1.97792
HMGA1	High Mobility Group AT-Hook 1	1.97581
HNF1A	HNF1 Homeobox A	1.97581
ESR1	Estrogen Receptor 1	1.96662
PRKG1	Protein Kinase CGMP-Dependent 1	1.96491
TCF4	Transcription Factor 4	1.96271
CHGA	Chromogranin A	1.96213
CTDP1	CTD Phosphatase Subunit 1	1.95864
GRB2	Growth Factor Receptor Bound Protein 2	1.94528
ITGA4	Integrin Subunit Alpha 4	1.94304
RPE65	Retinoid Isomerohydrolase RPE65	1.93965
GDAP1	Ganglioside Induced Differentiation Associated Protein 1	1.93965
DCTN2	Dynactin Subunit 2	1.93965
MPEG1	Macrophage Expressed 1	1.93706
TGIF1	TGFB Induced Factor Homeobox 1	1.93575
SLC8A1	Solute Carrier Family 8 Member A1	1.93332
HCRT	Hypocretin Neuropeptide Precursor	1.92936
HIRA	Histone Cell Cycle Regulator	1.92374
VEGFA	Vascular Endothelial Growth Factor A	1.92368
FUT2	Fucosyltransferase 2	1.92311
CCT5	Chaperonin Containing TCP1 Subunit 5	1.92092
S100A12	S100 Calcium Binding Protein A12	1.91825
ABCA4	ATP Binding Cassette Subfamily A Member 4	1.91809
LIPC	Lipase C, Hepatic Type	1.91809
B2M	Beta-2-Microglobulin	1.91584
BAX	BCL2 Associated X, Apoptosis Regulator	1.91157
RB1	RB Transcriptional Corepressor 1	1.91144
NTF3	Neurotrophin 3	1.91115
APP	Amyloid Beta Precursor Protein	1.90674
CCR9	C-C Motif Chemokine Receptor 9	1.9057
GCN1	GCN1 Activator Of EIF2AK4	1.90032
RASGEF1A	RasGEF Domain Family Member 1A	1.89843
PSMC4	Proteasome 26S Subunit, ATPase 4	1.89842
CCL4	C-C Motif Chemokine Ligand 4	1.8951
FGFR3	Fibroblast Growth Factor Receptor 3	1.89252
GPHN	Gephyrin	1.89252
MFN2	Mitofusin 2	1.89252
PDX1	Pancreatic And Duodenal Homeobox 1	1.89252
IRS2	Insulin Receptor Substrate 2	1.89252
MTNR1B	Melatonin Receptor 1B	1.89252
HNF1B	HNF1 Homeobox B	1.89252
RIF1	Replication Timing Regulatory Factor 1	1.89252
GARS1	Glycyl-TRNA Synthetase 1	1.89252
MT-ND5	Mitochondrially Encoded NADH:Ubiquinone Oxidoreductase Core Subunit 5	1.89252
MYO5B	Myosin VB	1.89147
GLUL	Glutamate-Ammonia Ligase	1.89018
FN1	Fibronectin 1	1.88853
TCOF1	Treacle Ribosome Biogenesis Factor 1	1.8854
BMP2	Bone Morphogenetic Protein 2	1.88461
SLC5A1	Solute Carrier Family 5 Member 1	1.88254
TNFSF15	TNF Superfamily Member 15	1.8777
S100A8	S100 Calcium Binding Protein A8	1.8777
HMOX1	Heme Oxygenase 1	1.87764
CD8A	CD8a Molecule	1.87733
LPAR1	Lysophosphatidic Acid Receptor 1	1.87135
FPR1	Formyl Peptide Receptor 1	1.86679
RAD51C	RAD51 Paralog C	1.86602
SEC24C	SEC24 Homolog C, COPII Coat Complex Component	1.86602
XRCC2	X-Ray Repair Cross Complementing 2	1.86602
FTL	Ferritin Light Chain	1.86137
ABCC8	ATP Binding Cassette Subfamily C Member 8	1.8592
OTX2	Orthodenticle Homeobox 2	1.8592
NEFL	Neurofilament Light Chain	1.8592
NR2E3	Nuclear Receptor Subfamily 2 Group E Member 3	1.8592
MORC2	MORC Family CW-Type Zinc Finger 2	1.8592
AARS1	Alanyl-TRNA Synthetase 1	1.8592
OTC	Ornithine Transcarbamylase	1.85572
LTA	Lymphotoxin Alpha	1.85394
HIF1A	Hypoxia Inducible Factor 1 Subunit Alpha	1.85299
MMP2	Matrix Metallopeptidase 2	1.85285
RIPK2	Receptor Interacting Serine/Threonine Kinase 2	1.85213
NCAM1	Neural Cell Adhesion Molecule 1	1.84851
S100A9	S100 Calcium Binding Protein A9	1.84424
NOS2	Nitric Oxide Synthase 2	1.84286
SPINK1	Serine Peptidase Inhibitor Kazal Type 1	1.84285
IGES	Immunoglobulin E Concentration, Serum	1.84143
PTGS1	Prostaglandin-Endoperoxide Synthase 1	1.84125
SF3B4	Splicing Factor 3b Subunit 4	1.84045
PIBF1	Progesterone Immunomodulatory Binding Factor 1	1.84045
CBY1	Chibby Family Member 1, Beta Catenin Antagonist	1.84045
CD40LG	CD40 Ligand	1.8382
PTPN22	Protein Tyrosine Phosphatase Non-Receptor Type 22	1.82525
MTOR	Mechanistic Target Of Rapamycin Kinase	1.82097
TECR	Trans-2,3-Enoyl-CoA Reductase	1.81987
CPSF3	Cleavage And Polyadenylation Specific Factor 3	1.81987
CTSW	Cathepsin W	1.81987
FOXK2	Forkhead Box K2	1.81987
CSF1	Colony Stimulating Factor 1	1.81985
SIRT2	Sirtuin 2	1.81941
NRG2	Neuregulin 2	1.81904
ZYX	Zyxin	1.81798
TONSL	Tonsoku Like, DNA Repair Protein	1.81671
ATG16L1	Autophagy Related 16 Like 1	1.80934
IRGM	Immunity Related GTPase M	1.80934
GLP2R	Glucagon Like Peptide 2 Receptor	1.80792
FANCC	FA Complementation Group C	1.80713
ATRX	ATRX Chromatin Remodeler	1.80713
FANCL	FA Complementation Group L	1.80713
MAD2L2	Mitotic Arrest Deficient 2 Like 2	1.80713
BCOR	BCL6 Corepressor	1.80713
FANCM	FA Complementation Group M	1.80713
FANCF	FA Complementation Group F	1.80713
JMJD1C	Jumonji Domain Containing 1C	1.80713
CPLANE1	Ciliogenesis And Planar Polarity Effector Complex Subunit 1	1.80713
IRF5	Interferon Regulatory Factor 5	1.79281
LCT	Lactase	1.78468
GRIN2B	Glutamate Ionotropic Receptor NMDA Type Subunit 2B	1.77875
IMPDH1	Inosine Monophosphate Dehydrogenase 1	1.77875
SCN10A	Sodium Voltage-Gated Channel Alpha Subunit 10	1.77875
DGKE	Diacylglycerol Kinase Epsilon	1.77875
KCNJ11	Potassium Inwardly Rectifying Channel Subfamily J Member 11	1.77875
NMNAT1	Nicotinamide Nucleotide Adenylyltransferase 1	1.77875
PCYT1A	Phosphate Cytidylyltransferase 1A, Choline	1.77875
PDE6A	Phosphodiesterase 6A	1.77875
GPD2	Glycerol-3-Phosphate Dehydrogenase 2	1.77875
PITX2	Paired Like Homeodomain 2	1.77875
SGPL1	Sphingosine-1-Phosphate Lyase 1	1.77875
SPTLC1	Serine Palmitoyltransferase Long Chain Base Subunit 1	1.77875
LRAT	Lecithin Retinol Acyltransferase	1.77875
SMARCAD1	SWI/SNF-Related, Matrix-Associated Actin-Dependent Regulator Of Chromatin, Subfamily A, Containing DEAD/H Box 1	1.77875
COL4A5	Collagen Type IV Alpha 5 Chain	1.77875
CRB1	Crumbs Cell Polarity Complex Component 1	1.77875
FIG4	FIG4 Phosphoinositide 5-Phosphatase	1.77875
IGF2BP2	Insulin Like Growth Factor 2 MRNA Binding Protein 2	1.77875
NDRG1	N-Myc Downstream Regulated 1	1.77875
RGS9	Regulator Of G Protein Signaling 9	1.77875
BAAT	Bile Acid-CoA:Amino Acid N-Acyltransferase	1.77875
CFHR1	Complement Factor H Related 1	1.77875
CNTNAP1	Contactin Associated Protein 1	1.77875
GDF6	Growth Differentiation Factor 6	1.77875
KCNJ13	Potassium Inwardly Rectifying Channel Subfamily J Member 13	1.77875
LITAF	Lipopolysaccharide Induced TNF Factor	1.77875
MID1	Midline 1	1.77875
PAX4	Paired Box 4	1.77875
RDH12	Retinol Dehydrogenase 12	1.77875
SCN11A	Sodium Voltage-Gated Channel Alpha Subunit 11	1.77875
TBC1D4	TBC1 Domain Family Member 4	1.77875
AIPL1	Aryl Hydrocarbon Receptor Interacting Protein Like 1	1.77875
CRX	Cone-Rod Homeobox	1.77875
FOXC1	Forkhead Box C1	1.77875
IQCB1	IQ Motif Containing B1	1.77875
PPP1R3A	Protein Phosphatase 1 Regulatory Subunit 3A	1.77875
SLC30A8	Solute Carrier Family 30 Member 8	1.77875
TULP1	TUB Like Protein 1	1.77875
CFHR3	Complement Factor H Related 3	1.77875
CFHR5	Complement Factor H Related 5	1.77875
IFT140	Intraflagellar Transport 140	1.77875
PRX	Periaxin	1.77875
RP2	RP2 Activator Of ARL3 GTPase	1.77875
CDHR1	Cadherin Related Family Member 1	1.77875
KLHL7	Kelch Like Family Member 7	1.77875
USP45	Ubiquitin Specific Peptidase 45	1.77875
GIGYF2	GRB10 Interacting GYF Protein 2	1.77875
LCA5	Lebercilin LCA5	1.77875
LRSAM1	Leucine Rich Repeat And Sterile Alpha Motif Containing 1	1.77875
RPGRIP1	RPGR Interacting Protein 1	1.77875
SPECC1L	Sperm Antigen With Calponin Homology And Coiled-Coil Domains 1 Like	1.77875
ZFYVE26	Zinc Finger FYVE-Type Containing 26	1.77875
RD3	RD3 Regulator Of GUCY2D	1.77875
SH3TC2	SH3 Domain And Tetratricopeptide Repeats 2	1.77875
SLC26A1	Solute Carrier Family 26 Member 1	1.77875
CFHR4	Complement Factor H Related 4	1.77875
SPATA7	Spermatogenesis Associated 7	1.77875
WARS1	Tryptophanyl-TRNA Synthetase 1	1.77875
CLUAP1	Clusterin Associated Protein 1	1.77875
DRP2	Dystrophin Related Protein 2	1.77875
MT-ND2	Mitochondrially Encoded NADH:Ubiquinone Oxidoreductase Core Subunit 2	1.77875
C12orf29	Chromosome 12 Open Reading Frame 29	1.77875
MT-ND3	Mitochondrially Encoded NADH:Ubiquinone Oxidoreductase Core Subunit 3	1.77875
MT-ND4	Mitochondrially Encoded NADH:Ubiquinone Oxidoreductase Core Subunit 4	1.77875
MT-ND6	Mitochondrially Encoded NADH:Ubiquinone Oxidoreductase Core Subunit 6	1.77875
ZDHHC24	Zinc Finger DHHC-Type Containing 24	1.77875
MT-CO3	Mitochondrially Encoded Cytochrome C Oxidase III	1.77875
ZNF454	Zinc Finger Protein 454	1.77875
CFAP410	Cilia And Flagella Associated Protein 410	1.77875
MT-ND4L	Mitochondrially Encoded NADH:Ubiquinone Oxidoreductase Core Subunit 4L	1.77875
MT-RNR1	Mitochondrially Encoded 12S RRNA	1.77875
MIR657	MicroRNA 657	1.77875
SPECC1L-ADORA2A	SPECC1L-ADORA2A Readthrough (NMD Candidate)	1.77875
MT-TS1	Mitochondrially Encoded TRNA-Ser (UCN) 1	1.77875
SCN1A-AS1	SCN1A And SCN9A Antisense RNA 1	1.77875
PDE6B-AS1	PDE6B Antisense RNA 1	1.77875
MYP10	Myopia 10	1.77875
MYP14	Myopia 14	1.77875
MYP7	Myopia 7	1.77875
MYP8	Myopia 8	1.77875
MYP9	Myopia 9	1.77875
RIEG2	Rieger Syndrome 2	1.77875
TAPVR1	Total Anomalous Pulmonary Venous Return 1	1.77875
NIDDM4	Diabetes Mellitus, Noninsulin-Dependent	1.77875
INPP5D	Inositol Polyphosphate-5-Phosphatase D	1.77812
CEP43	Centrosomal Protein 43	1.77812
DIABLO	Diablo IAP-Binding Mitochondrial Protein	1.77148
TTC8	Tetratricopeptide Repeat Domain 8	1.7681
SEMA3A	Semaphorin 3A	1.75939
CDKN3	Cyclin Dependent Kinase Inhibitor 3	1.757
BBS4	Bardet-Biedl Syndrome 4	1.74654
TAF15	TATA-Box Binding Protein Associated Factor 15	1.74654
BBS5	Bardet-Biedl Syndrome 5	1.74654
BBS9	Bardet-Biedl Syndrome 9	1.74654
BBS7	Bardet-Biedl Syndrome 7	1.74654
TRIM21	Tripartite Motif Containing 21	1.74574
IL26	Interleukin 26	1.7448
SCT	Secretin	1.74368
MLNR	Motilin Receptor	1.74122
CETP	Cholesteryl Ester Transfer Protein	1.741
DLG5	Discs Large MAGUK Scaffold Protein 5	1.73836
NKX2-3	NK2 Homeobox 3	1.73836
LACC1	Laccase Domain Containing 1	1.73836
MUC2	Mucin 2, Oligomeric Mucus/Gel-Forming	1.73065
TSLP	Thymic Stromal Lymphopoietin	1.7305
NMU	Neuromedin U	1.72929
FOXC2	Forkhead Box C2	1.72744
SLC6A8	Solute Carrier Family 6 Member 8	1.72668
GP1BB	Glycoprotein Ib Platelet Subunit Beta	1.72668
PALB2	Partner And Localizer Of BRCA2	1.72668
RREB1	Ras Responsive Element Binding Protein 1	1.72668
SALL4	Spalt Like Transcription Factor 4	1.72668
SH2B1	SH2B Adaptor Protein 1	1.72668
ARL6	ADP Ribosylation Factor Like GTPase 6	1.72668
FANCG	FA Complementation Group G	1.72668
NAA10	N-Alpha-Acetyltransferase 10, NatA Catalytic Subunit	1.72668
TBX1	T-Box Transcription Factor 1	1.72668
UBE2T	Ubiquitin Conjugating Enzyme E2 T	1.72668
FANCE	FA Complementation Group E	1.72668
PIGN	Phosphatidylinositol Glycan Anchor Biosynthesis Class N	1.72668
ZNF423	Zinc Finger Protein 423	1.72668
CEP120	Centrosomal Protein 120	1.72668
CEP41	Centrosomal Protein 41	1.72668
DDX59	DEAD-Box Helicase 59	1.72668
HYLS1	HYLS1 Centriolar And Ciliogenesis Associated	1.72668
PIGL	Phosphatidylinositol Glycan Anchor Biosynthesis Class L	1.72668
RFWD3	Ring Finger And WD Repeat Domain 3	1.72668
ARMC9	Armadillo Repeat Containing 9	1.72668
PGAP3	Post-GPI Attachment To Proteins Phospholipase 3	1.72668
PIGW	Phosphatidylinositol Glycan Anchor Biosynthesis Class W	1.72668
SLX4	SLX4 Structure-Specific Endonuclease Subunit	1.72668
KIAA0586	KIAA0586	1.72668
CEP104	Centrosomal Protein 104	1.72668
PGAP2	Post-GPI Attachment To Proteins 2	1.72668
PIGY	Phosphatidylinositol Glycan Anchor Biosynthesis Class Y	1.72668
KATNIP	Katanin Interacting Protein	1.72668
RUNX1	RUNX Family Transcription Factor 1	1.71984
CDH17	Cadherin 17	1.71853
AEBP2	AE Binding Protein 2	1.71853
CDH1	Cadherin 1	1.71793
SELL	Selectin L	1.71713
KPNB1	Karyopherin Subunit Beta 1	1.71708
NFE2L2	NFE2 Like BZIP Transcription Factor 2	1.71668
CDX2	Caudal Type Homeobox 2	1.71161
NES	Nestin	1.71067
ADCY10	Adenylate Cyclase 10	1.70845
GH1	Growth Hormone 1	1.70647
SNAP25	Synaptosome Associated Protein 25	1.70306
FOS	Fos Proto-Oncogene, AP-1 Transcription Factor Subunit	1.70033
PIK3CA	Phosphatidylinositol-4,5-Bisphosphate 3-Kinase Catalytic Subunit Alpha	1.69934
TAT	Tyrosine Aminotransferase	1.69771
MAPK1	Mitogen-Activated Protein Kinase 1	1.69705
IRF9	Interferon Regulatory Factor 9	1.68765
KANK2	KN Motif And Ankyrin Repeat Domains 2	1.68576
DXO	Decapping Exoribonuclease	1.68576
DDX58	DExD/H-Box Helicase 58	1.68564
MALAT1	Metastasis Associated Lung Adenocarcinoma Transcript 1	1.68485
CASP8	Caspase 8	1.68147
SI	Sucrase-Isomaltase	1.67727
CAT	Catalase	1.67719
NPPB	Natriuretic Peptide B	1.67467
CCT2	Chaperonin Containing TCP1 Subunit 2	1.66829
CYP2C19	Cytochrome P450 Family 2 Subfamily C Member 19	1.66507
STAT4	Signal Transducer And Activator Of Transcription 4	1.66435
HSPA2	Heat Shock Protein Family A (Hsp70) Member 2	1.66435
IL18BP	Interleukin 18 Binding Protein	1.66435
UBE4A	Ubiquitination Factor E4A	1.66435
FMNL2	Formin Like 2	1.66435
IL18RAP	Interleukin 18 Receptor Accessory Protein	1.66435
SP140	SP140 Nuclear Body Protein	1.66435
SERPINA3	Serpin Family A Member 3	1.66226
CCL3	C-C Motif Chemokine Ligand 3	1.65758
GFRA4	GDNF Family Receptor Alpha 4	1.63022
ADIPOQ	Adiponectin, C1Q And Collagen Domain Containing	1.62783
MMP3	Matrix Metallopeptidase 3	1.62248
CD44	CD44 Molecule (Indian Blood Group)	1.62137
MBP	Myelin Basic Protein	1.61976
SIRT1	Sirtuin 1	1.61875
PDP1	Pyruvate Dehydrogenase Phosphatase Catalytic Subunit 1	1.61724
HTRA1	HtrA Serine Peptidase 1	1.61724
MGAM	Maltase-Glucoamylase	1.61549
VCAM1	Vascular Cell Adhesion Molecule 1	1.61117
GAD1	Glutamate Decarboxylase 1	1.60999
CRAT	Carnitine O-Acetyltransferase	1.60925
HTR4	5-Hydroxytryptamine Receptor 4	1.60755
STAT2	Signal Transducer And Activator Of Transcription 2	1.6072
METRNL	Meteorin Like, Glial Cell Differentiation Regulator	1.6072
MECP2	Methyl-CpG Binding Protein 2	1.60379
EDN1	Endothelin 1	1.60243
NOTCH1	Notch Receptor 1	1.60239
IL9	Interleukin 9	1.60234
CD83	CD83 Molecule	1.59821
GGT1	Gamma-Glutamyltransferase 1	1.59651
TLR6	Toll Like Receptor 6	1.59167
SHPK	Sedoheptulokinase	1.58854
MIF	Macrophage Migration Inhibitory Factor	1.58444
ESCO2	Establishment Of Sister Chromatid Cohesion N-Acetyltransferase 2	1.57994
FASLG	Fas Ligand	1.57825
IL2RB	Interleukin 2 Receptor Subunit Beta	1.57345
GSR	Glutathione-Disulfide Reductase	1.57252
SMAD4	SMAD Family Member 4	1.56967
ODC1	Ornithine Decarboxylase 1	1.5689
BCHE	Butyrylcholinesterase	1.56884
CDKN1A	Cyclin Dependent Kinase Inhibitor 1A	1.56357
GLI2	GLI Family Zinc Finger 2	1.55371
PCDHA9	Protocadherin Alpha 9	1.54977
HSP90AA1	Heat Shock Protein 90 Alpha Family Class A Member 1	1.5491
NINJ2	Ninjurin 2	1.54572
DHX15	DEAH-Box Helicase 15	1.54539
NR1H2	Nuclear Receptor Subfamily 1 Group H Member 2	1.54504
PDZD3	PDZ Domain Containing 3	1.54393
CCL5	C-C Motif Chemokine Ligand 5	1.53865
HOXA13	Homeobox A13	1.53792
POLG	DNA Polymerase Gamma, Catalytic Subunit	1.5341
ACTB	Actin Beta	1.53328
BIRC5	Baculoviral IAP Repeat Containing 5	1.53328
NEK2	NIMA Related Kinase 2	1.53234
CD55	CD55 Molecule (Cromer Blood Group)	1.53168
MSH6	MutS Homolog 6	1.53165
ARL2	ADP Ribosylation Factor Like GTPase 2	1.52742
IFNA2	Interferon Alpha 2	1.52662
TJP1	Tight Junction Protein 1	1.52565
PF4	Platelet Factor 4	1.52057
LRBA	LPS Responsive Beige-Like Anchor Protein	1.5177
PRPF8	Pre-MRNA Processing Factor 8	1.51674
SOX2	SRY-Box Transcription Factor 2	1.51423
ARTN	Artemin	1.51145
DMD	Dystrophin	1.51119
ACTA1	Actin Alpha 1, Skeletal Muscle	1.51056
VDAC1	Voltage Dependent Anion Channel 1	1.5088
HRH2	Histamine Receptor H2	1.5088
FEN1	Flap Structure-Specific Endonuclease 1	1.50384
FABP2	Fatty Acid Binding Protein 2	1.50051
PIK3C2A	Phosphatidylinositol-4-Phosphate 3-Kinase Catalytic Subunit Type 2 Alpha	1.4993
MIR223	MicroRNA 223	1.49901
VIM	Vimentin	1.49898
CACNA1B	Calcium Voltage-Gated Channel Subunit Alpha1 B	1.49843
OXT	Oxytocin/Neurophysin I Prepropeptide	1.49685
PSPN	Persephin	1.49067
SERPINE1	Serpin Family E Member 1	1.48225
CD36	CD36 Molecule	1.47886
SLC18A3	Solute Carrier Family 18 Member A3	1.47854
LCN1	Lipocalin 1	1.47854
SLC2A1	Solute Carrier Family 2 Member 1	1.47125
GFRA2	GDNF Family Receptor Alpha 2	1.46834
IL6R	Interleukin 6 Receptor	1.46723
CXCR4	C-X-C Motif Chemokine Receptor 4	1.4633
REN	Renin	1.45789
CASP4	Caspase 4	1.45605
NEAT1	Nuclear Paraspeckle Assembly Transcript 1	1.45443
SUV39H1	SUV39H1 Histone Lysine Methyltransferase	1.45189
MFSD2A	Major Facilitator Superfamily Domain Containing 2A	1.45189
WASHC2C	WASH Complex Subunit 2C	1.45189
GLUD1	Glutamate Dehydrogenase 1	1.44932
CDKN2A	Cyclin Dependent Kinase Inhibitor 2A	1.44859
KRT20	Keratin 20	1.44194
SOAT1	Sterol O-Acyltransferase 1	1.4342
BUB1	BUB1 Mitotic Checkpoint Serine/Threonine Kinase	1.43033
NUP98	Nucleoporin 98 And 96 Precursor	1.4295
RPS27A	Ribosomal Protein S27a	1.4292
GABBR1	Gamma-Aminobutyric Acid Type B Receptor Subunit 1	1.42752
TOR1A	Torsin Family 1 Member A	1.42737
KPNA6	Karyopherin Subunit Alpha 6	1.42478
CTSL	Cathepsin L	1.42431
CCNB1	Cyclin B1	1.42304
CSF3R	Colony Stimulating Factor 3 Receptor	1.42006
SOD2	Superoxide Dismutase 2	1.41825
GHR	Growth Hormone Receptor	1.41825
IRF8	Interferon Regulatory Factor 8	1.41787
FGF2	Fibroblast Growth Factor 2	1.41623
ZEB1	Zinc Finger E-Box Binding Homeobox 1	1.4123
TGFB3	Transforming Growth Factor Beta 3	1.41158
SMARCE1	SWI/SNF Related, Matrix Associated, Actin Dependent Regulator Of Chromatin, Subfamily E, Member 1	1.40761
IPO5	Importin 5	1.40761
PARP1	Poly(ADP-Ribose) Polymerase 1	1.40519
GIP	Gastric Inhibitory Polypeptide	1.40493
ITGB7	Integrin Subunit Beta 7	1.40476
USP16	Ubiquitin Specific Peptidase 16	1.40476
MIR31HG	MIR31 Host Gene	1.40393
CCN2	Cellular Communication Network Factor 2	1.3985
CHRM1	Cholinergic Receptor Muscarinic 1	1.39809
SPINT2	Serine Peptidase Inhibitor, Kunitz Type 2	1.39672
NOS3	Nitric Oxide Synthase 3	1.39501
SLC1A6	Solute Carrier Family 1 Member 6	1.39251
CDK6	Cyclin Dependent Kinase 6	1.39243
CLEC7A	C-Type Lectin Domain Containing 7A	1.39015
CDC25C	Cell Division Cycle 25C	1.38971
PRC1	Protein Regulator Of Cytokinesis 1	1.38862
SLIT2	Slit Guidance Ligand 2	1.38671
CXCL1	C-X-C Motif Chemokine Ligand 1	1.37969
RELA	RELA Proto-Oncogene, NF-KB Subunit	1.37957
MEG3	Maternally Expressed 3	1.37488
HLA-A	Major Histocompatibility Complex, Class I, A	1.37416
SYVN1	Synoviolin 1	1.37398
POMC	Proopiomelanocortin	1.37181
STK4	Serine/Threonine Kinase 4	1.37144
GRIK2	Glutamate Ionotropic Receptor Kainate Type Subunit 2	1.37144
POLR2D	RNA Polymerase II Subunit D	1.37144
GTSE1	G2 And S-Phase Expressed 1	1.37144
POLR2G	RNA Polymerase II Subunit G	1.37144
NANOG	Nanog Homeobox	1.37144
ATAT1	Alpha Tubulin Acetyltransferase 1	1.37144
EGR2	Early Growth Response 2	1.3706
ALOX5	Arachidonate 5-Lipoxygenase	1.37055
ADRB2	Adrenoceptor Beta 2	1.36953
PNLIP	Pancreatic Lipase	1.36953
TACR2	Tachykinin Receptor 2	1.36738
KLK3	Kallikrein Related Peptidase 3	1.36365
ALPI	Alkaline Phosphatase, Intestinal	1.36115
CASP6	Caspase 6	1.3607
MME	Membrane Metalloendopeptidase	1.35906
ACP1	Acid Phosphatase 1	1.35868
ADRA2A	Adrenoceptor Alpha 2A	1.3578
CYP51A1	Cytochrome P450 Family 51 Subfamily A Member 1	1.35683
GTDC1	Glycosyltransferase Like Domain Containing 1	1.35651
CDB2	Corneal Dystrophy Of Bowman Layer Type II (Thiel-Behnke)	1.35575
ORC6	Origin Recognition Complex Subunit 6	1.35529
ESR2	Estrogen Receptor 2	1.35426
WNT1	Wnt Family Member 1	1.35055
KCNN3	Potassium Calcium-Activated Channel Subfamily N Member 3	1.35055
CELSR3	Cadherin EGF LAG Seven-Pass G-Type Receptor 3	1.35055
MYD88	MYD88 Innate Immune Signal Transduction Adaptor	1.3471
AMN1	Antagonist Of Mitotic Exit Network 1 Homolog	1.34692
HEPH	Hephaestin	1.34536
NDRG4	NDRG Family Member 4	1.34536
CCT6A	Chaperonin Containing TCP1 Subunit 6A	1.3415
MORF4	Mortality Factor 4 (Pseudogene)	1.3415
SNIP1	Smad Nuclear Interacting Protein 1	1.34085
CLEC4M	C-Type Lectin Domain Family 4 Member M	1.33932
PDGFRB	Platelet Derived Growth Factor Receptor Beta	1.33762
IL1RL1	Interleukin 1 Receptor Like 1	1.33505
DUOX2	Dual Oxidase 2	1.33387
SIGLEC8	Sialic Acid Binding Ig Like Lectin 8	1.33023
IHH	Indian Hedgehog Signaling Molecule	1.32899
MSX1	Msh Homeobox 1	1.32899
NRG3	Neuregulin 3	1.32899
MCS+9.7	RET Intron 1 Enhancer	1.32899
DNMT3B	DNA Methyltransferase 3 Beta	1.32819
GYPC	Glycophorin C (Gerbich Blood Group)	1.32524
TPI1	Triosephosphate Isomerase 1	1.32221
SLC11A1	Solute Carrier Family 11 Member 1	1.31985
CRYAA	Crystallin Alpha A	1.3164
TTF2	Transcription Termination Factor 2	1.31257
NT5E	5'-Nucleotidase Ecto	1.31119
CYP3A5	Cytochrome P450 Family 3 Subfamily A Member 5	1.30985
PDGFRA	Platelet Derived Growth Factor Receptor Alpha	1.30892
NUP107	Nucleoporin 107	1.30817
CCT7	Chaperonin Containing TCP1 Subunit 7	1.30817
SKIL	SKI Like Proto-Oncogene	1.30817
NUP35	Nucleoporin 35	1.30817
NUP58	Nucleoporin 58	1.30817
FOXO1	Forkhead Box O1	1.30807
TNFSF11	TNF Superfamily Member 11	1.30807
HOXA9	Homeobox A9	1.30807
CXCR3	C-X-C Motif Chemokine Receptor 3	1.30466
RGS6	Regulator Of G Protein Signaling 6	1.30342
EDN2	Endothelin 2	1.30342
RHOA	Ras Homolog Family Member A	1.30129
PRG2	Proteoglycan 2, Pro Eosinophil Major Basic Protein	1.29916
UBE2D1	Ubiquitin Conjugating Enzyme E2 D1	1.29654
AQP4	Aquaporin 4	1.29284
GRIA2	Glutamate Ionotropic Receptor AMPA Type Subunit 2	1.29099
GRIA4	Glutamate Ionotropic Receptor AMPA Type Subunit 4	1.29099
PPP1CA	Protein Phosphatase 1 Catalytic Subunit Alpha	1.29099
OXCT1	3-Oxoacid CoA-Transferase 1	1.29099
STK3	Serine/Threonine Kinase 3	1.29099
NBL1	NBL1, DAN Family BMP Antagonist	1.29099
MYO18B	Myosin XVIIIB	1.29099
XPO4	Exportin 4	1.29099
FOXK1	Forkhead Box K1	1.29099
RNF186	Ring Finger Protein 186	1.29099
SF3B6	Splicing Factor 3b Subunit 6	1.29099
BBIP1	BBSome Interacting Protein 1	1.29099
ACOT6	Acyl-CoA Thioesterase 6	1.29099
MBLAC1	Metallo-Beta-Lactamase Domain Containing 1	1.29099
PTCH1	Patched 1	1.29015
MIR483	MicroRNA 483	1.29015
BACE1	Beta-Secretase 1	1.28971
CARTPT	CART Prepropeptide	1.28908
MIR195	MicroRNA 195	1.28908
CRH	Corticotropin Releasing Hormone	1.2876
FAAH	Fatty Acid Amide Hydrolase	1.28686
PRL	Prolactin	1.28574
SELE	Selectin E	1.28489
SYK	Spleen Associated Tyrosine Kinase	1.28368
MAP3K20	Mitogen-Activated Protein Kinase Kinase Kinase 20	1.28167
TTC3	Tetratricopeptide Repeat Domain 3	1.28048
LRWD1	Leucine Rich Repeats And WD Repeat Domain Containing 1	1.28048
DIAPH3	Diaphanous Related Formin 3	1.27825
HSPD1	Heat Shock Protein Family D (Hsp60) Member 1	1.27706
FBXO11	F-Box Protein 11	1.27484
DBF4B	DBF4 Zinc Finger B	1.27484
CAPN2	Calpain 2	1.27381
KHSRP	KH-Type Splicing Regulatory Protein	1.27381
ACE	Angiotensin I Converting Enzyme	1.27377
ISG20L2	Interferon Stimulated Exonuclease Gene 20 Like 2	1.27295
POLA1	DNA Polymerase Alpha 1, Catalytic Subunit	1.27065
ADAR	Adenosine Deaminase RNA Specific	1.27065
DEFB126	Defensin Beta 126	1.27065
CHL1	Cell Adhesion Molecule L1 Like	1.2701
DSCAM	DS Cell Adhesion Molecule	1.2701
ARHGEF3	Rho Guanine Nucleotide Exchange Factor 3	1.2701
SEMA6A	Semaphorin 6A	1.2701
CTNNAL1	Catenin Alpha Like 1	1.2701
DOK6	Docking Protein 6	1.2701
DPF3	Double PHD Fingers 3	1.2701
DES	Desmin	1.26914
NEFH	Neurofilament Heavy Chain	1.26753
SMN2	Survival Of Motor Neuron 2, Centromeric	1.26753
ADRB3	Adrenoceptor Beta 3	1.26606
COPA	COPI Coat Complex Subunit Alpha	1.26411
UBE2V2	Ubiquitin Conjugating Enzyme E2 V2	1.26307
MTHFR	Methylenetetrahydrofolate Reductase	1.26169
E2F1	E2F Transcription Factor 1	1.2616
AR	Androgen Receptor	1.26115
GAP43	Growth Associated Protein 43	1.25824
KRT71	Keratin 71	1.25738
GSN	Gelsolin	1.25094
DDX11	DEAD/H-Box Helicase 11	1.25094
ORC1	Origin Recognition Complex Subunit 1	1.24612
CXCL2	C-X-C Motif Chemokine Ligand 2	1.24531
PRKCB	Protein Kinase C Beta	1.24196
NEFM	Neurofilament Medium Chain	1.24196
TUBA1B	Tubulin Alpha 1b	1.24107
HTT	Huntingtin	1.23901
EXOSC3	Exosome Component 3	1.23732
CCR3	C-C Motif Chemokine Receptor 3	1.23607
LTBP3	Latent Transforming Growth Factor Beta Binding Protein 3	1.23226
STMN1	Stathmin 1	1.23092
LOC106736614	RET 5' Regulatory Region	1.22956
CCT6B	Chaperonin Containing TCP1 Subunit 6B	1.22772
CXCR6	C-X-C Motif Chemokine Receptor 6	1.22772
MAPK10	Mitogen-Activated Protein Kinase 10	1.22586
MAPT	Microtubule Associated Protein Tau	1.22471
DYRK1A	Dual Specificity Tyrosine Phosphorylation Regulated Kinase 1A	1.22208
EPS8	Epidermal Growth Factor Receptor Pathway Substrate 8	1.22208
P2RY4	Pyrimidinergic Receptor P2Y4	1.22208
SOAT2	Sterol O-Acyltransferase 2	1.22135
SCARB1	Scavenger Receptor Class B Member 1	1.22084
SMAD2	SMAD Family Member 2	1.21906
SF3B2	Splicing Factor 3b Subunit 2	1.21867
SCG2	Secretogranin II	1.21377
ITGB2	Integrin Subunit Beta 2	1.20874
NRXN1	Neurexin 1	1.20863
CCL17	C-C Motif Chemokine Ligand 17	1.20863
SLC25A4	Solute Carrier Family 25 Member 4	1.20834
TLR3	Toll Like Receptor 3	1.20704
SLC9A8	Solute Carrier Family 9 Member A8	1.20351
PECAM1	Platelet And Endothelial Cell Adhesion Molecule 1	1.20216
ESRRB	Estrogen Related Receptor Beta	1.20053
BCL3	BCL3 Transcription Coactivator	1.20053
COL3A1	Collagen Type III Alpha 1 Chain	1.20007
TERT	Telomerase Reverse Transcriptase	1.19919
MIR125A	MicroRNA 125a	1.19514
AKT3	AKT Serine/Threonine Kinase 3	1.18965
AXIN2	Axin 2	1.18965
ZIC1	Zic Family Member 1	1.18965
FABP7	Fatty Acid Binding Protein 7	1.18965
BACE2	Beta-Secretase 2	1.18965
PECR	Peroxisomal Trans-2-Enoyl-CoA Reductase	1.18965
ELAVL4	ELAV Like RNA Binding Protein 4	1.18965
FOXD3	Forkhead Box D3	1.18965
HOXB3	Homeobox B3	1.18965
MYO18A	Myosin XVIIIA	1.18965
SEMA3B	Semaphorin 3B	1.18965
DENND3	DENN Domain Containing 3	1.18965
ELAVL3	ELAV Like RNA Binding Protein 3	1.18965
NCLN	Nicalin	1.18965
NRSN1	Neurensin 1	1.18965
TBATA	Thymus, Brain And Testes Associated	1.18965
ZNF609	Zinc Finger Protein 609	1.18965
FAM162B	Family With Sequence Similarity 162 Member B	1.18965
C17orf107	Chromosome 17 Open Reading Frame 107	1.18965
HOTTIP	HOXA Distal Transcript Antisense RNA	1.18965
LINC00619	Long Intergenic Non-Protein Coding RNA 619	1.18965
LINC00924	Long Intergenic Non-Protein Coding RNA 924	1.18965
LINC01518	Long Intergenic Non-Protein Coding RNA 1518	1.18965
LINC01844	Long Intergenic Non-Protein Coding RNA 1844	1.18965
MTRNR2L12	MT-RNR2 Like 12 (Pseudogene)	1.18965
MIR4318	MicroRNA 4318	1.18965
LOC110121502	VISTA Enhancer Hs2326	1.18965
ARG1	Arginase 1	1.18679
GUSB	Glucuronidase Beta	1.18642
IFNGR1	Interferon Gamma Receptor 1	1.18539
MB	Myoglobin	1.18439
COL6A3	Collagen Type VI Alpha 3 Chain	1.18262
MCFD2	Multiple Coagulation Factor Deficiency 2, ER Cargo Receptor Complex Subunit	1.18262
SGCA	Sarcoglycan Alpha	1.18262
DEFB1	Defensin Beta 1	1.17655
ABCG2	ATP Binding Cassette Subfamily G Member 2 (Junior Blood Group)	1.17635
CYP4F2	Cytochrome P450 Family 4 Subfamily F Member 2	1.17496
ACTR2	Actin Related Protein 2	1.17496
MAP3K11	Mitogen-Activated Protein Kinase Kinase Kinase 11	1.17154
GSTM1	Glutathione S-Transferase Mu 1	1.17133
IRF1	Interferon Regulatory Factor 1	1.17005
CD59	CD59 Molecule (CD59 Blood Group)	1.1669
TBX21	T-Box Transcription Factor 21	1.16524
DCAF8	DDB1 And CUL4 Associated Factor 8	1.16131
HRAS	HRas Proto-Oncogene, GTPase	1.16009
ITGB1	Integrin Subunit Beta 1	1.16009
PPIA	Peptidylprolyl Isomerase A	1.16009
STXBP2	Syntaxin Binding Protein 2	1.15687
LIPH	Lipase H	1.15687
LPAR6	Lysophosphatidic Acid Receptor 6	1.15687
TRNT1	TRNA Nucleotidyl Transferase 1	1.15687
MTMR4	Myotubularin Related Protein 4	1.15687
PARD6B	Par-6 Family Cell Polarity Regulator Beta	1.15687
CBFA2T2	CBFA2/RUNX1 Partner Transcriptional Co-Repressor 2	1.15687
KRT74	Keratin 74	1.15687
WDR61	WD Repeat Domain 61	1.15687
FAM126A	Family With Sequence Similarity 126 Member A	1.15687
TTC7B	Tetratricopeptide Repeat Domain 7B	1.15687
KRT27	Keratin 27	1.15687
MTREX	Mtr4 Exosome RNA Helicase	1.15687
ACTC1	Actin Alpha Cardiac Muscle 1	1.15536
PTK2	Protein Tyrosine Kinase 2	1.15329
UGT1A1	UDP Glucuronosyltransferase Family 1 Member A1	1.14952
TJP2	Tight Junction Protein 2	1.14753
DNM3	Dynamin 3	1.14691
CYP1B1	Cytochrome P450 Family 1 Subfamily B Member 1	1.14462
TCF3	Transcription Factor 3	1.14462
SEPTIN9	Septin 9	1.14462
TLR1	Toll Like Receptor 1	1.14448
MYO1C	Myosin IC	1.14448
DDX1	DEAD-Box Helicase 1	1.14338
RTRAF	RNA Transcription, Translation And Transport Factor	1.14338
AIFM1	Apoptosis Inducing Factor Mitochondria Associated 1	1.14039
OMP	Olfactory Marker Protein	1.13967
AQP1	Aquaporin 1 (Colton Blood Group)	1.13858
KAT5	Lysine Acetyltransferase 5	1.13822
RAB1B	RAB1B, Member RAS Oncogene Family	1.13822
FAU	FAU Ubiquitin Like And Ribosomal Protein S30 Fusion	1.13822
COPS8	COP9 Signalosome Subunit 8	1.13822
DRAP1	DR1 Associated Protein 1	1.13822
VAMP3	Vesicle Associated Membrane Protein 3	1.13698
DNM2	Dynamin 2	1.13516
HTR1A	5-Hydroxytryptamine Receptor 1A	1.13377
CES1	Carboxylesterase 1	1.1289
FAH	Fumarylacetoacetate Hydrolase	1.12818
GPX1	Glutathione Peroxidase 1	1.12818
LRP1	LDL Receptor Related Protein 1	1.1272
KNG1	Kininogen 1	1.1272
CD81	CD81 Molecule	1.1272
APOH	Apolipoprotein H	1.12704
CD34	CD34 Molecule	1.12704
F11R	F11 Receptor	1.12488
SCO2	Synthesis Of Cytochrome C Oxidase 2	1.12477
TOMM40	Translocase Of Outer Mitochondrial Membrane 40	1.12477
MAP2K1	Mitogen-Activated Protein Kinase Kinase 1	1.12378
ABAT	4-Aminobutyrate Aminotransferase	1.12355
SLC19A1	Solute Carrier Family 19 Member 1	1.1223
MAT2A	Methionine Adenosyltransferase 2A	1.11962
GATA3	GATA Binding Protein 3	1.11742
MUC1	Mucin 1, Cell Surface Associated	1.11533
NTRK2	Neurotrophic Receptor Tyrosine Kinase 2	1.11299
CNR1	Cannabinoid Receptor 1	1.1122
IGF1R	Insulin Like Growth Factor 1 Receptor	1.11192
LCAT	Lecithin-Cholesterol Acyltransferase	1.10987
DPM1	Dolichyl-Phosphate Mannosyltransferase Subunit 1, Catalytic	1.10878
VASH1	Vasohibin 1	1.10808
OPRD1	Opioid Receptor Delta 1	1.10771
CCND2	Cyclin D2	1.10346
PIK3R1	Phosphoinositide-3-Kinase Regulatory Subunit 1	1.10292
FSHR	Follicle Stimulating Hormone Receptor	1.10186
IFIH1	Interferon Induced With Helicase C Domain 1	1.09326
SLC7A11	Solute Carrier Family 7 Member 11	1.09212
GRIN1	Glutamate Ionotropic Receptor NMDA Type Subunit 1	1.09066
ITPKC	Inositol-Trisphosphate 3-Kinase C	1.08985
FNBP1	Formin Binding Protein 1	1.0895
HMGB1	High Mobility Group Box 1	1.08907
PML	PML Nuclear Body Scaffold	1.08907
SHBG	Sex Hormone Binding Globulin	1.08907
APCS	Amyloid P Component, Serum	1.08596
LAMA2	Laminin Subunit Alpha 2	1.08406
CDKN1B	Cyclin Dependent Kinase Inhibitor 1B	1.08384
ERCC3	ERCC Excision Repair 3, TFIIH Core Complex Helicase Subunit	1.08288
KCNMA1	Potassium Calcium-Activated Channel Subfamily M Alpha 1	1.07879
RELN	Reelin	1.07879
KDR	Kinase Insert Domain Receptor	1.07754
U2AF1	U2 Small Nuclear RNA Auxiliary Factor 1	1.07658
SNORA1	Small Nucleolar RNA, H/ACA Box 1	1.07658
MIP	Major Intrinsic Protein Of Lens Fiber	1.07647
IGF2R	Insulin Like Growth Factor 2 Receptor	1.07606
PCSK1	Proprotein Convertase Subtilisin/Kexin Type 1	1.0755
ACTG1	Actin Gamma 1	1.07264
PLG	Plasminogen	1.06932
CYP1A2	Cytochrome P450 Family 1 Subfamily A Member 2	1.06932
TKT	Transketolase	1.06638
DAB1	DAB Adaptor Protein 1	1.06638
NDRG2	NDRG Family Member 2	1.06638
NR3C1	Nuclear Receptor Subfamily 3 Group C Member 1	1.06582
IGFBP1	Insulin Like Growth Factor Binding Protein 1	1.06582
M6PR	Mannose-6-Phosphate Receptor, Cation Dependent	1.06437
ELOVL6	ELOVL Fatty Acid Elongase 6	1.06417
SLC35C2	Solute Carrier Family 35 Member C2	1.06417
TBC1D20	TBC1 Domain Family Member 20	1.06417
PNMA2	PNMA Family Member 2	1.06417
PGPEP1	Pyroglutamyl-Peptidase I	1.06417
IGLON5	IgLON Family Member 5	1.06417
MVB12A	Multivesicular Body Subunit 12A	1.06417
SERPINA1	Serpin Family A Member 1	1.06136
NR1H4	Nuclear Receptor Subfamily 1 Group H Member 4	1.06136
AP2M1	Adaptor Related Protein Complex 2 Subunit Mu 1	1.06136
CD63	CD63 Molecule	1.06136
RAD18	RAD18 E3 Ubiquitin Protein Ligase	1.06131
SLC3A2	Solute Carrier Family 3 Member 2	1.06131
CABIN1	Calcineurin Binding Protein 1	1.06118
GNG2	G Protein Subunit Gamma 2	1.06118
NACC1	Nucleus Accumbens Associated 1	1.06118
GNG5	G Protein Subunit Gamma 5	1.06118
GNG7	G Protein Subunit Gamma 7	1.06118
SLC1A1	Solute Carrier Family 1 Member 1	1.06069
SELP	Selectin P	1.05857
STK11	Serine/Threonine Kinase 11	1.05795
LGALS3	Galectin 3	1.05795
EFEMP2	EGF Containing Fibulin Extracellular Matrix Protein 2	1.05777
XYLT2	Xylosyltransferase 2	1.05777
MLPH	Melanophilin	1.05777
MUS81	MUS81 Structure-Specific Endonuclease Subunit	1.05777
SCYL1	SCY1 Like Pseudokinase 1	1.05777
DPF2	Double PHD Fingers 2	1.05777
KLC2	Kinesin Light Chain 2	1.05777
SART1	Spliceosome Associated Factor 1, Recruiter Of U4/U6.U5 Tri-SnRNP	1.05777
SOCS5	Suppressor Of Cytokine Signaling 5	1.05777
POLA2	DNA Polymerase Alpha 2, Accessory Subunit	1.05777
PPP1R9B	Protein Phosphatase 1 Regulatory Subunit 9B	1.05777
RNASEH2C	Ribonuclease H2 Subunit C	1.05777
BRMS1	BRMS1 Transcriptional Repressor And Anoikis Regulator	1.05777
CD248	CD248 Molecule	1.05777
MRPL11	Mitochondrial Ribosomal Protein L11	1.05777
ATG2A	Autophagy Related 2A	1.05777
NTMT1	N-Terminal Xaa-Pro-Lys N-Methyltransferase 1	1.05777
SNX32	Sorting Nexin 32	1.05777
NAALADL1	N-Acetylated Alpha-Linked Acidic Dipeptidase Like 1	1.05777
ASB6	Ankyrin Repeat And SOCS Box Containing 6	1.05777
ZFPL1	Zinc Finger Protein Like 1	1.05777
C11orf68	Chromosome 11 Open Reading Frame 68	1.05777
EHBP1L1	EH Domain Binding Protein 1 Like 1	1.05777
PRRX2	Paired Related Homeobox 2	1.05777
YIF1A	Yip1 Interacting Factor Homolog A, Membrane Trafficking Protein	1.05777
CCDC85B	Coiled-Coil Domain Containing 85B	1.05777
EIF1AD	Eukaryotic Translation Initiation Factor 1A Domain Containing	1.05777
FRMD8	FERM Domain Containing 8	1.05777
AP5B1	Adaptor Related Protein Complex 5 Subunit Beta 1	1.05777
TMEM92	Transmembrane Protein 92	1.05777
FAM117A	Family With Sequence Similarity 117 Member A	1.05777
TSGA10IP	Testis Specific 10 Interacting Protein	1.05777
ZNRD2	Zinc Ribbon Domain Containing 2	1.05777
IER5L	Immediate Early Response 5 Like	1.05777
PCNX3	Pecanex 3	1.05777
CLXN	Calaxin	1.05777
H1-9P	H1.9 Linker Histone, Pseudogene	1.05777
TMEM92-AS1	TMEM92 Antisense RNA 1	1.05777
LOC101929268	Uncharacterized LOC101929268	1.05777
ZNRD2-DT	ZNRD2 Divergent Transcript	1.05777
ENSG00000245156	Novel Transcript	1.05777
ENSG00000250751	Novel Transcript	1.05777
ENSG00000253730	Novel Transcript	1.05777
ENSG00000254461	Novel Transcript	1.05777
ENSG00000255038	Novel Transcript, Antisense To SF3B2	1.05777
ENSG00000255320	Novel Transcript	1.05777
ENSG00000262837	Novel Transcript	1.05777
KLC2-AS1	KLC2 Antisense RNA 1	1.05777
ENSG00000204584	Novel Transcript, Antisense To TAC4	1.05777
FCN2	Ficolin 2	1.05652
NMNAT2	Nicotinamide Nucleotide Adenylyltransferase 2	1.05652
CIITA	Class II Major Histocompatibility Complex Transactivator	1.05402
IK	IK Cytokine	1.05388
ZBTB11	Zinc Finger And BTB Domain Containing 11	1.05388
IKBKB	Inhibitor Of Nuclear Factor Kappa B Kinase Subunit Beta	1.05341
IGF2	Insulin Like Growth Factor 2	1.05341
LRP8	LDL Receptor Related Protein 8	1.05332
TG	Thyroglobulin	1.05253
CBS	Cystathionine Beta-Synthase	1.04937
PRKCA	Protein Kinase C Alpha	1.04557
AGT	Angiotensinogen	1.04557
VEGFC	Vascular Endothelial Growth Factor C	1.04557
APLN	Apelin	1.04557
FASN	Fatty Acid Synthase	1.04216
SLC15A1	Solute Carrier Family 15 Member 1	1.03977
P2RY1	Purinergic Receptor P2Y1	1.03952
SMAD7	SMAD Family Member 7	1.03668
MYO9B	Myosin IXB	1.0307
FCGR2A	Fc Gamma Receptor IIa	1.03048
MEN1	Menin 1	1.02983
ARID1A	AT-Rich Interaction Domain 1A	1.02983
RPL11	Ribosomal Protein L11	1.02905
NPL	N-Acetylneuraminate Pyruvate Lyase	1.02682
CARD6	Caspase Recruitment Domain Family Member 6	1.02682
PPM1L	Protein Phosphatase, Mg2+/Mn2+ Dependent 1L	1.02682
ADGRE3	Adhesion G Protein-Coupled Receptor E3	1.02682
NR3C2	Nuclear Receptor Subfamily 3 Group C Member 2	1.02655
VAC14	VAC14 Component Of PIKFYVE Complex	1.02589
DNM1	Dynamin 1	1.02499
BCL6	BCL6 Transcription Repressor	1.02499
FGF7	Fibroblast Growth Factor 7	1.02499
UPF1	UPF1 RNA Helicase And ATPase	1.02499
ADORA2B	Adenosine A2b Receptor	1.02482
MYCN	MYCN Proto-Oncogene, BHLH Transcription Factor	1.02482
OXTR	Oxytocin Receptor	1.02482
CISH	Cytokine Inducible SH2 Containing Protein	1.02482
HAND1	Heart And Neural Crest Derivatives Expressed 1	1.02482
MIRLET7A1	MicroRNA Let-7a-1	1.02482
TIMP1	TIMP Metallopeptidase Inhibitor 1	1.02443
IAPP	Islet Amyloid Polypeptide	1.0211
ALPP	Alkaline Phosphatase, Placental	1.01185
PLA2G1B	Phospholipase A2 Group IB	1.01167
GNAS	GNAS Complex Locus	1.00941
SPARC	Secreted Protein Acidic And Cysteine Rich	1.00903
PIEZO1	Piezo Type Mechanosensitive Ion Channel Component 1	1.00903
PIEZO2	Piezo Type Mechanosensitive Ion Channel Component 2	1.00903
MIR32	MicroRNA 32	1.00903
PAX6	Paired Box 6	1.00726
RUNX2	RUNX Family Transcription Factor 2	1.006
LBR	Lamin B Receptor	1.00555
UGT1A10	UDP Glucuronosyltransferase Family 1 Member A10	1.00242
APOA2	Apolipoprotein A2	1.00211
