# Supplementary material for: Potential pharmacological mechanisms of four active compounds of Macleaya cordata extract against enteritis based on network pharmacology and molecular docking technology
Source: Front Physiol. 2023 May 2;14:1175227. doi: 10.3389/fphys.2023.1175227 (PMC10185776; doi:10.3389/fphys.2023.1175227)
Supplement: Supplementary file 2 [file Table3.XLSX]

## Sheet: 70 targets of MCE and enteritis
Proteins	Gene
Transthyretin	TTR
Albumin	ALB
Protein kinase C theta type	PRKCQ
Interleukin-2	IL2
Mast/stem cell growth factor receptor Kit	KIT
Insulin-like growth factor I	IGF1
Peroxisome proliferator-activated receptor gamma	PPARG
Flavin reductase (NADPH)	BLVRB
Signal transducer and activator of transcription 1-alpha/beta	STAT1
Tyrosine-protein kinase BTK	BTK
Vitamin D3 receptor	VDR
Retinol-binding protein 4	RBP4
Elastase, Neutrophil Expressed	ELANE
Matrix Metallopeptidase 9	MMP9
Protein Tyrosine Phosphatase Non-Receptor Type 1	PTPN1
AKT Serine/Threonine Kinase 1	AKT1
Caspase 1	CASP1
Janus Kinase 2	JAK2
Ribonuclease A Family Member 3	RNASE3
Lipocalin 2	LCN2
Epidermal Growth Factor Receptor	EGFR
Coagulation Factor II, Thrombin	F2
Cyclin Dependent Kinase 2	CDK2
Dihydrofolate Reductase	DHFR
Insulin Receptor	INSR
Transforming Growth Factor Beta Receptor 1	TGFBR1
Transforming Growth Factor Beta 2	TGFB2
Caspase 3	CASP3
Estrogen Receptor 1	ESR1
Bone Morphogenetic Protein 2	BMP2
Ornithine Transcarbamylase	OTC
Matrix Metallopeptidase 2	MMP2
S100 Calcium Binding Protein A9	S100A9
Nitric Oxide Synthase 2	NOS2
Nicotinamide Nucleotide Adenylyltransferase 1	NMNAT1
Mitogen-Activated Protein Kinase 1	MAPK1
Matrix Metallopeptidase 3	MMP3
Macrophage Migration Inhibitory Factor	MIF
Glutathione-Disulfide Reductase	GSR
Butyrylcholinesterase	BCHE
Heat Shock Protein 90 Alpha Family Class A Member 1	HSP90AA1
Nuclear Receptor Subfamily 1 Group H Member 2	NR1H2
C-C Motif Chemokine Ligand 5	CCL5
Renin	REN
Superoxide Dismutase 2	SOD2
Nitric Oxide Synthase 3	NOS3
Cyclin Dependent Kinase 6	CDK6
Membrane Metalloendopeptidase	MME
Triosephosphate Isomerase 1	TPI1
Beta-Secretase 1	BACE1
Androgen Receptor	AR
Mitogen-Activated Protein Kinase 10	MAPK10
Fatty Acid Binding Protein 7	FABP7
Arginase 1	ARG1
Glutathione S-Transferase Mu 1	GSTM1
HRas Proto-Oncogene, GTPase	HRAS
Peptidylprolyl Isomerase A	PPIA
Protein Tyrosine Kinase 2	PTK2
Carboxylesterase 1	CES1
Mitogen-Activated Protein Kinase Kinase 1	MAP2K1
Insulin Like Growth Factor 1 Receptor	IGF1R
Sex Hormone Binding Globulin	SHBG
Kinase Insert Domain Receptor	KDR
Plasminogen	PLG
Nuclear Receptor Subfamily 3 Group C Member 1	NR3C1
Serpin Family A Member 1	SERPINA1
Nuclear Receptor Subfamily 1 Group H Member 4	NR1H4
Cystathionine Beta-Synthase	CBS
Nuclear Receptor Subfamily 3 Group C Member 2	NR3C2
Apolipoprotein A2	APOA2
