# Supplementary material for: Potential pharmacological mechanisms of four active compounds of Macleaya cordata extract against enteritis based on network pharmacology and molecular docking technology
Source: Front Physiol. 2023 May 2;14:1175227. doi: 10.3389/fphys.2023.1175227 (PMC10185776; doi:10.3389/fphys.2023.1175227)
Supplement: Supplementary file 3 [file Table4.XLSX]

## Sheet: The result of GO analysis
Type	Description	LogP	#GeneInHitList	#GeneInGOAndHitList	GeneID	Hits
Biological Process	positive regulation of transferase activity	-21.3197	49	20	207|1956|1991|2147|3265|3320|3479|3480|3558|3643|3717|3791|3815|5478|5588|5594|5604|5747|5770|7042	AKT1|EGFR|ELANE|F2|HRAS|HSP90AA1|IGF1|IGF1R|IL2|INSR|JAK2|KDR|KIT|PPIA|PRKCQ|MAPK1|MAP2K1|PTK2|PTPN1|TGFB2
Biological Process	positive regulation of kinase activity	-19.5051	49	18	207|1956|1991|2147|3265|3320|3479|3480|3558|3643|3717|3791|3815|5478|5604|5747|5770|7042	AKT1|EGFR|ELANE|F2|HRAS|HSP90AA1|IGF1|IGF1R|IL2|INSR|JAK2|KDR|KIT|PPIA|MAP2K1|PTK2|PTPN1|TGFB2
Biological Process	positive regulation of protein phosphorylation	-19.1512	49	20	207|1956|1991|2147|3265|3320|3479|3558|3643|3717|3791|3815|4318|5478|5594|5604|5747|5770|7042|7046	AKT1|EGFR|ELANE|F2|HRAS|HSP90AA1|IGF1|IL2|INSR|JAK2|KDR|KIT|MMP9|PPIA|MAPK1|MAP2K1|PTK2|PTPN1|TGFB2|TGFBR1
Biological Process	regulation of kinase activity	-17.3243	49	19	207|836|1956|1991|2147|3265|3320|3479|3480|3558|3643|3717|3791|3815|5478|5604|5747|5770|7042	AKT1|CASP3|EGFR|ELANE|F2|HRAS|HSP90AA1|IGF1|IGF1R|IL2|INSR|JAK2|KDR|KIT|PPIA|MAP2K1|PTK2|PTPN1|TGFB2
Biological Process	positive regulation of cell migration	-16.9702	49	17	207|1956|3265|3479|3480|3643|3717|3791|3815|4313|4318|4846|5594|5747|6648|7042|7046	AKT1|EGFR|HRAS|IGF1|IGF1R|INSR|JAK2|KDR|KIT|MMP2|MMP9|NOS3|MAPK1|PTK2|SOD2|TGFB2|TGFBR1
Biological Process	positive regulation of cell motility	-16.6666	49	17	207|1956|3265|3479|3480|3643|3717|3791|3815|4313|4318|4846|5594|5747|6648|7042|7046	AKT1|EGFR|HRAS|IGF1|IGF1R|INSR|JAK2|KDR|KIT|MMP2|MMP9|NOS3|MAPK1|PTK2|SOD2|TGFB2|TGFBR1
Biological Process	positive regulation of cellular component movement	-16.5075	49	17	207|1956|3265|3479|3480|3643|3717|3791|3815|4313|4318|4846|5594|5747|6648|7042|7046	AKT1|EGFR|HRAS|IGF1|IGF1R|INSR|JAK2|KDR|KIT|MMP2|MMP9|NOS3|MAPK1|PTK2|SOD2|TGFB2|TGFBR1
Biological Process	positive regulation of locomotion	-16.4834	49	17	207|1956|3265|3479|3480|3643|3717|3791|3815|4313|4318|4846|5594|5747|6648|7042|7046	AKT1|EGFR|HRAS|IGF1|IGF1R|INSR|JAK2|KDR|KIT|MMP2|MMP9|NOS3|MAPK1|PTK2|SOD2|TGFB2|TGFBR1
Biological Process	protein phosphorylation	-15.3225	49	17	207|695|1017|1021|1956|3480|3643|3717|3791|3815|5588|5594|5602|5604|5747|7042|7046	AKT1|BTK|CDK2|CDK6|EGFR|IGF1R|INSR|JAK2|KDR|KIT|PRKCQ|MAPK1|MAPK10|MAP2K1|PTK2|TGFB2|TGFBR1
Biological Process	enzyme-linked receptor protein signaling pathway	-14.9863	49	16	207|836|1956|3479|3480|3643|3717|3791|3815|4313|4318|5594|5747|5770|7042|7046	AKT1|CASP3|EGFR|IGF1|IGF1R|INSR|JAK2|KDR|KIT|MMP2|MMP9|MAPK1|PTK2|PTPN1|TGFB2|TGFBR1
Biological Process	positive regulation of MAPK cascade	-14.9352	49	15	367|1956|1991|3265|3479|3480|3643|3717|3791|3815|5478|5604|5770|7042|7046	AR|EGFR|ELANE|HRAS|IGF1|IGF1R|INSR|JAK2|KDR|KIT|PPIA|MAP2K1|PTPN1|TGFB2|TGFBR1
Biological Process	regulation of phosphatidylinositol 3-kinase signaling	-14.7046	49	10	1956|2147|3479|3480|3643|3717|3791|3815|5747|7042	EGFR|F2|IGF1|IGF1R|INSR|JAK2|KDR|KIT|PTK2|TGFB2
Biological Process	transmembrane receptor protein tyrosine kinase signaling pathway	-14.6681	49	14	207|836|1956|3479|3480|3643|3717|3791|3815|4313|4318|5594|5747|5770	AKT1|CASP3|EGFR|IGF1|IGF1R|INSR|JAK2|KDR|KIT|MMP2|MMP9|MAPK1|PTK2|PTPN1
Biological Process	positive regulation of protein kinase activity	-14.6092	49	14	207|1956|1991|3265|3320|3479|3643|3717|3815|5478|5604|5747|5770|7042	AKT1|EGFR|ELANE|HRAS|HSP90AA1|IGF1|INSR|JAK2|KIT|PPIA|MAP2K1|PTK2|PTPN1|TGFB2
Biological Process	positive regulation of phosphatidylinositol 3-kinase signaling	-14.1697	49	9	2147|3479|3480|3643|3717|3791|3815|5747|7042	F2|IGF1|IGF1R|INSR|JAK2|KDR|KIT|PTK2|TGFB2
Biological Process	regulation of MAPK cascade	-14.1313	49	16	367|1956|1991|3265|3479|3480|3643|3717|3791|3815|5478|5594|5604|5770|7042|7046	AR|EGFR|ELANE|HRAS|IGF1|IGF1R|INSR|JAK2|KDR|KIT|PPIA|MAPK1|MAP2K1|PTPN1|TGFB2|TGFBR1
Biological Process	regulation of protein kinase activity	-13.0757	49	15	207|836|1956|1991|3265|3320|3479|3643|3717|3815|5478|5604|5747|5770|7042	AKT1|CASP3|EGFR|ELANE|HRAS|HSP90AA1|IGF1|INSR|JAK2|KIT|PPIA|MAP2K1|PTK2|PTPN1|TGFB2
Biological Process	peptidyl-tyrosine phosphorylation	-11.7077	49	9	695|1956|3480|3643|3717|3791|3815|5604|5747	BTK|EGFR|IGF1R|INSR|JAK2|KDR|KIT|MAP2K1|PTK2
Biological Process	peptidyl-tyrosine modification	-11.6275	49	9	695|1956|3480|3643|3717|3791|3815|5604|5747	BTK|EGFR|IGF1R|INSR|JAK2|KDR|KIT|MAP2K1|PTK2
Biological Process	heart development	-11.6066	49	13	836|3480|3643|3791|4313|4846|5594|5604|5747|5950|6648|7042|7046	CASP3|IGF1R|INSR|KDR|MMP2|NOS3|MAPK1|MAP2K1|PTK2|RBP4|SOD2|TGFB2|TGFBR1
Biological Process	protein autophosphorylation	-10.7373	49	9	207|695|1956|3480|3643|3717|3791|3815|5747	AKT1|BTK|EGFR|IGF1R|INSR|JAK2|KDR|KIT|PTK2
Biological Process	positive regulation of protein serine/threonine kinase activity	-8.55167	49	8	207|1956|1991|3265|3643|3815|5604|5770	AKT1|EGFR|ELANE|HRAS|INSR|KIT|MAP2K1|PTPN1
Biological Process	regulation of protein serine/threonine kinase activity	-7.94475	49	9	207|836|1956|1991|3265|3643|3815|5604|5770	AKT1|CASP3|EGFR|ELANE|HRAS|INSR|KIT|MAP2K1|PTPN1
Biological Process	positive regulation of MAP kinase activity	-7.46271	49	6	1956|1991|3265|3643|3815|5770	EGFR|ELANE|HRAS|INSR|KIT|PTPN1
Biological Process	regulation of MAP kinase activity	-6.2892	49	6	1956|1991|3265|3643|3815|5770	EGFR|ELANE|HRAS|INSR|KIT|PTPN1
Biological Process	reproductive structure development	-19.0162	49	17	207|367|836|1956|2099|3643|3791|3815|4313|4846|5340|5594|5604|5747|5950|7042|7046	AKT1|AR|CASP3|EGFR|ESR1|INSR|KDR|KIT|MMP2|NOS3|PLG|MAPK1|MAP2K1|PTK2|RBP4|TGFB2|TGFBR1
Biological Process	reproductive system development	-18.9643	49	17	207|367|836|1956|2099|3643|3791|3815|4313|4846|5340|5594|5604|5747|5950|7042|7046	AKT1|AR|CASP3|EGFR|ESR1|INSR|KDR|KIT|MMP2|NOS3|PLG|MAPK1|MAP2K1|PTK2|RBP4|TGFB2|TGFBR1
Biological Process	sex differentiation	-12.1855	49	11	367|836|2099|3643|3791|3815|4313|4846|5950|7042|7046	AR|CASP3|ESR1|INSR|KDR|KIT|MMP2|NOS3|RBP4|TGFB2|TGFBR1
Biological Process	gonad development	-11.6577	49	10	367|836|2099|3643|3791|3815|4313|4846|7042|7046	AR|CASP3|ESR1|INSR|KDR|KIT|MMP2|NOS3|TGFB2|TGFBR1
Biological Process	development of primary sexual characteristics	-11.5606	49	10	367|836|2099|3643|3791|3815|4313|4846|7042|7046	AR|CASP3|ESR1|INSR|KDR|KIT|MMP2|NOS3|TGFB2|TGFBR1
Biological Process	female sex differentiation	-9.0859	49	7	836|2099|3791|3815|4313|4846|5950	CASP3|ESR1|KDR|KIT|MMP2|NOS3|RBP4
Biological Process	ovulation cycle	-8.83138	49	6	836|2099|3480|4313|4846|7042	CASP3|ESR1|IGF1R|MMP2|NOS3|TGFB2
Biological Process	tube morphogenesis	-8.14342	49	11	207|367|836|1956|2099|3791|4313|4846|5747|7042|7046	AKT1|AR|CASP3|EGFR|ESR1|KDR|MMP2|NOS3|PTK2|TGFB2|TGFBR1
Biological Process	rhythmic process	-7.96796	49	8	836|2099|3480|4313|4843|4846|5602|7042	CASP3|ESR1|IGF1R|MMP2|NOS2|NOS3|MAPK10|TGFB2
Biological Process	female gonad development	-7.90324	49	6	836|2099|3791|3815|4313|4846	CASP3|ESR1|KDR|KIT|MMP2|NOS3
Biological Process	ovulation cycle process	-7.82935	49	5	836|2099|4313|4846|7042	CASP3|ESR1|MMP2|NOS3|TGFB2
Biological Process	development of primary female sexual characteristics	-7.79841	49	6	836|2099|3791|3815|4313|4846	CASP3|ESR1|KDR|KIT|MMP2|NOS3
Biological Process	tissue morphogenesis	-6.60745	49	9	367|836|1956|2099|3791|4313|4846|7042|7046	AR|CASP3|EGFR|ESR1|KDR|MMP2|NOS3|TGFB2|TGFBR1
Biological Process	ovarian follicle development	-5.70712	49	4	2099|3791|3815|4313	ESR1|KDR|KIT|MMP2
Biological Process	response to hormone	-19.0147	49	20	207|367|383|590|836|2099|2908|3480|3643|3717|3815|4306|4313|4843|4846|5009|5747|5770|6772|7042	AKT1|AR|ARG1|BCHE|CASP3|ESR1|NR3C1|IGF1R|INSR|JAK2|KIT|NR3C2|MMP2|NOS2|NOS3|OTC|PTK2|PTPN1|STAT1|TGFB2
Biological Process	cellular response to nitrogen compound	-13.2691	49	15	207|383|836|1017|1956|3479|3480|3643|3717|4313|4314|5594|5747|5770|6772	AKT1|ARG1|CASP3|CDK2|EGFR|IGF1|IGF1R|INSR|JAK2|MMP2|MMP3|MAPK1|PTK2|PTPN1|STAT1
Biological Process	response to peptide	-12.7262	49	13	207|383|3479|3480|3643|3717|4313|4314|4318|5009|5747|5770|6772	AKT1|ARG1|IGF1|IGF1R|INSR|JAK2|MMP2|MMP3|MMP9|OTC|PTK2|PTPN1|STAT1
Biological Process	cellular response to hormone stimulus	-12.249	49	13	207|367|383|2099|2908|3480|3643|3717|3815|4306|5747|5770|6772	AKT1|AR|ARG1|ESR1|NR3C1|IGF1R|INSR|JAK2|KIT|NR3C2|PTK2|PTPN1|STAT1
Biological Process	cellular response to organonitrogen compound	-11.2284	49	13	207|383|836|1956|3479|3480|3643|3717|4313|5594|5747|5770|6772	AKT1|ARG1|CASP3|EGFR|IGF1|IGF1R|INSR|JAK2|MMP2|MAPK1|PTK2|PTPN1|STAT1
Biological Process	cellular response to peptide	-8.85342	49	9	207|383|3479|3480|3643|3717|5747|5770|6772	AKT1|ARG1|IGF1|IGF1R|INSR|JAK2|PTK2|PTPN1|STAT1
Biological Process	cellular response to peptide hormone stimulus	-8.34514	49	8	207|383|3480|3643|3717|5747|5770|6772	AKT1|ARG1|IGF1R|INSR|JAK2|PTK2|PTPN1|STAT1
Biological Process	response to peptide hormone	-8.28941	49	9	207|383|3480|3643|3717|5009|5747|5770|6772	AKT1|ARG1|IGF1R|INSR|JAK2|OTC|PTK2|PTPN1|STAT1
Biological Process	response to insulin	-5.97662	49	6	207|3480|3643|5009|5770|6772	AKT1|IGF1R|INSR|OTC|PTPN1|STAT1
Biological Process	insulin receptor signaling pathway	-5.55443	49	4	207|3480|3643|5770	AKT1|IGF1R|INSR|PTPN1
Biological Process	cellular response to insulin stimulus	-5.35889	49	5	207|3480|3643|5770|6772	AKT1|IGF1R|INSR|PTPN1|STAT1
Biological Process	glucose homeostasis	-3.47954	49	4	207|3480|3643|5950	AKT1|IGF1R|INSR|RBP4
Biological Process	carbohydrate homeostasis	-3.47145	49	4	207|3480|3643|5950	AKT1|IGF1R|INSR|RBP4
Biological Process	cellular response to chemical stress	-15.5262	49	13	207|383|695|834|836|1956|3717|4313|4318|4846|5478|5594|6648	AKT1|ARG1|BTK|CASP1|CASP3|EGFR|JAK2|MMP2|MMP9|NOS3|PPIA|MAPK1|SOD2
Biological Process	response to inorganic substance	-14.5703	49	15	207|383|836|1017|1956|3791|3815|4313|4314|4318|4846|5009|5594|6648|6772	AKT1|ARG1|CASP3|CDK2|EGFR|KDR|KIT|MMP2|MMP3|MMP9|NOS3|OTC|MAPK1|SOD2|STAT1
Biological Process	response to reactive oxygen species	-14.4746	49	11	207|383|695|836|1956|4313|4318|4846|5594|6648|6772	AKT1|ARG1|BTK|CASP3|EGFR|MMP2|MMP9|NOS3|MAPK1|SOD2|STAT1
Biological Process	response to oxidative stress	-13.7735	49	13	207|383|695|836|1956|3717|4313|4318|4846|5478|5594|6648|6772	AKT1|ARG1|BTK|CASP3|EGFR|JAK2|MMP2|MMP9|NOS3|PPIA|MAPK1|SOD2|STAT1
Biological Process	cellular response to oxidative stress	-13.2851	49	11	207|383|695|1956|3717|4313|4318|4846|5478|5594|6648	AKT1|ARG1|BTK|EGFR|JAK2|MMP2|MMP9|NOS3|PPIA|MAPK1|SOD2
Biological Process	cellular response to reactive oxygen species	-12.552	49	9	207|383|695|1956|4313|4318|4846|5594|6648	AKT1|ARG1|BTK|EGFR|MMP2|MMP9|NOS3|MAPK1|SOD2
Biological Process	response to cadmium ion	-11.2177	49	7	207|383|1956|3815|4318|5594|6648	AKT1|ARG1|EGFR|KIT|MMP9|MAPK1|SOD2
Biological Process	response to lipopolysaccharide	-10.0799	49	10	207|383|834|836|1991|3717|4843|4846|5594|6648	AKT1|ARG1|CASP1|CASP3|ELANE|JAK2|NOS2|NOS3|MAPK1|SOD2
Biological Process	response to molecule of bacterial origin	-9.80905	49	10	207|383|834|836|1991|3717|4843|4846|5594|6648	AKT1|ARG1|CASP1|CASP3|ELANE|JAK2|NOS2|NOS3|MAPK1|SOD2
Biological Process	response to bacterium	-8.81603	49	12	207|383|834|836|1991|2147|3717|3934|4843|4846|5594|6648	AKT1|ARG1|CASP1|CASP3|ELANE|F2|JAK2|LCN2|NOS2|NOS3|MAPK1|SOD2
Biological Process	cellular response to biotic stimulus	-8.33088	49	8	207|383|695|834|3717|4843|4846|5594	AKT1|ARG1|BTK|CASP1|JAK2|NOS2|NOS3|MAPK1
Biological Process	response to metal ion	-8.32149	49	9	207|383|836|1956|3815|4318|5009|5594|6648	AKT1|ARG1|CASP3|EGFR|KIT|MMP9|OTC|MAPK1|SOD2
Biological Process	cellular response to lipopolysaccharide	-7.46663	49	7	207|383|834|3717|4843|4846|5594	AKT1|ARG1|CASP1|JAK2|NOS2|NOS3|MAPK1
Biological Process	cellular response to molecule of bacterial origin	-7.29321	49	7	207|383|834|3717|4843|4846|5594	AKT1|ARG1|CASP1|JAK2|NOS2|NOS3|MAPK1
Biological Process	cellular response to cytokine stimulus	-6.75922	49	10	207|383|695|834|3717|3815|4313|4843|5594|6772	AKT1|ARG1|BTK|CASP1|JAK2|KIT|MMP2|NOS2|MAPK1|STAT1
Biological Process	cellular response to lipid	-14.7942	49	15	207|367|383|834|1066|1956|2099|2908|3480|3717|4306|4313|4843|4846|5594	AKT1|AR|ARG1|CASP1|CES1|EGFR|ESR1|NR3C1|IGF1R|JAK2|NR3C2|MMP2|NOS2|NOS3|MAPK1
Biological Process	cellular response to organic cyclic compound	-11.9824	49	13	367|383|836|1066|1956|2099|2908|3480|3717|4306|4313|5594|6772	AR|ARG1|CASP3|CES1|EGFR|ESR1|NR3C1|IGF1R|JAK2|NR3C2|MMP2|MAPK1|STAT1
Biological Process	response to steroid hormone	-10.683	49	10	367|383|590|836|2099|2908|3480|3717|4306|7042	AR|ARG1|BCHE|CASP3|ESR1|NR3C1|IGF1R|JAK2|NR3C2|TGFB2
Biological Process	cellular response to steroid hormone stimulus	-8.41207	49	7	367|383|2099|2908|3480|3717|4306	AR|ARG1|ESR1|NR3C1|IGF1R|JAK2|NR3C2
Biological Process	cellular response to ketone	-7.90324	49	6	207|367|383|2908|3480|3717	AKT1|AR|ARG1|NR3C1|IGF1R|JAK2
Biological Process	intracellular steroid hormone receptor signaling pathway	-7.60773	49	5	367|2099|2908|3717|4306	AR|ESR1|NR3C1|JAK2|NR3C2
Biological Process	response to ketone	-7.55749	49	7	207|367|383|2908|3480|3717|7042	AKT1|AR|ARG1|NR3C1|IGF1R|JAK2|TGFB2
Biological Process	cellular response to dexamethasone stimulus	-7.05029	49	4	383|2908|3480|3717	ARG1|NR3C1|IGF1R|JAK2
Biological Process	response to glucocorticoid	-6.99401	49	6	383|590|836|2908|3480|3717	ARG1|BCHE|CASP3|NR3C1|IGF1R|JAK2
Biological Process	steroid hormone mediated signaling pathway	-6.89944	49	5	367|2099|2908|3717|4306	AR|ESR1|NR3C1|JAK2|NR3C2
Biological Process	response to corticosteroid	-6.61625	49	6	383|590|836|2908|3480|3717	ARG1|BCHE|CASP3|NR3C1|IGF1R|JAK2
Biological Process	response to dexamethasone	-6.22722	49	4	383|2908|3480|3717	ARG1|NR3C1|IGF1R|JAK2
Biological Process	cellular response to glucocorticoid stimulus	-5.7723	49	4	383|2908|3480|3717	ARG1|NR3C1|IGF1R|JAK2
Biological Process	hormone-mediated signaling pathway	-5.69937	49	5	367|2099|2908|3717|4306	AR|ESR1|NR3C1|JAK2|NR3C2
Biological Process	cellular response to corticosteroid stimulus	-5.46908	49	4	383|2908|3480|3717	ARG1|NR3C1|IGF1R|JAK2
Biological Process	intracellular receptor signaling pathway	-5.44623	49	5	367|2099|2908|3717|4306	AR|ESR1|NR3C1|JAK2|NR3C2
Biological Process	regulation of muscle cell apoptotic process	-5.03231	49	4	3479|3480|3717|6648	IGF1|IGF1R|JAK2|SOD2
Biological Process	negative regulation of muscle cell apoptotic process	-4.15379	49	3	3479|3480|3717	IGF1|IGF1R|JAK2
Biological Process	positive regulation of cold-induced thermogenesis	-3.26129	49	3	3480|3717|3934	IGF1R|JAK2|LCN2
Biological Process	regulation of cold-induced thermogenesis	-2.7527	49	3	3480|3717|3934	IGF1R|JAK2|LCN2
Biological Process	gland development	-14.7126	49	14	207|367|383|1956|2099|3643|3717|4313|5009|5594|5604|6648|7042|7046	AKT1|AR|ARG1|EGFR|ESR1|INSR|JAK2|MMP2|OTC|MAPK1|MAP2K1|SOD2|TGFB2|TGFBR1
Biological Process	negative regulation of cell population proliferation	-14.5366	49	17	367|383|590|695|836|1021|3265|3558|3717|4846|5340|5604|5950|6648|6772|7042|7046	AR|ARG1|BCHE|BTK|CASP3|CDK6|HRAS|IL2|JAK2|NOS3|PLG|MAP2K1|RBP4|SOD2|STAT1|TGFB2|TGFBR1
Biological Process	hematopoietic or lymphoid organ development	-10.5717	49	13	695|836|1021|3558|3717|3791|3815|4318|5594|5604|6648|7042|7046	BTK|CASP3|CDK6|IL2|JAK2|KDR|KIT|MMP9|MAPK1|MAP2K1|SOD2|TGFB2|TGFBR1
Biological Process	immune system development	-10.2228	49	13	695|836|1021|3558|3717|3791|3815|4318|5594|5604|6648|7042|7046	BTK|CASP3|CDK6|IL2|JAK2|KDR|KIT|MMP9|MAPK1|MAP2K1|SOD2|TGFB2|TGFBR1
Biological Process	hemopoiesis	-7.39808	49	10	695|836|1021|3558|3717|3791|3815|4318|6648|7042	BTK|CASP3|CDK6|IL2|JAK2|KDR|KIT|MMP9|SOD2|TGFB2
Biological Process	response to wounding	-12.8017	49	13	383|836|2147|3479|3717|3791|4313|5265|5340|5478|6648|7042|7046	ARG1|CASP3|F2|IGF1|JAK2|KDR|MMP2|SERPINA1|PLG|PPIA|SOD2|TGFB2|TGFBR1
Biological Process	wound healing	-8.55457	49	9	836|2147|3479|3791|5265|5340|5478|7042|7046	CASP3|F2|IGF1|KDR|SERPINA1|PLG|PPIA|TGFB2|TGFBR1
Biological Process	regulation of growth	-8.13667	49	11	207|367|1956|2147|3479|3558|3643|5588|5950|7042|7046	AKT1|AR|EGFR|F2|IGF1|IL2|INSR|PRKCQ|RBP4|TGFB2|TGFBR1
Biological Process	positive regulation of growth	-8.03215	49	8	207|1956|2147|3479|3558|3643|7042|7046	AKT1|EGFR|F2|IGF1|IL2|INSR|TGFB2|TGFBR1
Biological Process	positive regulation of cell growth	-7.98862	49	7	207|1956|2147|3479|3558|7042|7046	AKT1|EGFR|F2|IGF1|IL2|TGFB2|TGFBR1
Biological Process	negative regulation of cell differentiation	-7.90726	49	11	1021|1956|2147|3479|3558|4318|5594|6648|6772|7042|7046	CDK6|EGFR|F2|IGF1|IL2|MMP9|MAPK1|SOD2|STAT1|TGFB2|TGFBR1
Biological Process	regulation of cell growth	-6.45298	49	8	207|1956|2147|3479|3558|5588|7042|7046	AKT1|EGFR|F2|IGF1|IL2|PRKCQ|TGFB2|TGFBR1
Biological Process	muscle structure development	-3.89217	49	6	207|836|3479|5340|7042|7046	AKT1|CASP3|IGF1|PLG|TGFB2|TGFBR1
Biological Process	regulation of smooth muscle cell proliferation	-12.7532	49	10	207|1991|3479|3480|3717|4313|4318|4846|6648|6772	AKT1|ELANE|IGF1|IGF1R|JAK2|MMP2|MMP9|NOS3|SOD2|STAT1
Biological Process	positive regulation of smooth muscle cell proliferation	-11.5034	49	8	207|1991|3479|3480|3717|4313|4318|6772	AKT1|ELANE|IGF1|IGF1R|JAK2|MMP2|MMP9|STAT1
Biological Process	regulation of vascular associated smooth muscle cell proliferation	-6.51589	49	5	3479|3717|4313|4318|6648	IGF1|JAK2|MMP2|MMP9|SOD2
Biological Process	positive regulation of vascular associated smooth muscle cell proliferation	-5.98449	49	4	3479|3717|4313|4318	IGF1|JAK2|MMP2|MMP9
Biological Process	regeneration	-3.99363	49	4	3479|3717|4313|5340	IGF1|JAK2|MMP2|PLG
Biological Process	positive regulation of DNA binding	-3.95686	49	3	3479|3717|4318	IGF1|JAK2|MMP9
Biological Process	regulation of interleukin-1 beta production	-3.10384	49	3	834|3479|3717	CASP1|IGF1|JAK2
Biological Process	regulation of DNA binding	-2.99541	49	3	3479|3717|4318	IGF1|JAK2|MMP9
Biological Process	regulation of interleukin-1 production	-2.90562	49	3	834|3479|3717	CASP1|IGF1|JAK2
Biological Process	positive regulation of binding	-2.55908	49	3	3479|3717|4318	IGF1|JAK2|MMP9
Biological Process	positive regulation of response to external stimulus	-11.1801	49	12	383|695|834|2147|3320|3480|3558|3717|3791|5340|5594|5747	ARG1|BTK|CASP1|F2|HSP90AA1|IGF1R|IL2|JAK2|KDR|PLG|MAPK1|PTK2
Biological Process	regulation of cell adhesion	-10.7703	49	14	207|383|836|1021|1991|3479|3558|3717|3791|4313|5340|5588|5747|7042	AKT1|ARG1|CASP3|CDK6|ELANE|IGF1|IL2|JAK2|KDR|MMP2|PLG|PRKCQ|PTK2|TGFB2
Biological Process	regulation of leukocyte proliferation	-9.53749	49	9	383|695|836|3479|3558|3717|5588|5594|5747	ARG1|BTK|CASP3|IGF1|IL2|JAK2|PRKCQ|MAPK1|PTK2
Biological Process	regulation of cell-cell adhesion	-8.37991	49	10	207|383|836|1991|3479|3558|3717|5340|5588|5747	AKT1|ARG1|CASP3|ELANE|IGF1|IL2|JAK2|PLG|PRKCQ|PTK2
Biological Process	negative regulation of cell adhesion	-7.5072	49	8	207|383|836|3558|3717|4313|5340|5747	AKT1|ARG1|CASP3|IL2|JAK2|MMP2|PLG|PTK2
Biological Process	negative regulation of cell-cell adhesion	-7.48157	49	7	207|383|836|3558|3717|5340|5747	AKT1|ARG1|CASP3|IL2|JAK2|PLG|PTK2
Biological Process	positive regulation of cell adhesion	-7.22318	49	9	207|1021|1991|3479|3558|3717|3791|5588|7042	AKT1|CDK6|ELANE|IGF1|IL2|JAK2|KDR|PRKCQ|TGFB2
Biological Process	regulation of lymphocyte proliferation	-7.03874	49	7	383|695|836|3479|3558|3717|5588	ARG1|BTK|CASP3|IGF1|IL2|JAK2|PRKCQ
Biological Process	regulation of mononuclear cell proliferation	-7.00059	49	7	383|695|836|3479|3558|3717|5588	ARG1|BTK|CASP3|IGF1|IL2|JAK2|PRKCQ
Biological Process	regulation of leukocyte cell-cell adhesion	-6.91732	49	8	207|383|836|1991|3479|3558|3717|5588	AKT1|ARG1|CASP3|ELANE|IGF1|IL2|JAK2|PRKCQ
Biological Process	regulation of cell activation	-6.76486	49	10	207|383|695|836|2147|3479|3558|3717|4846|5588	AKT1|ARG1|BTK|CASP3|F2|IGF1|IL2|JAK2|NOS3|PRKCQ
Biological Process	positive regulation of leukocyte proliferation	-6.64828	49	6	3479|3558|3717|5588|5594|5747	IGF1|IL2|JAK2|PRKCQ|MAPK1|PTK2
Biological Process	regulation of production of molecular mediator of immune response	-6.5226	49	6	383|695|3558|3815|5950|7042	ARG1|BTK|IL2|KIT|RBP4|TGFB2
Biological Process	regulation of T cell proliferation	-6.4031	49	6	383|836|3479|3558|3717|5588	ARG1|CASP3|IGF1|IL2|JAK2|PRKCQ
Biological Process	cell activation	-6.06518	49	9	695|1021|2147|3479|3558|3717|3815|5478|7046	BTK|CDK6|F2|IGF1|IL2|JAK2|KIT|PPIA|TGFBR1
Biological Process	regulation of activated T cell proliferation	-6.0226	49	4	383|836|3479|3558	ARG1|CASP3|IGF1|IL2
Biological Process	negative regulation of cell activation	-5.86916	49	6	383|695|836|2147|3558|4846	ARG1|BTK|CASP3|F2|IL2|NOS3
Biological Process	regulation of immune effector process	-5.77609	49	7	383|695|3558|3815|4843|5950|7042	ARG1|BTK|IL2|KIT|NOS2|RBP4|TGFB2
Biological Process	regulation of T cell activation	-5.7122	49	7	207|383|836|3479|3558|3717|5588	AKT1|ARG1|CASP3|IGF1|IL2|JAK2|PRKCQ
Biological Process	regulation of lymphocyte activation	-5.52946	49	8	207|383|695|836|3479|3558|3717|5588	AKT1|ARG1|BTK|CASP3|IGF1|IL2|JAK2|PRKCQ
Biological Process	positive regulation of leukocyte mediated immunity	-5.522	49	5	383|695|3558|3815|4843	ARG1|BTK|IL2|KIT|NOS2
Biological Process	positive regulation of immune effector process	-5.51214	49	6	383|695|3558|3815|4843|5950	ARG1|BTK|IL2|KIT|NOS2|RBP4
Biological Process	regulation of peptidyl-tyrosine phosphorylation	-5.42347	49	6	1956|3479|3558|3717|3815|5770	EGFR|IGF1|IL2|JAK2|KIT|PTPN1
Biological Process	positive regulation of tyrosine phosphorylation of STAT protein	-5.36165	49	4	3479|3558|3717|3815	IGF1|IL2|JAK2|KIT
Biological Process	positive regulation of leukocyte cell-cell adhesion	-5.35675	49	6	207|1991|3479|3558|3717|5588	AKT1|ELANE|IGF1|IL2|JAK2|PRKCQ
Biological Process	negative regulation of immune system process	-5.23678	49	7	207|383|695|836|1021|3558|7042	AKT1|ARG1|BTK|CASP3|CDK6|IL2|TGFB2
Biological Process	regulation of leukocyte activation	-5.01971	49	8	207|383|695|836|3479|3558|3717|5588	AKT1|ARG1|BTK|CASP3|IGF1|IL2|JAK2|PRKCQ
Biological Process	positive regulation of defense response	-5.0165	49	6	383|695|834|3320|3558|3717	ARG1|BTK|CASP1|HSP90AA1|IL2|JAK2
Biological Process	regulation of tyrosine phosphorylation of STAT protein	-5.01111	49	4	3479|3558|3717|3815	IGF1|IL2|JAK2|KIT
Biological Process	regulation of adaptive immune response based on somatic recombination of immune receptors built from immunoglobulin superfamily domains	-4.99502	49	5	383|695|3558|3717|5588	ARG1|BTK|IL2|JAK2|PRKCQ
Biological Process	positive regulation of interleukin-17 production	-4.9928	49	3	3558|3717|5588	IL2|JAK2|PRKCQ
Biological Process	negative regulation of lymphocyte proliferation	-4.9695	49	4	383|695|836|3558	ARG1|BTK|CASP3|IL2
Biological Process	positive regulation of cell-cell adhesion	-4.9525	49	6	207|1991|3479|3558|3717|5588	AKT1|ELANE|IGF1|IL2|JAK2|PRKCQ
Biological Process	negative regulation of mononuclear cell proliferation	-4.94908	49	4	383|695|836|3558	ARG1|BTK|CASP3|IL2
Biological Process	positive regulation of peptidyl-tyrosine phosphorylation	-4.86843	49	5	3479|3558|3717|3815|5770	IGF1|IL2|JAK2|KIT|PTPN1
Biological Process	negative regulation of leukocyte proliferation	-4.83162	49	4	383|695|836|3558	ARG1|BTK|CASP3|IL2
Biological Process	regulation of adaptive immune response	-4.82434	49	5	383|695|3558|3717|5588	ARG1|BTK|IL2|JAK2|PRKCQ
Biological Process	regulation of T-helper 17 type immune response	-4.80123	49	3	3558|3717|5588	IL2|JAK2|PRKCQ
Biological Process	regulation of cytokine production involved in immune response	-4.7044	49	4	383|695|3815|7042	ARG1|BTK|KIT|TGFB2
Biological Process	positive regulation of T cell proliferation	-4.60271	49	4	3479|3558|3717|5588	IGF1|IL2|JAK2|PRKCQ
Biological Process	positive regulation of adaptive immune response based on somatic recombination of immune receptors built from immunoglobulin superfamily domains	-4.47627	49	4	695|3558|3717|5588	BTK|IL2|JAK2|PRKCQ
Biological Process	positive regulation of lymphocyte activation	-4.40204	49	6	207|695|3479|3558|3717|5588	AKT1|BTK|IGF1|IL2|JAK2|PRKCQ
Biological Process	positive regulation of adaptive immune response	-4.40197	49	4	695|3558|3717|5588	BTK|IL2|JAK2|PRKCQ
Biological Process	regulation of leukocyte mediated immunity	-4.39519	49	5	383|695|3558|3815|4843	ARG1|BTK|IL2|KIT|NOS2
Biological Process	regulation of system process	-4.38704	49	7	3479|3558|3717|3815|4313|4846|7042	IGF1|IL2|JAK2|KIT|MMP2|NOS3|TGFB2
Biological Process	positive regulation of T cell activation	-4.33487	49	5	207|3479|3558|3717|5588	AKT1|IGF1|IL2|JAK2|PRKCQ
Biological Process	regulation of interleukin-17 production	-4.20826	49	3	3558|3717|5588	IL2|JAK2|PRKCQ
Biological Process	regulation of blood circulation	-4.20371	49	5	3558|3717|4313|4846|7042	IL2|JAK2|MMP2|NOS3|TGFB2
Biological Process	positive regulation of leukocyte activation	-4.11311	49	6	207|695|3479|3558|3717|5588	AKT1|BTK|IGF1|IL2|JAK2|PRKCQ
Biological Process	positive regulation of lymphocyte proliferation	-4.07448	49	4	3479|3558|3717|5588	IGF1|IL2|JAK2|PRKCQ
Biological Process	positive regulation of mononuclear cell proliferation	-4.05096	49	4	3479|3558|3717|5588	IGF1|IL2|JAK2|PRKCQ
Biological Process	negative regulation of leukocyte cell-cell adhesion	-4.05096	49	4	207|383|836|3558	AKT1|ARG1|CASP3|IL2
Biological Process	positive regulation of cell activation	-4.02302	49	6	207|695|3479|3558|3717|5588	AKT1|BTK|IGF1|IL2|JAK2|PRKCQ
Biological Process	positive regulation of inflammatory response	-3.9602	49	4	695|834|3558|3717	BTK|CASP1|IL2|JAK2
Biological Process	regulation of lymphocyte apoptotic process	-3.95686	49	3	695|3558|5588	BTK|IL2|PRKCQ
Biological Process	negative regulation of lymphocyte activation	-3.86394	49	4	383|695|836|3558	ARG1|BTK|CASP3|IL2
Biological Process	regulation of B cell proliferation	-3.80684	49	3	695|836|3558	BTK|CASP3|IL2
Biological Process	positive regulation of interferon-gamma production	-3.56881	49	3	3265|3558|3717	HRAS|IL2|JAK2
Biological Process	negative regulation of leukocyte activation	-3.56281	49	4	383|695|836|3558	ARG1|BTK|CASP3|IL2
Biological Process	leukocyte differentiation	-3.54822	49	5	695|1021|3558|3815|4318	BTK|CDK6|IL2|KIT|MMP9
Biological Process	regulation of leukocyte apoptotic process	-3.44236	49	3	695|3558|5588	BTK|IL2|PRKCQ
Biological Process	regulation of heart contraction	-3.42382	49	4	3558|3717|4846|7042	IL2|JAK2|NOS3|TGFB2
Biological Process	extrinsic apoptotic signaling pathway	-3.36949	49	3	3558|3717|7042	IL2|JAK2|TGFB2
Biological Process	regulation of alpha-beta T cell activation	-3.15013	49	3	3558|3717|5588	IL2|JAK2|PRKCQ
Biological Process	lymphocyte differentiation	-3.09489	49	4	695|1021|3558|3815	BTK|CDK6|IL2|KIT
Biological Process	negative regulation of immune effector process	-3.09254	49	3	383|3558|7042	ARG1|IL2|TGFB2
Biological Process	regulation of interferon-gamma production	-3.0376	49	3	3265|3558|3717	HRAS|IL2|JAK2
Biological Process	positive regulation of production of molecular mediator of immune response	-3.00582	49	3	3558|3815|5950	IL2|KIT|RBP4
Biological Process	negative regulation of T cell activation	-2.95466	49	3	383|836|3558	ARG1|CASP3|IL2
Biological Process	mononuclear cell differentiation	-2.87357	49	4	695|1021|3558|3815	BTK|CDK6|IL2|KIT
Biological Process	leukocyte activation	-2.79711	49	5	695|1021|3558|3717|3815	BTK|CDK6|IL2|JAK2|KIT
Biological Process	T cell differentiation	-2.70319	49	3	1021|3558|3815	CDK6|IL2|KIT
Biological Process	regulation of lymphocyte mediated immunity	-2.5379	49	3	383|695|3558	ARG1|BTK|IL2
Biological Process	leukocyte activation involved in immune response	-2.50344	49	3	695|3558|3815	BTK|IL2|KIT
Biological Process	cell activation involved in immune response	-2.47662	49	3	695|3558|3815	BTK|IL2|KIT
Biological Process	adaptive immune response	-2.46147	49	5	383|695|3265|3558|3717	ARG1|BTK|HRAS|IL2|JAK2
Biological Process	positive regulation of cytosolic calcium ion concentration	-2.4248	49	3	2099|3558|3717	ESR1|IL2|JAK2
Biological Process	regulation of hemopoiesis	-2.39621	49	4	695|1021|3558|6772	BTK|CDK6|IL2|STAT1
Biological Process	regulation of B cell activation	-2.37527	49	3	695|836|3558	BTK|CASP3|IL2
Biological Process	lymphocyte activation	-2.33236	49	4	695|1021|3558|3815	BTK|CDK6|IL2|KIT
Biological Process	T cell activation	-2.0389	49	3	1021|3558|3815	CDK6|IL2|KIT
Biological Process	response to UV-A	-10.7435	49	5	207|1956|4313|4314|4318	AKT1|EGFR|MMP2|MMP3|MMP9
Biological Process	response to radiation	-10.0601	49	11	207|836|1956|1991|3265|3815|4313|4314|4318|5602|6648	AKT1|CASP3|EGFR|ELANE|HRAS|KIT|MMP2|MMP3|MMP9|MAPK10|SOD2
Biological Process	response to light stimulus	-8.81622	49	9	207|836|1956|1991|3815|4313|4314|4318|5602	AKT1|CASP3|EGFR|ELANE|KIT|MMP2|MMP3|MMP9|MAPK10
Biological Process	response to UV	-8.3709	49	7	207|836|1956|1991|4313|4314|4318	AKT1|CASP3|EGFR|ELANE|MMP2|MMP3|MMP9
Biological Process	extracellular matrix disassembly	-7.92492	49	5	1991|4313|4314|4318|5340	ELANE|MMP2|MMP3|MMP9|PLG
Biological Process	response to amyloid-beta	-7.5252	49	5	3479|3480|4313|4314|4318	IGF1|IGF1R|MMP2|MMP3|MMP9
Biological Process	extracellular matrix organization	-6.56851	49	7	1991|4313|4314|4318|5340|7042|7046	ELANE|MMP2|MMP3|MMP9|PLG|TGFB2|TGFBR1
Biological Process	extracellular structure organization	-6.55772	49	7	1991|4313|4314|4318|5340|7042|7046	ELANE|MMP2|MMP3|MMP9|PLG|TGFB2|TGFBR1
Biological Process	external encapsulating structure organization	-6.53626	49	7	1991|4313|4314|4318|5340|7042|7046	ELANE|MMP2|MMP3|MMP9|PLG|TGFB2|TGFBR1
Biological Process	cellular response to UV-A	-6.18284	49	3	4313|4314|4318	MMP2|MMP3|MMP9
Biological Process	cellular response to abiotic stimulus	-6.12969	49	7	834|836|3265|3480|4313|4314|4318	CASP1|CASP3|HRAS|IGF1R|MMP2|MMP3|MMP9
Biological Process	cellular response to environmental stimulus	-6.12969	49	7	834|836|3265|3480|4313|4314|4318	CASP1|CASP3|HRAS|IGF1R|MMP2|MMP3|MMP9
Biological Process	collagen metabolic process	-5.61385	49	4	383|4313|4314|4318	ARG1|MMP2|MMP3|MMP9
Biological Process	collagen catabolic process	-4.48758	49	3	4313|4314|4318	MMP2|MMP3|MMP9
Biological Process	regulation of neuroinflammatory response	-4.38745	49	3	3479|4314|4318	IGF1|MMP3|MMP9
Biological Process	ephrin receptor signaling pathway	-4.12741	49	3	4313|4318|5747	MMP2|MMP9|PTK2
Biological Process	cellular component disassembly	-3.93111	49	5	1991|4313|4314|4318|5340	ELANE|MMP2|MMP3|MMP9|PLG
Biological Process	cellular response to radiation	-3.68747	49	4	3265|4313|4314|4318	HRAS|MMP2|MMP3|MMP9
Biological Process	cellular response to UV	-3.36949	49	3	4313|4314|4318	MMP2|MMP3|MMP9
Biological Process	cellular response to light stimulus	-3.05928	49	3	4313|4314|4318	MMP2|MMP3|MMP9
Biological Process	response to growth factor	-10.7253	49	12	207|383|836|1956|2908|3480|3643|3791|5594|5747|7042|7046	AKT1|ARG1|CASP3|EGFR|NR3C1|IGF1R|INSR|KDR|MAPK1|PTK2|TGFB2|TGFBR1
Biological Process	cellular response to growth factor stimulus	-9.72358	49	11	207|383|836|1956|2908|3480|3643|3791|5747|7042|7046	AKT1|ARG1|CASP3|EGFR|NR3C1|IGF1R|INSR|KDR|PTK2|TGFB2|TGFBR1
Biological Process	cellular response to transforming growth factor beta stimulus	-6.78078	49	6	383|2908|3480|5747|7042|7046	ARG1|NR3C1|IGF1R|PTK2|TGFB2|TGFBR1
Biological Process	response to transforming growth factor beta	-6.66446	49	6	383|2908|3480|5747|7042|7046	ARG1|NR3C1|IGF1R|PTK2|TGFB2|TGFBR1
Biological Process	trabecula morphogenesis	-6.10151	49	4	4313|5950|7042|7046	MMP2|RBP4|TGFB2|TGFBR1
Biological Process	urogenital system development	-5.96005	49	7	367|2099|4313|5950|6772|7042|7046	AR|ESR1|MMP2|RBP4|STAT1|TGFB2|TGFBR1
Biological Process	heart morphogenesis	-5.50212	49	6	3643|4846|5747|5950|7042|7046	INSR|NOS3|PTK2|RBP4|TGFB2|TGFBR1
Biological Process	negative regulation of epithelial cell proliferation	-5.15579	49	5	367|1021|6772|7042|7046	AR|CDK6|STAT1|TGFB2|TGFBR1
Biological Process	cardiac chamber development	-5.11753	49	5	3480|4846|5950|7042|7046	IGF1R|NOS3|RBP4|TGFB2|TGFBR1
Biological Process	skeletal system development	-4.78467	49	7	3479|3815|4313|4318|5950|7042|7046	IGF1|KIT|MMP2|MMP9|RBP4|TGFB2|TGFBR1
Biological Process	heart trabecula morphogenesis	-4.75752	49	3	5950|7042|7046	RBP4|TGFB2|TGFBR1
Biological Process	sensory organ development	-4.52259	49	7	1956|3791|3815|5594|5950|7042|7046	EGFR|KDR|KIT|MAPK1|RBP4|TGFB2|TGFBR1
Biological Process	mesenchyme development	-4.43946	49	5	4846|5594|6772|7042|7046	NOS3|MAPK1|STAT1|TGFB2|TGFBR1
Biological Process	embryonic morphogenesis	-4.42024	49	7	836|4313|4318|5594|5950|7042|7046	CASP3|MMP2|MMP9|MAPK1|RBP4|TGFB2|TGFBR1
Biological Process	ventricular septum morphogenesis	-4.35576	49	3	4846|7042|7046	NOS3|TGFB2|TGFBR1
Biological Process	cardiac chamber morphogenesis	-4.27626	49	4	4846|5950|7042|7046	NOS3|RBP4|TGFB2|TGFBR1
Biological Process	mesenchymal cell differentiation	-3.79294	49	4	5594|6772|7042|7046	MAPK1|STAT1|TGFB2|TGFBR1
Biological Process	camera-type eye development	-3.77334	49	5	1956|3791|5950|7042|7046	EGFR|KDR|RBP4|TGFB2|TGFBR1
Biological Process	cardiac septum morphogenesis	-3.67301	49	3	4846|7042|7046	NOS3|TGFB2|TGFBR1
Biological Process	ventricular septum development	-3.63729	49	3	4846|7042|7046	NOS3|TGFB2|TGFBR1
Biological Process	eye development	-3.49333	49	5	1956|3791|5950|7042|7046	EGFR|KDR|RBP4|TGFB2|TGFBR1
Biological Process	visual system development	-3.47183	49	5	1956|3791|5950|7042|7046	EGFR|KDR|RBP4|TGFB2|TGFBR1
Biological Process	sensory system development	-3.44005	49	5	1956|3791|5950|7042|7046	EGFR|KDR|RBP4|TGFB2|TGFBR1
Biological Process	transforming growth factor beta receptor signaling pathway	-3.31419	49	3	5747|7042|7046	PTK2|TGFB2|TGFBR1
Biological Process	cardiac septum development	-3.16199	49	3	4846|7042|7046	NOS3|TGFB2|TGFBR1
Biological Process	cardiac ventricle development	-2.94468	49	3	4846|7042|7046	NOS3|TGFB2|TGFBR1
Biological Process	renal system development	-2.86818	49	4	5950|6772|7042|7046	RBP4|STAT1|TGFB2|TGFBR1
Biological Process	cardiac muscle tissue development	-2.54491	49	3	5950|7042|7046	RBP4|TGFB2|TGFBR1
Biological Process	striated muscle tissue development	-2.51025	49	3	5950|7042|7046	RBP4|TGFB2|TGFBR1
Biological Process	transmembrane receptor protein serine/threonine kinase signaling pathway	-2.44395	49	3	5747|7042|7046	PTK2|TGFB2|TGFBR1
Biological Process	regulation of epithelial cell proliferation	-10.6618	49	11	207|367|383|1021|1956|3265|3479|3791|6772|7042|7046	AKT1|AR|ARG1|CDK6|EGFR|HRAS|IGF1|KDR|STAT1|TGFB2|TGFBR1
Biological Process	negative regulation of apoptotic signaling pathway	-9.93462	49	9	207|367|3479|4318|4846|5478|5770|6648|7046	AKT1|AR|IGF1|MMP9|NOS3|PPIA|PTPN1|SOD2|TGFBR1
Biological Process	regulation of apoptotic signaling pathway	-9.44004	49	10	207|367|3479|3717|4318|4846|5478|5770|6648|7046	AKT1|AR|IGF1|JAK2|MMP9|NOS3|PPIA|PTPN1|SOD2|TGFBR1
Biological Process	positive regulation of epithelial cell proliferation	-8.77224	49	8	207|367|383|1956|3265|3479|3791|7046	AKT1|AR|ARG1|EGFR|HRAS|IGF1|KDR|TGFBR1
Biological Process	blood vessel development	-8.14431	49	10	207|3791|4313|4846|5340|5594|5604|5747|7042|7046	AKT1|KDR|MMP2|NOS3|PLG|MAPK1|MAP2K1|PTK2|TGFB2|TGFBR1
Biological Process	vasculature development	-7.97662	49	10	207|3791|4313|4846|5340|5594|5604|5747|7042|7046	AKT1|KDR|MMP2|NOS3|PLG|MAPK1|MAP2K1|PTK2|TGFB2|TGFBR1
Biological Process	epithelial cell migration	-6.46643	49	5	207|3791|3815|4846|7046	AKT1|KDR|KIT|NOS3|TGFBR1
Biological Process	epithelium migration	-6.39438	49	5	207|3791|3815|4846|7046	AKT1|KDR|KIT|NOS3|TGFBR1
Biological Process	negative regulation of extrinsic apoptotic signaling pathway	-6.27958	49	5	207|367|3479|4846|7046	AKT1|AR|IGF1|NOS3|TGFBR1
Biological Process	tissue migration	-6.25737	49	5	207|3791|3815|4846|7046	AKT1|KDR|KIT|NOS3|TGFBR1
Biological Process	nitric oxide biosynthetic process	-5.65462	49	3	207|4843|4846	AKT1|NOS2|NOS3
Biological Process	endothelial cell migration	-5.36165	49	4	207|3791|4846|7046	AKT1|KDR|NOS3|TGFBR1
Biological Process	nitric oxide metabolic process	-5.34789	49	3	207|4843|4846	AKT1|NOS2|NOS3
Biological Process	regulation of extrinsic apoptotic signaling pathway	-5.3027	49	5	207|367|3479|4846|7046	AKT1|AR|IGF1|NOS3|TGFBR1
Biological Process	blood vessel morphogenesis	-5.29676	49	7	207|3791|4313|4846|5747|7042|7046	AKT1|KDR|MMP2|NOS3|PTK2|TGFB2|TGFBR1
Biological Process	reactive nitrogen species metabolic process	-5.28144	49	3	207|4843|4846	AKT1|NOS2|NOS3
Biological Process	regulation of epithelial cell migration	-5.13296	49	6	207|3791|4318|4846|5747|7042	AKT1|KDR|MMP9|NOS3|PTK2|TGFB2
Biological Process	positive regulation of epithelial cell migration	-5.03099	49	5	207|3791|4318|4846|7042	AKT1|KDR|MMP9|NOS3|TGFB2
Biological Process	regulation of endothelial cell proliferation	-4.98317	49	5	207|383|3791|6772|7046	AKT1|ARG1|KDR|STAT1|TGFBR1
Biological Process	ameboidal-type cell migration	-4.90216	49	5	207|3791|3815|4846|7046	AKT1|KDR|KIT|NOS3|TGFBR1
Biological Process	angiogenesis	-4.86733	49	6	207|3791|4313|4846|5747|7046	AKT1|KDR|MMP2|NOS3|PTK2|TGFBR1
Biological Process	regulation of developmental growth	-4.82219	49	6	207|367|3479|3643|5950|7046	AKT1|AR|IGF1|INSR|RBP4|TGFBR1
Biological Process	response to fluid shear stress	-4.63474	49	3	207|4313|4846	AKT1|MMP2|NOS3
Biological Process	lipopolysaccharide-mediated signaling pathway	-4.5228	49	3	207|4846|5594	AKT1|NOS3|MAPK1
Biological Process	positive regulation of endothelial cell proliferation	-4.49155	49	4	207|383|3791|7046	AKT1|ARG1|KDR|TGFBR1
Biological Process	regulation of mitochondrial membrane potential	-3.67301	49	3	207|3791|6648	AKT1|KDR|SOD2
Biological Process	positive regulation of blood vessel endothelial cell migration	-3.60258	49	3	207|3791|4846	AKT1|KDR|NOS3
Biological Process	regulation of endothelial cell migration	-3.275	49	4	207|3791|4846|5747	AKT1|KDR|NOS3|PTK2
Biological Process	gamete generation	-2.92005	49	6	207|367|3815|4313|4846|7046	AKT1|AR|KIT|MMP2|NOS3|TGFBR1
Biological Process	positive regulation of endothelial cell migration	-2.89605	49	3	207|3791|4846	AKT1|KDR|NOS3
Biological Process	regulation of blood vessel endothelial cell migration	-2.72768	49	3	207|3791|4846	AKT1|KDR|NOS3
Biological Process	regulation of macroautophagy	-2.66348	49	3	207|836|3791	AKT1|CASP3|KDR
Biological Process	regulation of angiogenesis	-2.61694	49	4	3791|4846|6772|7042	KDR|NOS3|STAT1|TGFB2
Biological Process	regulation of vasculature development	-2.59011	49	4	3791|4846|6772|7042	KDR|NOS3|STAT1|TGFB2
Biological Process	regulation of defense response	-10.5145	49	13	383|695|834|1991|2099|3320|3479|3558|3717|4314|4318|5770|6772	ARG1|BTK|CASP1|ELANE|ESR1|HSP90AA1|IGF1|IL2|JAK2|MMP3|MMP9|PTPN1|STAT1
Biological Process	regulation of inflammatory response	-7.83073	49	9	695|834|1991|2099|3479|3558|3717|4314|4318	BTK|CASP1|ELANE|ESR1|IGF1|IL2|JAK2|MMP3|MMP9
Biological Process	negative regulation of response to external stimulus	-5.24999	49	7	383|1991|2147|3479|3558|4846|5340	ARG1|ELANE|F2|IGF1|IL2|NOS3|PLG
Biological Process	negative regulation of cytokine production	-4.55547	49	6	383|695|1991|2147|3479|7042	ARG1|BTK|ELANE|F2|IGF1|TGFB2
Biological Process	negative regulation of defense response	-3.02133	49	4	383|1991|3479|3558	ARG1|ELANE|IGF1|IL2
Biological Process	negative regulation of inflammatory response	-2.48326	49	3	1991|3479|3558	ELANE|IGF1|IL2
Biological Process	embryonic organ development	-8.668	49	10	207|1956|3791|3815|5340|5594|5604|5950|7042|7046	AKT1|EGFR|KDR|KIT|PLG|MAPK1|MAP2K1|RBP4|TGFB2|TGFBR1
Biological Process	chordate embryonic development	-8.3582	49	11	207|367|836|1956|4846|5340|5594|5604|5950|7042|7046	AKT1|AR|CASP3|EGFR|NOS3|PLG|MAPK1|MAP2K1|RBP4|TGFB2|TGFBR1
Biological Process	embryo development ending in birth or egg hatching	-8.21149	49	11	207|367|836|1956|4846|5340|5594|5604|5950|7042|7046	AKT1|AR|CASP3|EGFR|NOS3|PLG|MAPK1|MAP2K1|RBP4|TGFB2|TGFBR1
Biological Process	placenta development	-6.86739	49	6	207|1956|5340|5594|5604|5747	AKT1|EGFR|PLG|MAPK1|MAP2K1|PTK2
Biological Process	in utero embryonic development	-6.75752	49	8	207|367|1956|4846|5340|5594|5604|7046	AKT1|AR|EGFR|NOS3|PLG|MAPK1|MAP2K1|TGFBR1
Biological Process	placenta blood vessel development	-6.72969	49	4	207|5340|5594|5604	AKT1|PLG|MAPK1|MAP2K1
Biological Process	embryonic placenta development	-6.54107	49	5	207|1956|5340|5594|5604	AKT1|EGFR|PLG|MAPK1|MAP2K1
Biological Process	labyrinthine layer development	-5.98449	49	4	207|5340|5594|5604	AKT1|PLG|MAPK1|MAP2K1
Biological Process	endocrine system development	-5.75054	49	5	1021|3643|5594|5604|7046	CDK6|INSR|MAPK1|MAP2K1|TGFBR1
Biological Process	labyrinthine layer blood vessel development	-5.34789	49	3	207|5340|5594	AKT1|PLG|MAPK1
Biological Process	gliogenesis	-4.60775	49	5	207|1021|5594|5604|7042	AKT1|CDK6|MAPK1|MAP2K1|TGFB2
Biological Process	animal organ formation	-4.55903	49	3	367|5594|5604	AR|MAPK1|MAP2K1
Biological Process	thymus development	-4.26521	49	3	5594|5604|7046	MAPK1|MAP2K1|TGFBR1
Biological Process	face development	-4.18073	49	3	4313|5594|5604	MMP2|MAPK1|MAP2K1
Biological Process	astrocyte differentiation	-4.07626	49	3	1021|5594|5604	CDK6|MAPK1|MAP2K1
Biological Process	glial cell differentiation	-3.80289	49	4	207|1021|5594|5604	AKT1|CDK6|MAPK1|MAP2K1
Biological Process	synaptic signaling	-2.23682	49	4	207|3717|5340|5594	AKT1|JAK2|PLG|MAPK1
Biological Process	positive regulation of cytokine production	-8.34536	49	10	834|1991|3265|3320|3558|3717|3815|4843|5588|6772	CASP1|ELANE|HRAS|HSP90AA1|IL2|JAK2|KIT|NOS2|PRKCQ|STAT1
Biological Process	cellular response to interferon-gamma	-4.60271	49	4	834|3717|4843|6772	CASP1|JAK2|NOS2|STAT1
Biological Process	response to interferon-gamma	-4.27626	49	4	834|3717|4843|6772	CASP1|JAK2|NOS2|STAT1
Biological Process	response to virus	-3.54822	49	5	834|1021|3320|3717|6772	CASP1|CDK6|HSP90AA1|JAK2|STAT1
Biological Process	regulation of I-kappaB kinase/NF-kappaB signaling	-2.08431	49	3	834|2099|6772	CASP1|ESR1|STAT1
Biological Process	positive regulation of nitric oxide biosynthetic process	-8.13001	49	5	207|3320|3643|3717|6648	AKT1|HSP90AA1|INSR|JAK2|SOD2
Biological Process	positive regulation of nitric oxide metabolic process	-8.02499	49	5	207|3320|3643|3717|6648	AKT1|HSP90AA1|INSR|JAK2|SOD2
Biological Process	regulation of nitric oxide biosynthetic process	-7.25935	49	5	207|3320|3643|3717|6648	AKT1|HSP90AA1|INSR|JAK2|SOD2
Biological Process	regulation of nitric oxide metabolic process	-7.15493	49	5	207|3320|3643|3717|6648	AKT1|HSP90AA1|INSR|JAK2|SOD2
Biological Process	positive regulation of small molecule metabolic process	-6.81506	49	6	207|1066|3479|3643|4843|4846	AKT1|CES1|IGF1|INSR|NOS2|NOS3
Biological Process	positive regulation of nucleotide metabolic process	-5.98449	49	4	3479|3643|4843|4846	IGF1|INSR|NOS2|NOS3
Biological Process	positive regulation of purine nucleotide metabolic process	-5.98449	49	4	3479|3643|4843|4846	IGF1|INSR|NOS2|NOS3
Biological Process	regulation of small molecule metabolic process	-5.86649	49	7	207|1066|3479|3643|3815|4843|4846	AKT1|CES1|IGF1|INSR|KIT|NOS2|NOS3
Biological Process	insulin-like growth factor receptor signaling pathway	-5.84071	49	3	207|3479|3480	AKT1|IGF1|IGF1R
Biological Process	positive regulation of glycogen biosynthetic process	-5.7443	49	3	207|3479|3643	AKT1|IGF1|INSR
Biological Process	positive regulation of glycogen metabolic process	-5.65462	49	3	207|3479|3643	AKT1|IGF1|INSR
Biological Process	positive regulation of cellular catabolic process	-5.10824	49	7	207|3320|3479|3643|3791|5747|5770	AKT1|HSP90AA1|IGF1|INSR|KDR|PTK2|PTPN1
Biological Process	response to temperature stimulus	-5.09242	49	5	207|3320|3479|4846|6648	AKT1|HSP90AA1|IGF1|NOS3|SOD2
Biological Process	regulation of purine nucleotide metabolic process	-4.86985	49	4	3479|3643|4843|4846	IGF1|INSR|NOS2|NOS3
Biological Process	regulation of nucleotide metabolic process	-4.83162	49	4	3479|3643|4843|4846	IGF1|INSR|NOS2|NOS3
Biological Process	regulation of glycogen biosynthetic process	-4.75752	49	3	207|3479|3643	AKT1|IGF1|INSR
Biological Process	regulation of glucan biosynthetic process	-4.75752	49	3	207|3479|3643	AKT1|IGF1|INSR
Biological Process	positive regulation of catabolic process	-4.73543	49	7	207|3320|3479|3643|3791|5747|5770	AKT1|HSP90AA1|IGF1|INSR|KDR|PTK2|PTPN1
Biological Process	response to heat	-4.7044	49	4	207|3320|3479|4846	AKT1|HSP90AA1|IGF1|NOS3
Biological Process	positive regulation of cell cycle	-4.61584	49	6	207|1956|3479|3480|3643|7042	AKT1|EGFR|IGF1|IGF1R|INSR|TGFB2
Biological Process	positive regulation of glucose import	-4.5228	49	3	207|3479|3643	AKT1|IGF1|INSR
Biological Process	regulation of glycogen metabolic process	-4.5228	49	3	207|3479|3643	AKT1|IGF1|INSR
Biological Process	phosphatidylinositol 3-kinase signaling	-4.48758	49	3	207|3479|3480	AKT1|IGF1|IGF1R
Biological Process	protein kinase B signaling	-4.48758	49	3	207|3479|3791	AKT1|IGF1|KDR
Biological Process	regulation of polysaccharide biosynthetic process	-4.45332	49	3	207|3479|3643	AKT1|IGF1|INSR
Biological Process	positive regulation of glucose metabolic process	-4.35576	49	3	207|3479|3643	AKT1|IGF1|INSR
Biological Process	positive regulation of glucose transmembrane transport	-4.29467	49	3	207|3479|3643	AKT1|IGF1|INSR
Biological Process	regulation of polysaccharide metabolic process	-4.26521	49	3	207|3479|3643	AKT1|IGF1|INSR
Biological Process	regulation of release of cytochrome c from mitochondria	-4.20826	49	3	207|3479|4318	AKT1|IGF1|MMP9
Biological Process	positive regulation of cell cycle process	-4.20371	49	5	207|1956|3479|3480|3643	AKT1|EGFR|IGF1|IGF1R|INSR
Biological Process	regulation of generation of precursor metabolites and energy	-4.1472	49	4	207|3479|3643|4843	AKT1|IGF1|INSR|NOS2
Biological Process	ossification	-4.0959	49	5	207|1956|3479|4313|4318	AKT1|EGFR|IGF1|MMP2|MMP9
Biological Process	regulation of mitochondrion organization	-3.98241	49	4	207|3479|3791|4318	AKT1|IGF1|KDR|MMP9
Biological Process	positive regulation of cellular carbohydrate metabolic process	-3.97984	49	3	207|3479|3643	AKT1|IGF1|INSR
Biological Process	regulation of glucose import	-3.89034	49	3	207|3479|3643	AKT1|IGF1|INSR
Biological Process	phosphatidylinositol-mediated signaling	-3.61981	49	3	207|3479|3480	AKT1|IGF1|IGF1R
Biological Process	regulation of glucose transmembrane transport	-3.55228	49	3	207|3479|3643	AKT1|IGF1|INSR
Biological Process	inositol lipid-mediated signaling	-3.55228	49	3	207|3479|3480	AKT1|IGF1|IGF1R
Biological Process	positive regulation of carbohydrate metabolic process	-3.53596	49	3	207|3479|3643	AKT1|IGF1|INSR
Biological Process	positive regulation of transmembrane transport	-3.28925	49	4	207|2147|3479|3643	AKT1|F2|IGF1|INSR
Biological Process	regulation of carbohydrate biosynthetic process	-3.21062	49	3	207|3479|3643	AKT1|IGF1|INSR
Biological Process	regulation of glucose metabolic process	-2.97486	49	3	207|3479|3643	AKT1|IGF1|INSR
Biological Process	regulation of cell cycle process	-2.93515	49	6	207|1017|1956|3479|3480|3643	AKT1|CDK2|EGFR|IGF1|IGF1R|INSR
Biological Process	regulation of mitotic cell cycle	-2.83001	49	5	207|1017|1956|3479|3643	AKT1|CDK2|EGFR|IGF1|INSR
Biological Process	regulation of cellular carbohydrate metabolic process	-2.70319	49	3	207|3479|3643	AKT1|IGF1|INSR
Biological Process	positive regulation of developmental growth	-2.58066	49	3	207|3479|3643	AKT1|IGF1|INSR
Biological Process	regulation of carbohydrate metabolic process	-2.47001	49	3	207|3479|3643	AKT1|IGF1|INSR
Biological Process	striated muscle cell differentiation	-2.39359	49	3	207|836|3479	AKT1|CASP3|IGF1
Biological Process	mitochondrion organization	-2.2855	49	4	207|3320|4846|6648	AKT1|HSP90AA1|NOS3|SOD2
Biological Process	muscle cell differentiation	-2.05683	49	3	207|836|3479	AKT1|CASP3|IGF1
Biological Process	positive regulation of DNA-binding transcription factor activity	-7.98069	49	8	207|367|695|2099|3717|3815|5478|5588	AKT1|AR|BTK|ESR1|JAK2|KIT|PPIA|PRKCQ
Biological Process	regulation of DNA-binding transcription factor activity	-7.37561	49	9	207|367|695|2099|3717|3815|5478|5588|5602	AKT1|AR|BTK|ESR1|JAK2|KIT|PPIA|PRKCQ|MAPK10
Biological Process	inflammatory response	-6.83769	49	9	207|695|1991|2147|3717|3815|4843|5265|5588	AKT1|BTK|ELANE|F2|JAK2|KIT|NOS2|SERPINA1|PRKCQ
Biological Process	positive regulation of NF-kappaB transcription factor activity	-3.9383	49	4	367|695|5478|5588	AR|BTK|PPIA|PRKCQ
Biological Process	arginine metabolic process	-7.95968	49	4	383|4843|4846|5009	ARG1|NOS2|NOS3|OTC
Biological Process	arginine catabolic process	-6.47506	49	3	383|4843|4846	ARG1|NOS2|NOS3
Biological Process	glutamine family amino acid metabolic process	-5.28538	49	4	383|4843|4846|5009	ARG1|NOS2|NOS3|OTC
Biological Process	glutamine family amino acid catabolic process	-5.04555	49	3	383|4843|4846	ARG1|NOS2|NOS3
Biological Process	circulatory system process	-4.82926	49	7	367|3643|4313|4843|4846|6648|6772	AR|INSR|MMP2|NOS2|NOS3|SOD2|STAT1
Biological Process	alpha-amino acid catabolic process	-4.81283	49	4	383|4843|4846|5009	ARG1|NOS2|NOS3|OTC
Biological Process	cellular amino acid catabolic process	-4.50697	49	4	383|4843|4846|5009	ARG1|NOS2|NOS3|OTC
Biological Process	response to toxic substance	-4.45745	49	5	213|383|1066|4846|6648	ALB|ARG1|CES1|NOS3|SOD2
Biological Process	superoxide metabolic process	-4.41995	49	3	4843|4846|6648	NOS2|NOS3|SOD2
Biological Process	blood circulation	-4.31129	49	6	367|4313|4843|4846|6648|6772	AR|MMP2|NOS2|NOS3|SOD2|STAT1
Biological Process	negative regulation of blood pressure	-4.15379	49	3	4843|4846|6648	NOS2|NOS3|SOD2
Biological Process	regulation of blood pressure	-3.58869	49	4	367|4843|4846|6648	AR|NOS2|NOS3|SOD2
Biological Process	alpha-amino acid metabolic process	-3.54579	49	4	383|4843|4846|5009	ARG1|NOS2|NOS3|OTC
Biological Process	second-messenger-mediated signaling	-3.37006	49	4	695|3791|4843|4846	BTK|KDR|NOS2|NOS3
Biological Process	cellular oxidant detoxification	-3.36949	49	3	213|4846|6648	ALB|NOS3|SOD2
Biological Process	carboxylic acid catabolic process	-3.34759	49	4	383|4843|4846|5009	ARG1|NOS2|NOS3|OTC
Biological Process	organic acid catabolic process	-3.31814	49	4	383|4843|4846|5009	ARG1|NOS2|NOS3|OTC
Biological Process	regulation of systemic arterial blood pressure	-3.30075	49	3	367|4846|6648	AR|NOS3|SOD2
Biological Process	reactive oxygen species metabolic process	-3.26129	49	3	4843|4846|6648	NOS2|NOS3|SOD2
Biological Process	cellular detoxification	-3.17396	49	3	213|4846|6648	ALB|NOS3|SOD2
Biological Process	cellular response to toxic substance	-3.08135	49	3	213|4846|6648	ALB|NOS3|SOD2
Biological Process	vascular process in circulatory system	-3.05765	49	4	3643|4313|4846|6648	INSR|MMP2|NOS3|SOD2
Biological Process	cellular amino acid metabolic process	-2.96848	49	4	383|4843|4846|5009	ARG1|NOS2|NOS3|OTC
Biological Process	detoxification	-2.88656	49	3	213|4846|6648	ALB|NOS3|SOD2
Biological Process	regulation of tube diameter	-2.80442	49	3	4313|4846|6648	MMP2|NOS3|SOD2
Biological Process	blood vessel diameter maintenance	-2.80442	49	3	4313|4846|6648	MMP2|NOS3|SOD2
Biological Process	regulation of tube size	-2.79564	49	3	4313|4846|6648	MMP2|NOS3|SOD2
Biological Process	small molecule catabolic process	-2.59454	49	4	383|4843|4846|5009	ARG1|NOS2|NOS3|OTC
Biological Process	regulation of response to wounding	-7.95304	49	7	2147|3265|3480|4846|5340|5604|5747	F2|HRAS|IGF1R|NOS3|PLG|MAP2K1|PTK2
Biological Process	biological process involved in symbiotic interaction	-6.86498	49	7	1956|1991|2147|3643|3717|5340|5478	EGFR|ELANE|F2|INSR|JAK2|PLG|PPIA
Biological Process	positive regulation of response to wounding	-6.78249	49	5	2147|3265|3480|5340|5747	F2|HRAS|IGF1R|PLG|PTK2
Biological Process	regulation of wound healing	-5.5375	49	5	2147|3265|4846|5340|5747	F2|HRAS|NOS3|PLG|PTK2
Biological Process	positive regulation of wound healing	-5.46908	49	4	2147|3265|5340|5747	F2|HRAS|PLG|PTK2
Biological Process	biological process involved in interaction with symbiont	-4.6698	49	4	1991|2147|3717|5340	ELANE|F2|JAK2|PLG
Biological Process	negative regulation of blood coagulation	-4.26521	49	3	2147|4846|5340	F2|NOS3|PLG
Biological Process	negative regulation of hemostasis	-4.23641	49	3	2147|4846|5340	F2|NOS3|PLG
Biological Process	negative regulation of coagulation	-4.15379	49	3	2147|4846|5340	F2|NOS3|PLG
Biological Process	blood coagulation	-3.75376	49	4	2147|5265|5340|5478	F2|SERPINA1|PLG|PPIA
Biological Process	coagulation	-3.73453	49	4	2147|5265|5340|5478	F2|SERPINA1|PLG|PPIA
Biological Process	regulation of blood coagulation	-3.70979	49	3	2147|4846|5340	F2|NOS3|PLG
Biological Process	hemostasis	-3.70613	49	4	2147|5265|5340|5478	F2|SERPINA1|PLG|PPIA
Biological Process	regulation of hemostasis	-3.67301	49	3	2147|4846|5340	F2|NOS3|PLG
Biological Process	negative regulation of wound healing	-3.63729	49	3	2147|4846|5340	F2|NOS3|PLG
Biological Process	regulation of coagulation	-3.61981	49	3	2147|4846|5340	F2|NOS3|PLG
Biological Process	regulation of body fluid levels	-3.47718	49	5	2147|4846|5265|5340|5478	F2|NOS3|SERPINA1|PLG|PPIA
Biological Process	negative regulation of response to wounding	-3.38372	49	3	2147|4846|5340	F2|NOS3|PLG
Biological Process	apoptotic signaling pathway	-7.91752	49	8	695|834|836|3265|3558|3717|6648|7042	BTK|CASP1|CASP3|HRAS|IL2|JAK2|SOD2|TGFB2
Biological Process	response to xenobiotic stimulus	-7.8214	49	9	383|590|836|4313|4843|5009|6648|6772|7042	ARG1|BCHE|CASP3|MMP2|NOS2|OTC|SOD2|STAT1|TGFB2
Biological Process	positive regulation of cell death	-6.30722	49	9	836|3717|4313|4314|4318|4843|6648|7042|7046	CASP3|JAK2|MMP2|MMP3|MMP9|NOS2|SOD2|TGFB2|TGFBR1
Biological Process	positive regulation of programmed cell death	-5.61107	49	8	836|3717|4313|4318|4843|6648|7042|7046	CASP3|JAK2|MMP2|MMP9|NOS2|SOD2|TGFB2|TGFBR1
Biological Process	response to decreased oxygen levels	-5.13296	49	6	207|836|4313|4843|6648|7042	AKT1|CASP3|MMP2|NOS2|SOD2|TGFB2
Biological Process	regulation of neuron death	-4.93678	49	6	207|836|3265|3717|6648|7042	AKT1|CASP3|HRAS|JAK2|SOD2|TGFB2
Biological Process	response to oxygen levels	-4.92116	49	6	207|836|4313|4843|6648|7042	AKT1|CASP3|MMP2|NOS2|SOD2|TGFB2
Biological Process	regulation of neuron apoptotic process	-4.66723	49	5	836|3265|3717|6648|7042	CASP3|HRAS|JAK2|SOD2|TGFB2
Biological Process	positive regulation of apoptotic process	-4.65545	49	7	836|3717|4313|4318|6648|7042|7046	CASP3|JAK2|MMP2|MMP9|SOD2|TGFB2|TGFBR1
Biological Process	response to hypoxia	-4.06619	49	5	836|4313|4843|6648|7042	CASP3|MMP2|NOS2|SOD2|TGFB2
Biological Process	intrinsic apoptotic signaling pathway	-3.99363	49	4	836|3265|3717|6648	CASP3|HRAS|JAK2|SOD2
Biological Process	negative regulation of neuron death	-3.43166	49	4	207|3265|3717|6648	AKT1|HRAS|JAK2|SOD2
Biological Process	response to ionizing radiation	-2.80442	49	3	836|3265|6648	CASP3|HRAS|SOD2
Biological Process	negative regulation of neuron apoptotic process	-2.76969	49	3	3265|3717|6648	HRAS|JAK2|SOD2
Biological Process	gland morphogenesis	-7.79841	49	6	367|383|1956|2099|4313|7042	AR|ARG1|EGFR|ESR1|MMP2|TGFB2
Biological Process	mammary gland epithelium development	-7.44577	49	5	207|367|2099|3717|5594	AKT1|AR|ESR1|JAK2|MAPK1
Biological Process	mammary gland development	-7.31045	49	6	207|367|383|2099|3717|5594	AKT1|AR|ARG1|ESR1|JAK2|MAPK1
Biological Process	male gonad development	-7.05033	49	6	367|2099|3643|3815|7042|7046	AR|ESR1|INSR|KIT|TGFB2|TGFBR1
Biological Process	development of primary male sexual characteristics	-7.03141	49	6	367|2099|3643|3815|7042|7046	AR|ESR1|INSR|KIT|TGFB2|TGFBR1
Biological Process	male sex differentiation	-6.63221	49	6	367|2099|3643|3815|7042|7046	AR|ESR1|INSR|KIT|TGFB2|TGFBR1
Biological Process	female pregnancy	-6.4771	49	6	207|367|383|2099|4313|4318	AKT1|AR|ARG1|ESR1|MMP2|MMP9
Biological Process	multi-organism reproductive process	-6.19377	49	6	207|367|383|2099|4313|4318	AKT1|AR|ARG1|ESR1|MMP2|MMP9
Biological Process	multi-multicellular organism process	-6.07637	49	6	207|367|383|2099|4313|4318	AKT1|AR|ARG1|ESR1|MMP2|MMP9
Biological Process	maternal process involved in female pregnancy	-5.61385	49	4	207|367|383|2099	AKT1|AR|ARG1|ESR1
Biological Process	epithelial cell differentiation	-5.42224	49	8	207|367|836|1021|1066|2099|3791|5604	AKT1|AR|CASP3|CDK6|CES1|ESR1|KDR|MAP2K1
Biological Process	prostate gland epithelium morphogenesis	-5.15806	49	3	367|2099|4313	AR|ESR1|MMP2
Biological Process	morphogenesis of an epithelium	-5.12712	49	7	367|836|1956|2099|3791|4313|7042	AR|CASP3|EGFR|ESR1|KDR|MMP2|TGFB2
Biological Process	prostate gland morphogenesis	-5.04555	49	3	367|2099|4313	AR|ESR1|MMP2
Biological Process	growth	-4.51611	49	6	367|2099|3320|3479|5340|7042	AR|ESR1|HSP90AA1|IGF1|PLG|TGFB2
Biological Process	developmental growth	-4.51611	49	6	367|2099|3320|3479|5340|7042	AR|ESR1|HSP90AA1|IGF1|PLG|TGFB2
Biological Process	mammary gland morphogenesis	-4.35576	49	3	367|383|2099	AR|ARG1|ESR1
Biological Process	prostate gland development	-4.32485	49	3	367|2099|4313	AR|ESR1|MMP2
Biological Process	genitalia development	-4.23641	49	3	367|2099|5950	AR|ESR1|RBP4
Biological Process	epithelial tube morphogenesis	-3.85714	49	5	367|836|2099|3791|7042	AR|CASP3|ESR1|KDR|TGFB2
Biological Process	response to estrogen	-3.70979	49	3	367|2099|4313	AR|ESR1|MMP2
Biological Process	regulation of reproductive process	-3.58002	49	4	367|2099|3479|3643	AR|ESR1|IGF1|INSR
Biological Process	organ growth	-3.45747	49	3	367|2099|7042	AR|ESR1|TGFB2
Biological Process	branching morphogenesis of an epithelial tube	-2.87714	49	3	367|2099|3791	AR|ESR1|KDR
Biological Process	morphogenesis of a branching epithelium	-2.63267	49	3	367|2099|3791	AR|ESR1|KDR
Biological Process	morphogenesis of a branching structure	-2.56623	49	3	367|2099|3791	AR|ESR1|KDR
Biological Process	epithelial cell development	-2.51025	49	3	367|1021|2099	AR|CDK6|ESR1
Biological Process	MAPK cascade	-7.78152	49	7	1956|3265|3479|3791|5594|5602|5604	EGFR|HRAS|IGF1|KDR|MAPK1|MAPK10|MAP2K1
Biological Process	positive regulation of organelle organization	-6.98084	49	9	1017|3265|3479|3643|3791|4318|5588|5594|7046	CDK2|HRAS|IGF1|INSR|KDR|MMP9|PRKCQ|MAPK1|TGFBR1
Biological Process	ERK1 and ERK2 cascade	-6.363	49	4	3479|3791|5594|5604	IGF1|KDR|MAPK1|MAP2K1
Biological Process	regulation of ERK1 and ERK2 cascade	-4.9525	49	6	1956|3265|3479|3791|5604|5770	EGFR|HRAS|IGF1|KDR|MAP2K1|PTPN1
Biological Process	positive regulation of ERK1 and ERK2 cascade	-4.53115	49	5	1956|3265|3479|3791|5604	EGFR|HRAS|IGF1|KDR|MAP2K1
Biological Process	anatomical structure maturation	-3.41602	49	4	695|3479|3791|4313	BTK|IGF1|KDR|MMP2
Biological Process	developmental maturation	-3.14603	49	4	695|3479|3791|4313	BTK|IGF1|KDR|MMP2
Biological Process	Ras protein signal transduction	-2.45041	49	3	1017|3265|3479	CDK2|HRAS|IGF1
Biological Process	small GTPase mediated signal transduction	-2.05232	49	3	1017|3265|3479	CDK2|HRAS|IGF1
Biological Process	regulation of cellular response to stress	-7.75707	49	11	207|1956|3265|3480|4314|5478|5594|5604|5770|6648|7042	AKT1|EGFR|HRAS|IGF1R|MMP3|PPIA|MAPK1|MAP2K1|PTPN1|SOD2|TGFB2
Biological Process	cellular senescence	-7.69362	49	5	1017|3265|3480|5602|5604	CDK2|HRAS|IGF1R|MAPK10|MAP2K1
Biological Process	regulation of stress-activated MAPK cascade	-7.49659	49	7	1956|3265|3480|5478|5594|5604|7042	EGFR|HRAS|IGF1R|PPIA|MAPK1|MAP2K1|TGFB2
Biological Process	regulation of stress-activated protein kinase signaling cascade	-7.45176	49	7	1956|3265|3480|5478|5594|5604|7042	EGFR|HRAS|IGF1R|PPIA|MAPK1|MAP2K1|TGFB2
Biological Process	chemotaxis	-5.83837	49	8	3265|3815|5478|5588|5594|5604|5747|7042	HRAS|KIT|PPIA|PRKCQ|MAPK1|MAP2K1|PTK2|TGFB2
Biological Process	taxis	-5.82563	49	8	3265|3815|5478|5588|5594|5604|5747|7042	HRAS|KIT|PPIA|PRKCQ|MAPK1|MAP2K1|PTK2|TGFB2
Biological Process	regulation of JNK cascade	-2.79564	49	3	1956|3265|3480	EGFR|HRAS|IGF1R
Biological Process	Fc receptor signaling pathway	-7.7379	49	5	695|3815|5588|5602|5747	BTK|KIT|PRKCQ|MAPK10|PTK2
Biological Process	positive regulation of immune response	-7.66908	49	10	695|1991|3265|3320|3558|3717|5588|5594|5747|7042	BTK|ELANE|HRAS|HSP90AA1|IL2|JAK2|PRKCQ|MAPK1|PTK2|TGFB2
Biological Process	immune response-regulating signaling pathway	-6.85419	49	8	695|834|3265|3815|5588|5594|5602|5747	BTK|CASP1|HRAS|KIT|PRKCQ|MAPK1|MAPK10|PTK2
Biological Process	immune response-regulating cell surface receptor signaling pathway	-6.38043	49	7	695|3265|3815|5588|5594|5602|5747	BTK|HRAS|KIT|PRKCQ|MAPK1|MAPK10|PTK2
Biological Process	Fc-epsilon receptor signaling pathway	-5.10057	49	3	695|5588|5602	BTK|PRKCQ|MAPK10
Biological Process	activation of immune response	-3.69922	49	5	695|3265|3320|5594|5747	BTK|HRAS|HSP90AA1|MAPK1|PTK2
Biological Process	immune response-activating cell surface receptor signaling pathway	-3.08237	49	4	695|3265|5594|5747	BTK|HRAS|MAPK1|PTK2
Biological Process	immune response-activating signal transduction	-3.08237	49	4	695|3265|5594|5747	BTK|HRAS|MAPK1|PTK2
Biological Process	antigen receptor-mediated signaling pathway	-2.35725	49	3	695|3265|5594	BTK|HRAS|MAPK1
Biological Process	peptidyl-tyrosine autophosphorylation	-7.73506	49	4	1956|3480|3643|3791	EGFR|IGF1R|INSR|KDR
Biological Process	positive regulation of protein kinase B signaling	-7.39631	49	6	1956|3320|3480|3643|5747|7046	EGFR|HSP90AA1|IGF1R|INSR|PTK2|TGFBR1
Biological Process	regulation of protein kinase B signaling	-6.23421	49	6	1956|3320|3480|3643|5747|7046	EGFR|HSP90AA1|IGF1R|INSR|PTK2|TGFBR1
Biological Process	axon development	-5.57383	49	7	836|3320|3480|3717|4313|5588|5747	CASP3|HSP90AA1|IGF1R|JAK2|MMP2|PRKCQ|PTK2
Biological Process	cell morphogenesis	-4.94375	49	8	367|836|1956|3320|3480|5588|5747|7042	AR|CASP3|EGFR|HSP90AA1|IGF1R|PRKCQ|PTK2|TGFB2
Biological Process	neuron projection development	-4.12813	49	7	836|3320|3480|3717|4313|5588|5747	CASP3|HSP90AA1|IGF1R|JAK2|MMP2|PRKCQ|PTK2
Biological Process	cell morphogenesis involved in differentiation	-3.71441	49	6	367|836|3320|3480|5588|5747	AR|CASP3|HSP90AA1|IGF1R|PRKCQ|PTK2
Biological Process	establishment of cell polarity	-2.97486	49	3	3320|3480|5747	HSP90AA1|IGF1R|PTK2
Biological Process	axonogenesis	-2.63969	49	4	3320|3480|5588|5747	HSP90AA1|IGF1R|PRKCQ|PTK2
Biological Process	establishment or maintenance of cell polarity	-2.37527	49	3	3320|3480|5747	HSP90AA1|IGF1R|PTK2
Biological Process	cell morphogenesis involved in neuron differentiation	-2.35829	49	4	3320|3480|5588|5747	HSP90AA1|IGF1R|PRKCQ|PTK2
Biological Process	neuron projection morphogenesis	-2.20312	49	4	3320|3480|5588|5747	HSP90AA1|IGF1R|PRKCQ|PTK2
Biological Process	plasma membrane bounded cell projection morphogenesis	-2.18988	49	4	3320|3480|5588|5747	HSP90AA1|IGF1R|PRKCQ|PTK2
Biological Process	cell projection morphogenesis	-2.17677	49	4	3320|3480|5588|5747	HSP90AA1|IGF1R|PRKCQ|PTK2
Biological Process	cell part morphogenesis	-2.11626	49	4	3320|3480|5588|5747	HSP90AA1|IGF1R|PRKCQ|PTK2
Biological Process	positive regulation of DNA metabolic process	-7.58513	49	8	207|1017|1956|3320|3480|3558|5588|5594	AKT1|CDK2|EGFR|HSP90AA1|IGF1R|IL2|PRKCQ|MAPK1
Biological Process	regulation of DNA metabolic process	-5.64676	49	8	207|1017|1956|3320|3480|3558|5588|5594	AKT1|CDK2|EGFR|HSP90AA1|IGF1R|IL2|PRKCQ|MAPK1
Biological Process	peptidyl-serine phosphorylation	-4.92497	49	5	207|1017|5588|5594|7046	AKT1|CDK2|PRKCQ|MAPK1|TGFBR1
Biological Process	peptidyl-serine modification	-4.67732	49	5	207|1017|5588|5594|7046	AKT1|CDK2|PRKCQ|MAPK1|TGFBR1
Biological Process	positive regulation of telomerase activity	-4.63474	49	3	3320|5588|5594	HSP90AA1|PRKCQ|MAPK1
Biological Process	regulation of telomerase activity	-4.20826	49	3	3320|5588|5594	HSP90AA1|PRKCQ|MAPK1
Biological Process	peptidyl-threonine phosphorylation	-3.63729	49	3	207|5594|7046	AKT1|MAPK1|TGFBR1
Biological Process	positive regulation of DNA biosynthetic process	-3.63729	49	3	3320|5588|5594	HSP90AA1|PRKCQ|MAPK1
Biological Process	peptidyl-threonine modification	-3.48826	49	3	207|5594|7046	AKT1|MAPK1|TGFBR1
Biological Process	regulation of protein ubiquitination	-3.40055	49	4	207|3320|5478|7046	AKT1|HSP90AA1|PPIA|TGFBR1
Biological Process	positive regulation of chromosome organization	-3.17396	49	3	1017|5588|5594	CDK2|PRKCQ|MAPK1
Biological Process	regulation of protein modification by small protein conjugation or removal	-3.10751	49	4	207|3320|5478|7046	AKT1|HSP90AA1|PPIA|TGFBR1
Biological Process	regulation of DNA biosynthetic process	-3.01632	49	3	3320|5588|5594	HSP90AA1|PRKCQ|MAPK1
Biological Process	regulation of chromosome organization	-2.10777	49	3	1017|5588|5594	CDK2|PRKCQ|MAPK1
Biological Process	response to nutrient levels	-7.42518	49	9	207|213|383|590|3480|5009|5594|6648|6772	AKT1|ALB|ARG1|BCHE|IGF1R|OTC|MAPK1|SOD2|STAT1
Biological Process	response to extracellular stimulus	-7.16097	49	9	207|213|383|590|3480|5009|5594|6648|6772	AKT1|ALB|ARG1|BCHE|IGF1R|OTC|MAPK1|SOD2|STAT1
Biological Process	response to nutrient	-6.9029	49	6	383|590|3480|5009|6648|6772	ARG1|BCHE|IGF1R|OTC|SOD2|STAT1
Biological Process	response to vitamin	-6.78249	49	5	383|590|3480|5009|6648	ARG1|BCHE|IGF1R|OTC|SOD2
Biological Process	response to hydrogen peroxide	-6.08774	49	5	383|836|4313|6648|6772	ARG1|CASP3|MMP2|SOD2|STAT1
Biological Process	response to axon injury	-5.67545	49	4	383|3717|4313|6648	ARG1|JAK2|MMP2|SOD2
Biological Process	tissue remodeling	-4.75772	49	4	383|4313|4846|5340	ARG1|MMP2|NOS3|PLG
Biological Process	response to zinc ion	-4.05145	49	3	383|5009|6648	ARG1|OTC|SOD2
Biological Process	liver development	-2.98509	49	3	383|5009|6648	ARG1|OTC|SOD2
Biological Process	hepaticobiliary system development	-2.95466	49	3	383|5009|6648	ARG1|OTC|SOD2
Biological Process	aging	-2.61009	49	3	383|4313|6648	ARG1|MMP2|SOD2
Biological Process	cellular amide metabolic process	-2.04503	49	5	383|590|1991|5009|6648	ARG1|BCHE|ELANE|OTC|SOD2
Biological Process	positive regulation of protein localization	-7.40858	49	9	207|1956|2147|3265|3479|3717|5478|5950|7042	AKT1|EGFR|F2|HRAS|IGF1|JAK2|PPIA|RBP4|TGFB2
Biological Process	activation of protein kinase activity	-7.05033	49	6	3479|3643|3717|5478|5604|7042	IGF1|INSR|JAK2|PPIA|MAP2K1|TGFB2
Biological Process	regulation of protein transport	-5.90946	49	8	3265|3479|3717|4843|5478|5770|5950|7042	HRAS|IGF1|JAK2|NOS2|PPIA|PTPN1|RBP4|TGFB2
Biological Process	regulation of hormone levels	-5.88991	49	8	590|695|2099|3480|3717|4843|5950|7276	BCHE|BTK|ESR1|IGF1R|JAK2|NOS2|RBP4|TTR
Biological Process	regulation of establishment of protein localization	-5.75029	49	8	3265|3479|3717|4843|5478|5770|5950|7042	HRAS|IGF1|JAK2|NOS2|PPIA|PTPN1|RBP4|TGFB2
Biological Process	positive regulation of protein secretion	-5.68259	49	5	3479|3717|5478|5950|7042	IGF1|JAK2|PPIA|RBP4|TGFB2
Biological Process	regulation of protein secretion	-5.48221	49	6	3479|3717|4843|5478|5950|7042	IGF1|JAK2|NOS2|PPIA|RBP4|TGFB2
Biological Process	positive regulation of protein transport	-5.10751	49	6	3265|3479|3717|5478|5950|7042	HRAS|IGF1|JAK2|PPIA|RBP4|TGFB2
Biological Process	positive regulation of establishment of protein localization	-4.97629	49	6	3265|3479|3717|5478|5950|7042	HRAS|IGF1|JAK2|PPIA|RBP4|TGFB2
Biological Process	regulation of secretion	-4.26307	49	7	1066|3479|3717|4843|5478|5950|7042	CES1|IGF1|JAK2|NOS2|PPIA|RBP4|TGFB2
Biological Process	positive regulation of secretion by cell	-4.07357	49	5	3479|3717|5478|5950|7042	IGF1|JAK2|PPIA|RBP4|TGFB2
Biological Process	positive regulation of secretion	-3.8837	49	5	3479|3717|5478|5950|7042	IGF1|JAK2|PPIA|RBP4|TGFB2
Biological Process	regulation of secretion by cell	-3.57563	49	6	3479|3717|4843|5478|5950|7042	IGF1|JAK2|NOS2|PPIA|RBP4|TGFB2
Biological Process	regulation of dephosphorylation	-2.90562	49	3	3717|5478|7042	JAK2|PPIA|TGFB2
Biological Process	regulation of insulin secretion	-2.7527	49	3	3717|4843|5950	JAK2|NOS2|RBP4
Biological Process	regulation of peptide hormone secretion	-2.52399	49	3	3717|4843|5950	JAK2|NOS2|RBP4
Biological Process	regulation of peptide secretion	-2.50344	49	3	3717|4843|5950	JAK2|NOS2|RBP4
Biological Process	regulation of peptide transport	-2.48326	49	3	3717|4843|5950	JAK2|NOS2|RBP4
Biological Process	regulation of hormone secretion	-2.1967	49	3	3717|4843|5950	JAK2|NOS2|RBP4
Biological Process	regulation of fibroblast proliferation	-6.72638	49	5	1021|1956|2099|3479|6648	CDK6|EGFR|ESR1|IGF1|SOD2
Biological Process	positive regulation of fibroblast proliferation	-5.94722	49	4	1021|1956|2099|3479	CDK6|EGFR|ESR1|IGF1
Biological Process	regulation of osteoblast differentiation	-2.84022	49	3	1021|3479|5747	CDK6|IGF1|PTK2
Biological Process	positive regulation of lipid metabolic process	-6.69713	49	6	207|1066|2147|3480|3815|5747	AKT1|CES1|F2|IGF1R|KIT|PTK2
Biological Process	response to alcohol	-5.61475	49	6	207|1066|3480|3558|6648|7046	AKT1|CES1|IGF1R|IL2|SOD2|TGFBR1
Biological Process	cellular response to alcohol	-4.75772	49	4	207|1066|3480|6648	AKT1|CES1|IGF1R|SOD2
Biological Process	regulation of lipid metabolic process	-4.7345	49	6	207|1066|2147|3480|3815|5747	AKT1|CES1|F2|IGF1R|KIT|PTK2
Biological Process	regulation of steroid metabolic process	-3.19827	49	3	1066|3480|3815	CES1|IGF1R|KIT
Biological Process	regulation of lipid biosynthetic process	-2.52399	49	3	207|1066|3480	AKT1|CES1|IGF1R
Biological Process	negative regulation of intracellular signal transduction	-6.66022	49	9	207|2099|3480|4318|5478|5770|6648|6772|7042	AKT1|ESR1|IGF1R|MMP9|PPIA|PTPN1|SOD2|STAT1|TGFB2
Biological Process	negative regulation of intrinsic apoptotic signaling pathway	-6.17081	49	5	207|4318|5478|5770|6648	AKT1|MMP9|PPIA|PTPN1|SOD2
Biological Process	negative regulation of oxidative stress-induced intrinsic apoptotic signaling pathway	-5.34789	49	3	207|5478|6648	AKT1|PPIA|SOD2
Biological Process	regulation of oxidative stress-induced cell death	-5.09759	49	4	207|4314|5478|6648	AKT1|MMP3|PPIA|SOD2
Biological Process	regulation of intrinsic apoptotic signaling pathway	-5.06762	49	5	207|4318|5478|5770|6648	AKT1|MMP9|PPIA|PTPN1|SOD2
Biological Process	regulation of oxidative stress-induced intrinsic apoptotic signaling pathway	-4.84649	49	3	207|5478|6648	AKT1|PPIA|SOD2
Biological Process	regulation of cellular response to oxidative stress	-4.79426	49	4	207|4314|5478|6648	AKT1|MMP3|PPIA|SOD2
Biological Process	regulation of response to oxidative stress	-4.63591	49	4	207|4314|5478|6648	AKT1|MMP3|PPIA|SOD2
Biological Process	negative regulation of phosphate metabolic process	-4.11853	49	6	207|836|3558|5478|5770|7042	AKT1|CASP3|IL2|PPIA|PTPN1|TGFB2
Biological Process	negative regulation of phosphorus metabolic process	-4.11311	49	6	207|836|3558|5478|5770|7042	AKT1|CASP3|IL2|PPIA|PTPN1|TGFB2
Biological Process	negative regulation of oxidative stress-induced cell death	-4.00326	49	3	207|5478|6648	AKT1|PPIA|SOD2
Biological Process	negative regulation of protein phosphorylation	-3.65142	49	5	207|836|3558|5478|5770	AKT1|CASP3|IL2|PPIA|PTPN1
Biological Process	negative regulation of phosphorylation	-3.41918	49	5	207|836|3558|5478|5770	AKT1|CASP3|IL2|PPIA|PTPN1
Biological Process	negative regulation of protein kinase activity	-3.40055	49	4	207|836|5478|5770	AKT1|CASP3|PPIA|PTPN1
Biological Process	negative regulation of kinase activity	-3.22619	49	4	207|836|5478|5770	AKT1|CASP3|PPIA|PTPN1
Biological Process	negative regulation of transferase activity	-3.00942	49	4	207|836|5478|5770	AKT1|CASP3|PPIA|PTPN1
Biological Process	negative regulation of protein serine/threonine kinase activity	-2.98509	49	3	207|836|5770	AKT1|CASP3|PTPN1
Biological Process	negative regulation of protein modification process	-2.81897	49	5	207|836|3558|5478|5770	AKT1|CASP3|IL2|PPIA|PTPN1
Biological Process	negative regulation of MAPK cascade	-2.50344	49	3	3480|5478|5770	IGF1R|PPIA|PTPN1
Biological Process	response to growth hormone	-6.61662	49	4	207|3717|5747|5770	AKT1|JAK2|PTK2|PTPN1
Biological Process	regulation of cellular localization	-5.61961	49	9	207|367|1956|2147|3265|3717|5594|5604|5770	AKT1|AR|EGFR|F2|HRAS|JAK2|MAPK1|MAP2K1|PTPN1
Biological Process	growth hormone receptor signaling pathway	-5.34789	49	3	3717|5747|5770	JAK2|PTK2|PTPN1
Biological Process	cellular response to growth hormone stimulus	-5.28144	49	3	3717|5747|5770	JAK2|PTK2|PTPN1
Biological Process	regulation of intracellular transport	-3.69922	49	5	3265|3717|5594|5604|5770	HRAS|JAK2|MAPK1|MAP2K1|PTPN1
Biological Process	regulation of intracellular protein transport	-2.2387	49	3	3265|3717|5770	HRAS|JAK2|PTPN1
Biological Process	lung development	-6.41772	49	6	383|3791|4846|5594|5604|5950	ARG1|KDR|NOS3|MAPK1|MAP2K1|RBP4
Biological Process	respiratory tube development	-6.35976	49	6	383|3791|4846|5594|5604|5950	ARG1|KDR|NOS3|MAPK1|MAP2K1|RBP4
Biological Process	respiratory system development	-6.08913	49	6	383|3791|4846|5594|5604|5950	ARG1|KDR|NOS3|MAPK1|MAP2K1|RBP4
Biological Process	anatomical structure homeostasis	-4.0515	49	5	213|3791|4846|5340|5950	ALB|KDR|NOS3|PLG|RBP4
Biological Process	tissue homeostasis	-3.23998	49	4	213|3791|4846|5950	ALB|KDR|NOS3|RBP4
Biological Process	multicellular organismal homeostasis	-2.54651	49	4	213|3791|4846|5950	ALB|KDR|NOS3|RBP4
Biological Process	sensory organ morphogenesis	-2.05232	49	3	3791|5594|5950	KDR|MAPK1|RBP4
Biological Process	cellular response to cadmium ion	-6.41079	49	4	207|1956|4318|5594	AKT1|EGFR|MMP9|MAPK1
Biological Process	cellular response to inorganic substance	-5.82291	49	6	207|1017|1956|4314|4318|5594	AKT1|CDK2|EGFR|MMP3|MMP9|MAPK1
Biological Process	ERBB signaling pathway	-5.58388	49	4	207|1956|5594|5747	AKT1|EGFR|MAPK1|PTK2
Biological Process	regulation of protein catabolic process	-4.36529	49	6	207|1017|1956|3320|4843|5747	AKT1|CDK2|EGFR|HSP90AA1|NOS2|PTK2
Biological Process	regulation of protein localization to cell periphery	-4.30336	49	4	207|367|1956|3265	AKT1|AR|EGFR|HRAS
Biological Process	response to epidermal growth factor	-4.20826	49	3	207|1956|5594	AKT1|EGFR|MAPK1
Biological Process	epidermal growth factor receptor signaling pathway	-4.18073	49	3	207|1956|5747	AKT1|EGFR|PTK2
Biological Process	regulation of protein localization to membrane	-3.75376	49	4	207|367|1956|3265	AKT1|AR|EGFR|HRAS
Biological Process	cellular response to metal ion	-3.58869	49	4	207|1956|4318|5594	AKT1|EGFR|MMP9|MAPK1
Biological Process	regulation of leukocyte migration	-3.35505	49	4	207|1991|5594|5747	AKT1|ELANE|MAPK1|PTK2
Biological Process	regulation of chemotaxis	-3.30362	49	4	1991|3791|5594|5747	ELANE|KDR|MAPK1|PTK2
Biological Process	regulation of protein localization to plasma membrane	-3.19827	49	3	207|367|1956	AKT1|AR|EGFR
Biological Process	positive regulation of protein localization to membrane	-3.19827	49	3	207|1956|3265	AKT1|EGFR|HRAS
Biological Process	positive regulation of peptidyl-serine phosphorylation	-3.15013	49	3	207|1956|3320	AKT1|EGFR|HSP90AA1
Biological Process	regulation of cellular protein catabolic process	-3.07615	49	4	207|1017|3320|5747	AKT1|CDK2|HSP90AA1|PTK2
Biological Process	regulation of cyclin-dependent protein serine/threonine kinase activity	-3.07026	49	3	207|836|1956	AKT1|CASP3|EGFR
Biological Process	regulation of mononuclear cell migration	-3.0376	49	3	207|5594|5747	AKT1|MAPK1|PTK2
Biological Process	regulation of cyclin-dependent protein kinase activity	-3.0376	49	3	207|836|1956	AKT1|CASP3|EGFR
Biological Process	positive regulation of chemotaxis	-2.81327	49	3	3791|5594|5747	KDR|MAPK1|PTK2
Biological Process	regulation of peptidyl-serine phosphorylation	-2.77828	49	3	207|1956|3320	AKT1|EGFR|HSP90AA1
Biological Process	positive regulation of cellular protein catabolic process	-2.67131	49	3	207|3320|5747	AKT1|HSP90AA1|PTK2
Biological Process	regulation of ubiquitin-dependent protein catabolic process	-2.59528	49	3	207|1017|5747	AKT1|CDK2|PTK2
Biological Process	regulation of G1/S transition of mitotic cell cycle	-2.47001	49	3	207|1017|1956	AKT1|CDK2|EGFR
Biological Process	regulation of cell cycle G1/S phase transition	-2.29921	49	3	207|1017|1956	AKT1|CDK2|EGFR
Biological Process	regulation of proteolysis involved in cellular protein catabolic process	-2.2387	49	3	207|1017|5747	AKT1|CDK2|PTK2
Biological Process	positive regulation of protein catabolic process	-2.19157	49	3	207|3320|5747	AKT1|HSP90AA1|PTK2
Biological Process	positive regulation of phospholipase C activity	-6.27128	49	4	1956|2099|3265|3815	EGFR|ESR1|HRAS|KIT
Biological Process	regulation of phospholipase C activity	-6.18427	49	4	1956|2099|3265|3815	EGFR|ESR1|HRAS|KIT
Biological Process	cell population proliferation	-5.92915	49	8	207|2099|3479|3815|5594|5604|6772|7042	AKT1|ESR1|IGF1|KIT|MAPK1|MAP2K1|STAT1|TGFB2
Biological Process	positive regulation of phospholipase activity	-5.70712	49	4	1956|2099|3265|3815	EGFR|ESR1|HRAS|KIT
Biological Process	regulation of phospholipase activity	-5.38787	49	4	1956|2099|3265|3815	EGFR|ESR1|HRAS|KIT
Biological Process	positive regulation of lipase activity	-5.33584	49	4	1956|2099|3265|3815	EGFR|ESR1|HRAS|KIT
Biological Process	regulation of production of miRNAs involved in gene silencing by miRNA	-5.28144	49	3	1956|2099|5604	EGFR|ESR1|MAP2K1
Biological Process	stem cell differentiation	-5.23459	49	5	1021|2099|3815|5594|7042	CDK6|ESR1|KIT|MAPK1|TGFB2
Biological Process	regulation of production of small RNA involved in gene silencing by RNA	-5.21826	49	3	1956|2099|5604	EGFR|ESR1|MAP2K1
Biological Process	epithelial cell proliferation	-4.85063	49	4	2099|3815|5594|5604	ESR1|KIT|MAPK1|MAP2K1
Biological Process	regulation of lipase activity	-4.85063	49	4	1956|2099|3265|3815	EGFR|ESR1|HRAS|KIT
Biological Process	positive regulation of hydrolase activity	-4.42024	49	7	207|834|1956|2099|3265|3717|3815	AKT1|CASP1|EGFR|ESR1|HRAS|JAK2|KIT
Biological Process	regulation of miRNA-mediated gene silencing	-4.38745	49	3	1956|2099|5604	EGFR|ESR1|MAP2K1
Biological Process	regulation of post-transcriptional gene silencing by RNA	-4.32485	49	3	1956|2099|5604	EGFR|ESR1|MAP2K1
Biological Process	regulation of post-transcriptional gene silencing	-4.29467	49	3	1956|2099|5604	EGFR|ESR1|MAP2K1
Biological Process	regulation of gene silencing by RNA	-4.26521	49	3	1956|2099|5604	EGFR|ESR1|MAP2K1
Biological Process	cellular response to estradiol stimulus	-6.27128	49	4	1956|2099|3480|4313	EGFR|ESR1|IGF1R|MMP2
Biological Process	response to nicotine	-5.91076	49	4	836|3480|4313|5594	CASP3|IGF1R|MMP2|MAPK1
Biological Process	response to amino acid	-5.85691	49	5	383|836|1956|3480|4313	ARG1|CASP3|EGFR|IGF1R|MMP2
Biological Process	response to estradiol	-5.76789	49	5	836|1956|2099|3480|4313	CASP3|EGFR|ESR1|IGF1R|MMP2
Biological Process	response to acid chemical	-5.60071	49	5	383|836|1956|3480|4313	ARG1|CASP3|EGFR|IGF1R|MMP2
Biological Process	pallium development	-3.79294	49	4	836|1021|1956|3480	CASP3|CDK6|EGFR|IGF1R
Biological Process	head development	-3.57264	49	7	836|1021|1956|3480|4313|5594|5604	CASP3|CDK6|EGFR|IGF1R|MMP2|MAPK1|MAP2K1
Biological Process	hippocampus development	-3.53596	49	3	836|1021|3480	CASP3|CDK6|IGF1R
Biological Process	telencephalon development	-3.16567	49	4	836|1021|1956|3480	CASP3|CDK6|EGFR|IGF1R
Biological Process	limbic system development	-3.15013	49	3	836|1021|3480	CASP3|CDK6|IGF1R
Biological Process	response to ethanol	-3.01632	49	3	3480|3558|6648	IGF1R|IL2|SOD2
Biological Process	response to monosaccharide	-2.67131	49	3	836|3480|6648	CASP3|IGF1R|SOD2
Biological Process	forebrain development	-2.50008	49	4	836|1021|1956|3480	CASP3|CDK6|EGFR|IGF1R
Biological Process	response to carbohydrate	-2.48326	49	3	836|3480|6648	CASP3|IGF1R|SOD2
Biological Process	brain development	-2.15603	49	5	836|1021|1956|3480|5604	CASP3|CDK6|EGFR|IGF1R|MAP2K1
Biological Process	response to mechanical stimulus	-6.02597	49	6	834|3480|3815|4313|5747|6772	CASP1|IGF1R|KIT|MMP2|PTK2|STAT1
Biological Process	cellular response to external stimulus	-2.80497	49	4	213|834|3480|5594	ALB|CASP1|IGF1R|MAPK1
Biological Process	positive regulation of cellular component biogenesis	-5.92915	49	8	1017|2099|3265|3320|3791|3815|4314|7046	CDK2|ESR1|HRAS|HSP90AA1|KDR|KIT|MMP3|TGFBR1
Biological Process	positive regulation of protein-containing complex assembly	-2.4248	49	3	2099|3320|4314	ESR1|HSP90AA1|MMP3
Biological Process	regulation of platelet activation	-5.87506	49	4	2147|3717|4846|5588	F2|JAK2|NOS3|PRKCQ
Biological Process	response to tumor necrosis factor	-4.71822	49	5	207|836|3717|5594|6772	AKT1|CASP3|JAK2|MAPK1|STAT1
Biological Process	positive regulation of receptor signaling pathway via JAK-STAT	-4.48758	49	3	2147|3717|3815	F2|JAK2|KIT
Biological Process	homeostasis of number of cells	-4.37776	49	5	207|836|3717|3815|4846	AKT1|CASP3|JAK2|KIT|NOS3
Biological Process	positive regulation of receptor signaling pathway via STAT	-4.35576	49	3	2147|3717|3815	F2|JAK2|KIT
Biological Process	cellular response to tumor necrosis factor	-3.69677	49	4	207|3717|5594|6772	AKT1|JAK2|MAPK1|STAT1
Biological Process	regulation of receptor signaling pathway via JAK-STAT	-3.58558	49	3	2147|3717|3815	F2|JAK2|KIT
Biological Process	positive regulation of protein localization to nucleus	-3.45747	49	3	207|2147|3717	AKT1|F2|JAK2
Biological Process	regulation of receptor signaling pathway via STAT	-3.41269	49	3	2147|3717|3815	F2|JAK2|KIT
Biological Process	erythrocyte differentiation	-3.38372	49	3	836|3717|3815	CASP3|JAK2|KIT
Biological Process	erythrocyte homeostasis	-3.26129	49	3	836|3717|3815	CASP3|JAK2|KIT
Biological Process	myeloid cell differentiation	-3.21934	49	4	836|3717|3815|4318	CASP3|JAK2|KIT|MMP9
Biological Process	myeloid cell homeostasis	-3.00582	49	3	836|3717|3815	CASP3|JAK2|KIT
Biological Process	regulation of protein localization to nucleus	-2.88656	49	3	207|2147|3717	AKT1|F2|JAK2
Biological Process	myeloid leukocyte activation	-2.83117	49	3	695|3717|3815	BTK|JAK2|KIT
Biological Process	cytokine-mediated signaling pathway	-2.55945	49	4	207|3717|3815|6772	AKT1|JAK2|KIT|STAT1
Biological Process	myeloid leukocyte mediated immunity	-5.84011	49	4	695|1991|2147|3815	BTK|ELANE|F2|KIT
Biological Process	positive regulation of lipid kinase activity	-4.5228	49	3	2147|3815|5747	F2|KIT|PTK2
Biological Process	immune effector process	-4.15133	49	6	695|1991|2147|3558|3815|5747	BTK|ELANE|F2|IL2|KIT|PTK2
Biological Process	regulation of cell shape	-3.9602	49	4	2147|3791|3815|5747	F2|KDR|KIT|PTK2
Biological Process	regulation of lipid kinase activity	-3.70979	49	3	2147|3815|5747	F2|KIT|PTK2
Biological Process	leukocyte mediated immunity	-2.98006	49	4	695|1991|2147|3815	BTK|ELANE|F2|KIT
Biological Process	regulation of cell development	-2.89014	49	5	207|2147|3479|3815|5604	AKT1|F2|IGF1|KIT|MAP2K1
Biological Process	regulation of cell morphogenesis	-2.81531	49	4	2147|3791|3815|5747	F2|KDR|KIT|PTK2
Biological Process	regulation of nervous system development	-2.24024	49	4	207|2147|3815|5604	AKT1|F2|KIT|MAP2K1
Biological Process	leukocyte migration	-5.71108	49	6	1991|3815|4318|5340|5478|7042	ELANE|KIT|MMP9|PLG|PPIA|TGFB2
Biological Process	regulation of Notch signaling pathway	-4.72198	49	4	207|3815|4846|7042	AKT1|KIT|NOS3|TGFB2
Biological Process	positive regulation of Notch signaling pathway	-4.18073	49	3	3815|4846|7042	KIT|NOS3|TGFB2
Biological Process	cell chemotaxis	-3.44745	49	4	3815|5478|5588|7042	KIT|PPIA|PRKCQ|TGFB2
Biological Process	myeloid leukocyte migration	-2.95466	49	3	3815|5478|7042	KIT|PPIA|TGFB2
Biological Process	cell division	-2.8825	49	5	1017|1021|2908|3815|7042	CDK2|CDK6|NR3C1|KIT|TGFB2
Biological Process	leukocyte chemotaxis	-2.76969	49	3	3815|5478|7042	KIT|PPIA|TGFB2
Biological Process	positive regulation of nitric-oxide synthase biosynthetic process	-5.5708	49	3	3717|3791|6772	JAK2|KDR|STAT1
Biological Process	regulation of nitric-oxide synthase biosynthetic process	-5.28144	49	3	3717|3791|6772	JAK2|KDR|STAT1
Biological Process	post-embryonic development	-4.90899	49	4	3717|3791|6648|7046	JAK2|KDR|SOD2|TGFBR1
Biological Process	regulation of cell-substrate adhesion	-4.55952	49	5	1021|3717|3791|5340|5747	CDK6|JAK2|KDR|PLG|PTK2
Biological Process	positive regulation of transmembrane receptor protein serine/threonine kinase signaling pathway	-4.35897	49	4	3717|3791|7042|7046	JAK2|KDR|TGFB2|TGFBR1
Biological Process	hematopoietic progenitor cell differentiation	-3.32778	49	3	1021|3791|3815	CDK6|KDR|KIT
Biological Process	regulation of epithelial cell apoptotic process	-3.31419	49	3	3480|3717|3791	IGF1R|JAK2|KDR
Biological Process	positive regulation of cell-substrate adhesion	-2.98509	49	3	1021|3717|3791	CDK6|JAK2|KDR
Biological Process	regulation of cell-matrix adhesion	-2.96471	49	3	1021|3791|5747	CDK6|KDR|PTK2
Biological Process	regulation of transmembrane receptor protein serine/threonine kinase signaling pathway	-2.93427	49	4	3717|3791|7042|7046	JAK2|KDR|TGFB2|TGFBR1
Biological Process	cell fate commitment	-2.1366	49	3	836|3791|7046	CASP3|KDR|TGFBR1
Biological Process	digestive system development	-5.50662	49	5	1956|3643|3815|5009|7042	EGFR|INSR|KIT|OTC|TGFB2
Biological Process	activation of protein kinase B activity	-4.75752	49	3	3479|3643|5478	IGF1|INSR|PPIA
Biological Process	exocrine system development	-4.32485	49	3	1956|3643|7042	EGFR|INSR|TGFB2
Biological Process	digestive tract development	-4.26288	49	4	1956|3815|5009|7042	EGFR|KIT|OTC|TGFB2
Biological Process	epidermis development	-3.8837	49	5	836|1956|3643|5604|7042	CASP3|EGFR|INSR|MAP2K1|TGFB2
Biological Process	skin development	-3.08237	49	4	836|1956|5604|7042	CASP3|EGFR|MAP2K1|TGFB2
Biological Process	movement in host environment	-2.85854	49	3	1956|3643|5478	EGFR|INSR|PPIA
Biological Process	biological process involved in interaction with host	-2.73596	49	3	1956|3643|5478	EGFR|INSR|PPIA
Biological Process	viral life cycle	-2.50344	49	3	1956|3643|5478	EGFR|INSR|PPIA
Biological Process	viral process	-2.11729	49	3	1956|3643|5478	EGFR|INSR|PPIA
Biological Process	behavior	-5.44448	49	8	207|590|836|1956|3643|3815|5594|6648	AKT1|BCHE|CASP3|EGFR|INSR|KIT|MAPK1|SOD2
Biological Process	learning or memory	-5.35675	49	6	590|836|1956|3643|3815|5594	BCHE|CASP3|EGFR|INSR|KIT|MAPK1
Biological Process	cognition	-4.99229	49	6	590|836|1956|3643|3815|5594	BCHE|CASP3|EGFR|INSR|KIT|MAPK1
Biological Process	learning	-2.7527	49	3	590|3643|3815	BCHE|INSR|KIT
Biological Process	protein processing	-2.45041	49	3	590|834|836	BCHE|CASP1|CASP3
Biological Process	protein maturation	-2.07507	49	3	590|834|836	BCHE|CASP1|CASP3
Biological Process	negative regulation of catalytic activity	-5.37311	49	9	207|836|3265|4318|4846|5265|5478|5770|7042	AKT1|CASP3|HRAS|MMP9|NOS3|SERPINA1|PPIA|PTPN1|TGFB2
Biological Process	regulation of proteolysis	-4.61297	49	8	207|834|1017|2147|3717|4318|5265|5747	AKT1|CASP1|CDK2|F2|JAK2|MMP9|SERPINA1|PTK2
Biological Process	negative regulation of hydrolase activity	-4.52915	49	6	207|3265|4318|4846|5265|7042	AKT1|HRAS|MMP9|NOS3|SERPINA1|TGFB2
Biological Process	regulation of binding	-3.49874	49	5	207|3479|3717|4318|7046	AKT1|IGF1|JAK2|MMP9|TGFBR1
Biological Process	regulation of cysteine-type endopeptidase activity involved in apoptotic process	-3.47145	49	4	207|834|3717|4318	AKT1|CASP1|JAK2|MMP9
Biological Process	regulation of transmembrane transport	-3.38365	49	6	207|383|2147|3479|3643|4318	AKT1|ARG1|F2|IGF1|INSR|MMP9
Biological Process	regulation of cysteine-type endopeptidase activity	-3.28211	49	4	207|834|3717|4318	AKT1|CASP1|JAK2|MMP9
Biological Process	regulation of endopeptidase activity	-3.2044	49	5	207|834|3717|4318|5265	AKT1|CASP1|JAK2|MMP9|SERPINA1
Biological Process	regulation of peptidase activity	-3.07172	49	5	207|834|3717|4318|5265	AKT1|CASP1|JAK2|MMP9|SERPINA1
Biological Process	regulation of ion transport	-3.05399	49	6	207|383|1066|2147|4318|4846	AKT1|ARG1|CES1|F2|MMP9|NOS3
Biological Process	negative regulation of proteolysis	-2.59454	49	4	207|2147|4318|5265	AKT1|F2|MMP9|SERPINA1
Biological Process	positive regulation of proteolysis	-2.52099	49	4	207|834|3717|5747	AKT1|CASP1|JAK2|PTK2
Biological Process	regulation of protein binding	-2.39359	49	3	207|4318|7046	AKT1|MMP9|TGFBR1
Biological Process	negative regulation of endopeptidase activity	-2.10303	49	3	207|4318|5265	AKT1|MMP9|SERPINA1
Biological Process	negative regulation of peptidase activity	-2.05232	49	3	207|4318|5265	AKT1|MMP9|SERPINA1
Biological Process	uterus development	-5.28144	49	3	2099|5950|7042	ESR1|RBP4|TGFB2
Biological Process	regulation of organ growth	-4.65276	49	4	207|3479|5950|7046	AKT1|IGF1|RBP4|TGFBR1
Biological Process	regulation of cardiac muscle tissue growth	-3.7477	49	3	3479|5950|7046	IGF1|RBP4|TGFBR1
Biological Process	regulation of heart growth	-3.61981	49	3	3479|5950|7046	IGF1|RBP4|TGFBR1
Biological Process	hormone metabolic process	-3.51231	49	4	590|2099|5950|7276	BCHE|ESR1|RBP4|TTR
Biological Process	primary alcohol metabolic process	-3.30075	49	3	3479|5950|7276	IGF1|RBP4|TTR
Biological Process	organic hydroxy compound metabolic process	-3.01725	49	5	1066|3479|5950|7042|7276	CES1|IGF1|RBP4|TGFB2|TTR
Biological Process	cellular hormone metabolic process	-2.94468	49	3	2099|5950|7276	ESR1|RBP4|TTR
Biological Process	alcohol metabolic process	-2.76432	49	4	1066|3479|5950|7276	CES1|IGF1|RBP4|TTR
Biological Process	cellular homeostasis	-5.18314	49	8	1991|2147|3480|3934|4843|4846|5340|5594	ELANE|F2|IGF1R|LCN2|NOS2|NOS3|PLG|MAPK1
Biological Process	cation homeostasis	-4.89765	49	7	1991|2147|3791|3934|5009|5594|6648	ELANE|F2|KDR|LCN2|OTC|MAPK1|SOD2
Biological Process	inorganic ion homeostasis	-4.84619	49	7	1991|2147|3791|3934|5009|5594|6648	ELANE|F2|KDR|LCN2|OTC|MAPK1|SOD2
Biological Process	ion homeostasis	-4.75174	49	7	1991|2147|3791|3934|5009|5594|6648	ELANE|F2|KDR|LCN2|OTC|MAPK1|SOD2
Biological Process	acute inflammatory response	-3.60258	49	3	1991|2147|5265	ELANE|F2|SERPINA1
Biological Process	defense response to Gram-negative bacterium	-3.44236	49	3	1991|2147|4843	ELANE|F2|NOS2
Biological Process	metal ion homeostasis	-3.33308	49	5	1991|2147|3791|3934|6648	ELANE|F2|KDR|LCN2|SOD2
Biological Process	cellular chemical homeostasis	-2.81531	49	5	1991|2147|3480|3934|5594	ELANE|F2|IGF1R|LCN2|MAPK1
Biological Process	defense response to bacterium	-2.59899	49	4	1991|2147|3934|4843	ELANE|F2|LCN2|NOS2
Biological Process	cellular cation homeostasis	-2.41949	49	4	1991|2147|3934|5594	ELANE|F2|LCN2|MAPK1
Biological Process	cellular ion homeostasis	-2.36203	49	4	1991|2147|3934|5594	ELANE|F2|LCN2|MAPK1
Biological Process	calcium ion homeostasis	-2.32785	49	3	1991|2147|3791	ELANE|F2|KDR
Biological Process	divalent inorganic cation homeostasis	-2.09832	49	3	1991|2147|3791	ELANE|F2|KDR
Biological Process	response to antibiotic	-4.23641	49	3	836|3320|3717	CASP3|HSP90AA1|JAK2
Biological Process	regulation of protein stability	-2.73949	49	4	836|3320|3479|5594	CASP3|HSP90AA1|IGF1|MAPK1
Biological Process	positive regulation of cell projection organization	-3.63966	49	5	3265|3480|3815|5604|7046	HRAS|IGF1R|KIT|MAP2K1|TGFBR1
Biological Process	regulation of plasma membrane bounded cell projection organization	-3.29775	49	6	207|3265|3480|3815|5604|7046	AKT1|HRAS|IGF1R|KIT|MAP2K1|TGFBR1
Biological Process	regulation of cell projection organization	-3.23657	49	6	207|3265|3480|3815|5604|7046	AKT1|HRAS|IGF1R|KIT|MAP2K1|TGFBR1
Biological Process	modulation of chemical synaptic transmission	-3.16352	49	5	590|3265|3717|3815|5594	BCHE|HRAS|JAK2|KIT|MAPK1
Biological Process	positive regulation of plasma membrane bounded cell projection assembly	-3.16199	49	3	3265|3815|7046	HRAS|KIT|TGFBR1
Biological Process	regulation of trans-synaptic signaling	-3.15904	49	5	590|3265|3717|3815|5594	BCHE|HRAS|JAK2|KIT|MAPK1
Biological Process	regulation of plasma membrane bounded cell projection assembly	-2.39976	49	3	3265|3815|7046	HRAS|KIT|TGFBR1
Biological Process	regulation of cell projection assembly	-2.38745	49	3	3265|3815|7046	HRAS|KIT|TGFBR1
Biological Process	regulation of synaptic plasticity	-2.35131	49	3	3265|3815|5594	HRAS|KIT|MAPK1
Biological Process	positive regulation of muscle cell differentiation	-3.47277	49	3	3479|3815|6648	IGF1|KIT|SOD2
Biological Process	regulation of muscle cell differentiation	-2.6557	49	3	3479|3815|6648	IGF1|KIT|SOD2
Biological Process	regulation of muscle system process	-2.09363	49	3	3479|3815|4846	IGF1|KIT|NOS3
Biological Process	maintenance of location in cell	-3.32778	49	3	207|213|3934	AKT1|ALB|LCN2
Biological Process	maintenance of location	-2.6403	49	3	207|213|3934	AKT1|ALB|LCN2
Biological Process	regulation of reactive oxygen species metabolic process	-2.7527	49	3	2147|4314|6648	F2|MMP3|SOD2
Biological Process	regulation of cytokine-mediated signaling pathway	-2.60266	49	3	383|834|5770	ARG1|CASP1|PTPN1
Biological Process	regulation of response to biotic stimulus	-2.58128	49	4	383|3320|5770|6772	ARG1|HSP90AA1|PTPN1|STAT1
Biological Process	regulation of response to cytokine stimulus	-2.5171	49	3	383|834|5770	ARG1|CASP1|PTPN1
Biological Process	regulation of innate immune response	-2.1763	49	3	383|3320|5770	ARG1|HSP90AA1|PTPN1
Biological Process	small molecule biosynthetic process	-2.2855	49	4	834|1066|5009|5950	CASP1|CES1|OTC|RBP4
Cellular Component	vesicle lumen	-14.3868	49	13	213|383|1956|1991|3320|3479|3934|5265|5340|5478|5594|7042|7276	ALB|ARG1|EGFR|ELANE|HSP90AA1|IGF1|LCN2|SERPINA1|PLG|PPIA|MAPK1|TGFB2|TTR
Cellular Component	secretory granule lumen	-12.9426	49	12	213|383|1991|3320|3479|3934|5265|5340|5478|5594|7042|7276	ALB|ARG1|ELANE|HSP90AA1|IGF1|LCN2|SERPINA1|PLG|PPIA|MAPK1|TGFB2|TTR
Cellular Component	cytoplasmic vesicle lumen	-12.8949	49	12	213|383|1991|3320|3479|3934|5265|5340|5478|5594|7042|7276	ALB|ARG1|ELANE|HSP90AA1|IGF1|LCN2|SERPINA1|PLG|PPIA|MAPK1|TGFB2|TTR
Cellular Component	platelet alpha granule lumen	-7.08808	49	5	213|3479|5265|5340|7042	ALB|IGF1|SERPINA1|PLG|TGFB2
Cellular Component	platelet alpha granule	-6.41812	49	5	213|3479|5265|5340|7042	ALB|IGF1|SERPINA1|PLG|TGFB2
Cellular Component	membrane raft	-9.97453	49	10	695|836|1956|3480|3643|3717|3791|4846|5594|7046	BTK|CASP3|EGFR|IGF1R|INSR|JAK2|KDR|NOS3|MAPK1|TGFBR1
Cellular Component	membrane microdomain	-9.96156	49	10	695|836|1956|3480|3643|3717|3791|4846|5594|7046	BTK|CASP3|EGFR|IGF1R|INSR|JAK2|KDR|NOS3|MAPK1|TGFBR1
Cellular Component	caveola	-6.64494	49	5	3480|3643|3717|4846|5594	IGF1R|INSR|JAK2|NOS3|MAPK1
Cellular Component	plasma membrane raft	-5.94996	49	5	3480|3643|3717|4846|5594	IGF1R|INSR|JAK2|NOS3|MAPK1
Cellular Component	receptor complex	-5.60517	49	8	1956|3480|3643|3717|3791|3815|4306|7046	EGFR|IGF1R|INSR|JAK2|KDR|KIT|NR3C2|TGFBR1
Cellular Component	plasma membrane protein complex	-3.84887	49	7	836|1956|3479|3480|3643|3717|7046	CASP3|EGFR|IGF1|IGF1R|INSR|JAK2|TGFBR1
Cellular Component	plasma membrane signaling receptor complex	-2.74442	49	4	3480|3643|3717|7046	IGF1R|INSR|JAK2|TGFBR1
Cellular Component	protein kinase complex	-5.78539	49	5	1017|1021|3480|3643|7046	CDK2|CDK6|IGF1R|INSR|TGFBR1
Cellular Component	transferase complex, transferring phosphorus-containing groups	-4.1034	49	5	1017|1021|3480|3643|7046	CDK2|CDK6|IGF1R|INSR|TGFBR1
Cellular Component	serine/threonine protein kinase complex	-3.16199	49	3	1017|1021|7046	CDK2|CDK6|TGFBR1
Cellular Component	cell leading edge	-2.33236	49	4	207|1021|1956|3643	AKT1|CDK6|EGFR|INSR
Cellular Component	ficolin-1-rich granule lumen	-5.75054	49	5	3320|4318|5265|5478|5594	HSP90AA1|MMP9|SERPINA1|PPIA|MAPK1
Cellular Component	ficolin-1-rich granule	-4.90216	49	5	3320|4318|5265|5478|5594	HSP90AA1|MMP9|SERPINA1|PPIA|MAPK1
Cellular Component	extracellular matrix	-5.45007	49	8	1991|2147|4313|4314|4318|5265|5340|7042	ELANE|F2|MMP2|MMP3|MMP9|SERPINA1|PLG|TGFB2
Cellular Component	external encapsulating structure	-5.44448	49	8	1991|2147|4313|4314|4318|5265|5340|7042	ELANE|F2|MMP2|MMP3|MMP9|SERPINA1|PLG|TGFB2
Cellular Component	collagen-containing extracellular matrix	-5.24338	49	7	1991|2147|4313|4318|5265|5340|7042	ELANE|F2|MMP2|MMP9|SERPINA1|PLG|TGFB2
Cellular Component	vacuolar lumen	-5.03099	49	5	383|1991|3320|5594|7276	ARG1|ELANE|HSP90AA1|MAPK1|TTR
Cellular Component	azurophil granule lumen	-4.83162	49	4	383|1991|5594|7276	ARG1|ELANE|MAPK1|TTR
Cellular Component	primary lysosome	-3.92746	49	4	383|1991|5594|7276	ARG1|ELANE|MAPK1|TTR
Cellular Component	azurophil granule	-3.92746	49	4	383|1991|5594|7276	ARG1|ELANE|MAPK1|TTR
Cellular Component	specific granule lumen	-3.84789	49	3	383|1991|3934	ARG1|ELANE|LCN2
Cellular Component	lytic vacuole	-2.92005	49	6	383|1991|3320|3643|5594|7276	ARG1|ELANE|HSP90AA1|INSR|MAPK1|TTR
Cellular Component	lysosome	-2.92005	49	6	383|1991|3320|3643|5594|7276	ARG1|ELANE|HSP90AA1|INSR|MAPK1|TTR
Cellular Component	specific granule	-2.64797	49	3	383|1991|3934	ARG1|ELANE|LCN2
Cellular Component	endoplasmic reticulum lumen	-4.9604	49	6	213|590|1066|2147|5265|5594	ALB|BCHE|CES1|F2|SERPINA1|MAPK1
Cellular Component	blood microparticle	-4.01631	49	4	213|590|2147|5340	ALB|BCHE|F2|PLG
Cellular Component	side of membrane	-4.88352	49	8	207|2147|3643|3791|3815|5340|5747|5770	AKT1|F2|INSR|KDR|KIT|PLG|PTK2|PTPN1
Cellular Component	cytoplasmic side of membrane	-3.47145	49	4	207|3815|5747|5770	AKT1|KIT|PTK2|PTPN1
Cellular Component	external side of plasma membrane	-3.05477	49	5	2147|3643|3791|3815|5340	F2|INSR|KDR|KIT|PLG
Cellular Component	extrinsic component of plasma membrane	-2.57342	49	3	207|5340|5747	AKT1|PLG|PTK2
Cellular Component	cytoplasmic side of plasma membrane	-2.55197	49	3	207|3815|5747	AKT1|KIT|PTK2
Cellular Component	focal adhesion	-4.22414	49	6	1956|3717|5478|5594|5604|5747	EGFR|JAK2|PPIA|MAPK1|MAP2K1|PTK2
Cellular Component	cell-substrate junction	-4.17347	49	6	1956|3717|5478|5594|5604|5747	EGFR|JAK2|PPIA|MAPK1|MAP2K1|PTK2
Cellular Component	early endosome	-3.27952	49	5	1956|3791|5594|5604|5770	EGFR|KDR|MAPK1|MAP2K1|PTPN1
Cellular Component	late endosome	-2.91747	49	4	1956|3643|5594|5604	EGFR|INSR|MAPK1|MAP2K1
Cellular Component	neuronal cell body	-3.89706	49	6	383|836|3320|3480|3643|7042	ARG1|CASP3|HSP90AA1|IGF1R|INSR|TGFB2
Cellular Component	cell body	-3.59671	49	6	383|836|3320|3480|3643|7042	ARG1|CASP3|HSP90AA1|IGF1R|INSR|TGFB2
Cellular Component	axon	-2.45561	49	5	3320|3480|3643|6772|7042	HSP90AA1|IGF1R|INSR|STAT1|TGFB2
Cellular Component	perinuclear region of cytoplasm	-2.97498	49	6	695|1956|3265|3320|4843|6772	BTK|EGFR|HRAS|HSP90AA1|NOS2|STAT1
Cellular Component	endocytic vesicle	-2.63969	49	4	1956|1991|3320|4846	EGFR|ELANE|HSP90AA1|NOS3
Cellular Component	mitochondrial matrix	-2.11005	49	4	2908|5009|5770|6648	NR3C1|OTC|PTPN1|SOD2
Cellular Component	transcription regulator complex	-2.07342	49	4	1017|1991|2099|6772	CDK2|ELANE|ESR1|STAT1
Molecular Function	protein serine/threonine/tyrosine kinase activity	-15.563	49	15	207|695|1017|1021|1956|3480|3643|3717|3791|3815|5588|5594|5602|5604|5747	AKT1|BTK|CDK2|CDK6|EGFR|IGF1R|INSR|JAK2|KDR|KIT|PRKCQ|MAPK1|MAPK10|MAP2K1|PTK2
Molecular Function	protein kinase activity	-15.4608	49	16	207|695|1017|1021|1956|3480|3643|3717|3791|3815|5588|5594|5602|5604|5747|7046	AKT1|BTK|CDK2|CDK6|EGFR|IGF1R|INSR|JAK2|KDR|KIT|PRKCQ|MAPK1|MAPK10|MAP2K1|PTK2|TGFBR1
Molecular Function	phosphotransferase activity, alcohol group as acceptor	-14.2694	49	16	207|695|1017|1021|1956|3480|3643|3717|3791|3815|5588|5594|5602|5604|5747|7046	AKT1|BTK|CDK2|CDK6|EGFR|IGF1R|INSR|JAK2|KDR|KIT|PRKCQ|MAPK1|MAPK10|MAP2K1|PTK2|TGFBR1
Molecular Function	kinase activity	-13.7343	49	16	207|695|1017|1021|1956|3480|3643|3717|3791|3815|5588|5594|5602|5604|5747|7046	AKT1|BTK|CDK2|CDK6|EGFR|IGF1R|INSR|JAK2|KDR|KIT|PRKCQ|MAPK1|MAPK10|MAP2K1|PTK2|TGFBR1
Molecular Function	protein tyrosine kinase activity	-11.9881	49	9	695|1956|3480|3643|3717|3791|3815|5604|5747	BTK|EGFR|IGF1R|INSR|JAK2|KDR|KIT|MAP2K1|PTK2
Molecular Function	protein serine/threonine kinase activity	-7.56095	49	9	207|1017|1021|1956|5588|5594|5602|5604|7046	AKT1|CDK2|CDK6|EGFR|PRKCQ|MAPK1|MAPK10|MAP2K1|TGFBR1
Molecular Function	protein serine kinase activity	-5.73598	49	7	207|1017|1021|5588|5594|5602|5604	AKT1|CDK2|CDK6|PRKCQ|MAPK1|MAPK10|MAP2K1
Molecular Function	MAP kinase kinase activity	-5.49211	49	3	5594|5602|5604	MAPK1|MAPK10|MAP2K1
Molecular Function	hormone binding	-9.99879	49	7	367|1956|2908|3480|3643|6462|7276	AR|EGFR|NR3C1|IGF1R|INSR|SHBG|TTR
Molecular Function	transmembrane receptor protein kinase activity	-8.47144	49	6	1956|3480|3643|3791|3815|7046	EGFR|IGF1R|INSR|KDR|KIT|TGFBR1
Molecular Function	transmembrane receptor protein tyrosine kinase activity	-7.33195	49	5	1956|3480|3643|3791|3815	EGFR|IGF1R|INSR|KDR|KIT
Molecular Function	insulin receptor substrate binding	-6.32065	49	3	3480|3643|3717	IGF1R|INSR|JAK2
Molecular Function	growth factor binding	-5.61683	49	5	1956|3480|3643|3791|7046	EGFR|IGF1R|INSR|KDR|TGFBR1
Molecular Function	phosphatidylinositol 3-kinase binding	-4.84649	49	3	3480|3643|3717	IGF1R|INSR|JAK2
Molecular Function	nitric-oxide synthase regulator activity	-9.67102	49	4	207|1956|2099|3320	AKT1|EGFR|ESR1|HSP90AA1
Molecular Function	kinase binding	-6.43065	49	10	207|834|1956|2099|2908|3320|3717|5340|5747|5770	AKT1|CASP1|EGFR|ESR1|NR3C1|HSP90AA1|JAK2|PLG|PTK2|PTPN1
Molecular Function	protein kinase binding	-3.93313	49	7	207|2099|2908|3320|3717|5747|5770	AKT1|ESR1|NR3C1|HSP90AA1|JAK2|PTK2|PTPN1
Molecular Function	lipid binding	-8.40197	49	12	207|213|367|695|2099|2147|2908|3558|4306|5009|5950|6462	AKT1|ALB|AR|BTK|ESR1|F2|NR3C1|IL2|NR3C2|OTC|RBP4|SHBG
Molecular Function	steroid binding	-6.21364	49	5	367|2099|2908|4306|6462	AR|ESR1|NR3C1|NR3C2|SHBG
Molecular Function	nuclear receptor activity	-5.80586	49	4	367|2099|2908|4306	AR|ESR1|NR3C1|NR3C2
Molecular Function	ligand-activated transcription factor activity	-5.80586	49	4	367|2099|2908|4306	AR|ESR1|NR3C1|NR3C2
Molecular Function	nuclear steroid receptor activity	-5.10057	49	3	2099|2908|4306	ESR1|NR3C1|NR3C2
Molecular Function	transcription coactivator binding	-4.41995	49	3	367|2099|6772	AR|ESR1|STAT1
Molecular Function	ATPase binding	-3.48826	49	3	367|1956|2099	AR|EGFR|ESR1
Molecular Function	transcription coregulator binding	-3.12676	49	3	367|2099|6772	AR|ESR1|STAT1
Molecular Function	serine-type endopeptidase activity	-6.41772	49	6	1991|2147|4313|4314|4318|5340	ELANE|F2|MMP2|MMP3|MMP9|PLG
Molecular Function	endopeptidase activity	-6.34523	49	8	834|836|1991|2147|4313|4314|4318|5340	CASP1|CASP3|ELANE|F2|MMP2|MMP3|MMP9|PLG
Molecular Function	serine-type peptidase activity	-6.16718	49	6	1991|2147|4313|4314|4318|5340	ELANE|F2|MMP2|MMP3|MMP9|PLG
Molecular Function	serine hydrolase activity	-6.11487	49	6	1991|2147|4313|4314|4318|5340	ELANE|F2|MMP2|MMP3|MMP9|PLG
Molecular Function	peptidase activity	-5.25019	49	8	834|836|1991|2147|4313|4314|4318|5340	CASP1|CASP3|ELANE|F2|MMP2|MMP3|MMP9|PLG
Molecular Function	metalloendopeptidase activity	-3.09254	49	3	4313|4314|4318	MMP2|MMP3|MMP9
Molecular Function	metallopeptidase activity	-2.47001	49	3	4313|4314|4318	MMP2|MMP3|MMP9
Molecular Function	protein domain specific binding	-5.85025	49	9	367|834|1017|3320|3643|3717|3815|5340|5747	AR|CASP1|CDK2|HSP90AA1|INSR|JAK2|KIT|PLG|PTK2
Molecular Function	SH2 domain binding	-4.38745	49	3	3717|3815|5747	JAK2|KIT|PTK2
Molecular Function	non-membrane spanning protein tyrosine kinase activity	-4.26521	49	3	695|3717|5747	BTK|JAK2|PTK2
Molecular Function	cytokine receptor binding	-5.29189	49	6	836|3558|3717|6772|7042|7046	CASP3|IL2|JAK2|STAT1|TGFB2|TGFBR1
Molecular Function	enzyme activator activity	-2.69877	49	5	695|834|836|3558|5604	BTK|CASP1|CASP3|IL2|MAP2K1
Molecular Function	kinase regulator activity	-2.15627	49	3	836|3558|5604	CASP3|IL2|MAP2K1
Molecular Function	insulin receptor binding	-5.21826	49	3	3479|3480|5770	IGF1|IGF1R|PTPN1
Molecular Function	phosphatase binding	-4.81346	49	5	1956|5594|5747|5770|6772	EGFR|MAPK1|PTK2|PTPN1|STAT1
Molecular Function	cell adhesion molecule binding	-4.51266	49	7	1956|3479|3791|5478|5747|5770|6772	EGFR|IGF1|KDR|PPIA|PTK2|PTPN1|STAT1
Molecular Function	protein phosphatase binding	-4.00493	49	4	1956|5747|5770|6772	EGFR|PTK2|PTPN1|STAT1
Molecular Function	cadherin binding	-2.6816	49	4	1956|3791|5770|6772	EGFR|KDR|PTPN1|STAT1
Molecular Function	protease binding	-4.1472	49	4	836|1991|3815|5265	CASP3|ELANE|KIT|SERPINA1
Molecular Function	cytokine binding	-2.79564	49	3	1991|3815|7046	ELANE|KIT|TGFBR1
Molecular Function	amino acid binding	-3.97984	49	3	4843|4846|5009	NOS2|NOS3|OTC
Molecular Function	heme binding	-2.82218	49	3	3717|4843|4846	JAK2|NOS2|NOS3
Molecular Function	organic acid binding	-2.80442	49	3	4843|4846|5009	NOS2|NOS3|OTC
Molecular Function	tetrapyrrole binding	-2.73596	49	3	3717|4843|4846	JAK2|NOS2|NOS3
Molecular Function	carboxylic acid binding	-2.55197	49	3	213|4843|4846	ALB|NOS2|NOS3
Molecular Function	calmodulin binding	-2.37527	49	3	207|4843|4846	AKT1|NOS2|NOS3
Molecular Function	integrin binding	-3.91669	49	4	3479|3791|5478|5747	IGF1|KDR|PPIA|PTK2
Molecular Function	growth factor activity	-3.8536	49	4	2147|3479|3558|7042	F2|IGF1|IL2|TGFB2
Molecular Function	receptor ligand activity	-2.93669	49	5	2147|3479|3558|7042|7276	F2|IGF1|IL2|TGFB2|TTR
Molecular Function	signaling receptor activator activity	-2.90938	49	5	2147|3479|3558|7042|7276	F2|IGF1|IL2|TGFB2|TTR
Molecular Function	signaling receptor regulator activity	-2.73322	49	5	2147|3479|3558|7042|7276	F2|IGF1|IL2|TGFB2|TTR
Molecular Function	peptide binding	-3.75453	49	5	590|3480|3643|5478|7042	BCHE|IGF1R|INSR|PPIA|TGFB2
Molecular Function	amyloid-beta binding	-3.47277	49	3	590|3643|7042	BCHE|INSR|TGFB2
Molecular Function	amide binding	-3.31342	49	5	590|3480|3643|5478|7042	BCHE|IGF1R|INSR|PPIA|TGFB2
Molecular Function	scaffold protein binding	-3.7477	49	3	3320|4846|5604	HSP90AA1|NOS3|MAP2K1
Molecular Function	protein homodimerization activity	-3.08653	49	6	207|3320|3815|4843|6772|7042	AKT1|HSP90AA1|KIT|NOS2|STAT1|TGFB2
Molecular Function	protein C-terminus binding	-2.51025	49	3	3265|3717|5604	HRAS|JAK2|MAP2K1
Molecular Function	glycosaminoglycan binding	-2.1763	49	3	1991|2147|5478	ELANE|F2|PPIA
Molecular Function	sulfur compound binding	-2.02126	49	3	1991|2147|5478	ELANE|F2|PPIA
