# Supplementary material for: Potential pharmacological mechanisms of four active compounds of Macleaya cordata extract against enteritis based on network pharmacology and molecular docking technology
Source: Front Physiol. 2023 May 2;14:1175227. doi: 10.3389/fphys.2023.1175227 (PMC10185776; doi:10.3389/fphys.2023.1175227)
Supplement: Supplementary file 4 [file Table1.XLSX]

## Sheet: 269 targets of MCE
Name	Uniplot	Gene Name
Bone morphogenetic protein 2	BMP2_HUMAN	BMP2
Androgen receptor	ANDR_HUMAN	AR
Aldo-keto reductase family 1 member C3	AK1C3_HUMAN	AKR1C3
Cholinesterase	CHLE_HUMAN	BCHE
Peptidyl-prolyl cis-trans isomerase A	P62937	PPIA
Steryl-sulfatase	STS_HUMAN	STS
Apolipoprotein A-II	APOA2_HUMAN	APOA2
Aldo-keto reductase family 1 member C2	AK1C2_HUMAN	AKR1C2
Estrogen receptor	ESR1_HUMAN	ESR1
Serum albumin	ALBU_HUMAN	ALB
Carbonic anhydrase 2	CAH2_HUMAN	CA2
Collagenase 3	MMP13_HUMAN	MMP13
Cytochrome P450 19A1	P11511	CYP19A1
Aldose reductase	ALDR_HUMAN	AKR1B1
Transthyretin	TTHY_HUMAN	TTR
Bile salt sulfotransferase	Q06520	SULT2A1
Glutathione reductase, mitochondrial	P00390	GSR
Progesterone receptor	PRGR_HUMAN	PGR
Nitric oxide synthase, endothelial	NOS3_HUMAN	NOS3
Dual specificity protein phosphatase 6	DUS6_HUMAN	DUSP6
Cell division protein kinase 2	P24941	CDK2
Serine/threonine-protein phosphatase 5	P53041	PPP5C
Sex hormone-binding globulin	SHBG_HUMAN	SHBG
Cyclin-A2	CCNA2_HUMAN	CCNA2
Sorbitol dehydrogenase	DHSO_HUMAN	SORD
Serine/threonine-protein kinase Chk1	CHK1_HUMAN	CHEK1
Retinoic acid receptor RXR-alpha	RXRA_HUMAN	RXRA
Mineralocorticoid receptor	MCR_HUMAN	NR3C2
Beta-secretase 1	BACE1_HUMAN	BACE1
Epidermal growth factor receptor	EGFR_HUMAN	EGFR
C-1-tetrahydrofolate synthase, cytoplasmic	P11586	MTHFD1
Ribosyldihydronicotinamide dehydrogenase [quinone]	NQO2_HUMAN	NQO2
Caspase-3	CASP3_HUMAN	CASP3
Branched-chain-amino-acid aminotransferase, mitochondrial	O15382	BCAT2
cAMP-specific 3,5-cyclic phosphodiesterase 4D	PDE4D_HUMAN	PDE4D
Mitogen-activated protein kinase 8	MK08_HUMAN	MAPK8
cAMP-dependent protein kinase catalytic subunit alpha	P00517	PRKACA
Prothrombin	THRB_HUMAN	F2
Thymidylate synthase	TYSY_HUMAN	TYMS
Annexin A5	ANXA5_HUMAN	ANXA5
Mitogen-activated protein kinase 10	MK10_HUMAN	MAPK10
Vitamin D-binding protein	VTDB_HUMAN	GC
Mitogen-activated protein kinase 14	Q16539	MAPK14
Aldo-keto reductase family 1 member C1	Q04828	AKR1C1
Tyrosine-protein phosphatase non-receptor type 1	PTN1_HUMAN	PTPN1
Tyrosyl-tRNA synthetase, cytoplasmic	P54577	YARS1
Proto-oncogene tyrosine-protein kinase Src	SRC_HUMAN	SRC
Estradiol 17-beta-dehydrogenase 1	P14061	HSD17B1
Alcohol dehydrogenase 1C	P00326	ADH1C
Placenta growth factor	PLGF_HUMAN	PGF
Heat shock protein HSP 90-alpha	HS90A_HUMAN	HSP90AA1
Catenin alpha-1	CTNA1_HUMAN	CTNNA1
Vascular endothelial growth factor receptor 2	P35968	KDR
Ephrin type-B receptor 4	EPHB4_HUMAN	EPHB4
Neutrophil collagenase	MMP8_HUMAN	MMP8
Corticosteroid 11-beta-dehydrogenase isozyme 1	DHI1_HUMAN	HSD11B1
cGMP-inhibited 3,5-cyclic phosphodiesterase B	PDE3B_HUMAN	PDE3B
Dipeptidyl peptidase 4	DPP4_HUMAN	DPP4
TGF-beta receptor type-1	TGFR1_HUMAN	TGFBR1
Kinesin-like protein KIF11	KIF11_HUMAN	KIF11
Macrophage metalloelastase	MMP12_HUMAN	MMP12
Alpha-tocopherol transfer protein	P49638	TTPA
Coagulation factor X	FA10_HUMAN	F10
Nicotinamide mononucleotide adenylyltransferase 1	Q9HAN9	NMNAT1
Peptidyl-prolyl cis-trans isomerase FKBP1A	FKB1A_HUMAN	FKBP1A
Tyrosine-protein phosphatase non-receptor type 11	PTN11_HUMAN	PTPN11
Adenosine kinase	P55263	ADK
Cell division protein kinase 6	CDK6_HUMAN	CDK6
Alcohol dehydrogenase class-3	ADHX_HUMAN	ADH5
Oxysterols receptor LXR-alpha	NR1H3_HUMAN	NR1H3
Stromelysin-1	MMP3_HUMAN	MMP3
Histone deacetylase 8	HDAC8_HUMAN	HDAC8
Phosphoenolpyruvate carboxykinase, cytosolic [GTP]	P35558	PCK1
Prostatic acid phosphatase	PPAP_HUMAN	ACP3
Superoxide dismutase [Mn], mitochondrial	P04179	SOD2
Amine oxidase [flavin-containing] B	AOFB_HUMAN	MAOB
Epoxide hydrolase 2	HYES_HUMAN	EPHX2
Dihydroorotate dehydrogenase, mitochondrial	PYRD_HUMAN	DHODH
Sulfotransferase family cytosolic 2B member 1	O00204	SULT2B1
3-phosphoinositide-dependent protein kinase 1	PDPK1_HUMAN	PDPK1
Glutathione S-transferase A1	P08263	GSTA1
Insulin-like growth factor 1 receptor	IGF1R_HUMAN	IGF1R
SEC14-like protein 2	O76054	SEC14L2
Receptor tyrosine-protein kinase erbB-4	ERBB4_HUMAN	ERBB4
cAMP-specific 3,5-cyclic phosphodiesterase 4B	PDE4B_HUMAN	PDE4B
Alpha-1-antitrypsin	A1AT_HUMAN	SERPINA1
cGMP-specific 3,5-cyclic phosphodiesterase	PDE5A_HUMAN	PDE5A
Oxysterols receptor LXR-beta	NR1H2_HUMAN	NR1H2
Fatty acid-binding protein, heart	FABPH_HUMAN	FABP3
Dihydrofolate reductase	DYR_HUMAN	DHFR
S-methyl-5-thioadenosine phosphorylase	Q13126	MTAP
Retinol-binding protein 4	RET4_HUMAN	RBP4
Proto-oncogene tyrosine-protein kinase LCK	LCK_HUMAN	LCK
Phenylalanine-4-hydroxylase	PH4H_HUMAN	PAH
Tyrosine-protein kinase HCK	HCK_HUMAN	HCK
Ferrochelatase, mitochondrial	P22830	FECH
Gastrotropin	FABP6_HUMAN	FABP6
Tyrosine-protein kinase JAK2	JAK2_HUMAN	JAK2
Thyroid hormone receptor beta	P10828	THRB
Tyrosine-protein kinase JAK3	JAK3_HUMAN	JAK3
Renin	RENI_HUMAN	REN
Ganglioside GM2 activator	P17900	GM2A
Bifunctional 3-phosphoadenosine 5-phosphosulfate synthetase 1	O43252	PAPSS1
Medium-chain specific acyl-CoA dehydrogenase, mitochondrial	ACADM_HUMAN	ACADM
Fatty acid-binding protein, adipocyte	FABP4_HUMAN	FABP4
Bile acid receptor	NR1H4_HUMAN	NR1H4
Glutathione S-transferase P	GSTP1_HUMAN	GSTP1
Thyroid hormone receptor alpha	P10827	THRA
Hepatocyte nuclear factor 4-gamma	Q14541	HNF4G
Focal adhesion kinase 1	FAK1_HUMAN	PTK2
Cytochrome P450 2C8	CP2C8_HUMAN	CYP2C8
Glucocorticoid receptor	GCR_HUMAN	NR3C1
72 kDa type IV collagenase	MMP2_HUMAN	MMP2
Tyrosine-protein kinase ITK/TSK	Q08881	ITK
Nuclear receptor subfamily 1 group I member 2	NR1I2_HUMAN	NR1I2
Fatty acid-binding protein, brain	FABP7_HUMAN	FABP7
Estrogen sulfotransferase	ST1E1_HUMAN	SULT1E1
Angiopoietin-1 receptor	TIE2_HUMAN	TEK
Cellular retinoic acid-binding protein 2	P29373	CRABP2
Protein S100-A9	S10A9_HUMAN	S100A9
Basic fibroblast growth factor receptor 1	FGFR1_HUMAN	FGFR1
Protein-glutamine gamma-glutamyltransferase E	TGM3_HUMAN	TGM3
Retinoic acid receptor alpha	RARA_HUMAN	RARA
Arginase-1	ARGI1_HUMAN	ARG1
Trafficking protein particle complex subunit 3	O43617	TRAPPC3
Phospholipase A2, membrane associated	P14555	PLA2G2A
S-adenosylmethionine decarboxylase proenzyme	DCAM_HUMAN	AMD1
Deoxyuridine 5-triphosphate nucleotidohydrolase, mitochondrial	DUT_HUMAN	DUT
Betaine--homocysteine S-methyltransferase 1	Q93088	BHMT
Leukocyte elastase	ELNE_HUMAN	ELANE
Serine--pyruvate aminotransferase	SPYA_HUMAN	AGXT
Histone-lysine N-methyltransferase SETD7	SETD7_HUMAN	SETD7
Thymidylate kinase	KTHY_HUMAN	DTYMK
MAP kinase-activated protein kinase 2	P49137	MAPKAPK2
Mitogen-activated protein kinase 1	MK01_HUMAN	MAPK1
Vitamin D3 receptor	VDR_HUMAN	VDR
Proto-oncogene tyrosine-protein kinase ABL1	P00519	ABL1
Neprilysin	NEP_HUMAN	MME
C-C motif chemokine 5	CCL5_HUMAN	CCL5
Dipeptidase 1	DPEP1_HUMAN	DPEP1
Ornithine aminotransferase, mitochondrial	OAT_HUMAN	OAT
Retinoic acid receptor gamma	RARG_HUMAN	RARG
Interleukin-2	IL2_HUMAN	IL2
Leukotriene A-4 hydrolase	LKHA4_HUMAN	LTA4H
ADP-ribosyl cyclase 2	BST1_HUMAN	BST1
Glutathione S-transferase A3	Q16772	GSTA3
[Pyruvate dehydrogenase [lipoamide]] kinase isozyme 2, mitochondrial	PDK2_HUMAN	PDK2
Flavin reductase	P30043	BLVRB
Histo-blood group ABO system transferase	P16442	ABO
Dual specificity mitogen-activated protein kinase kinase 1	MP2K1_HUMAN	MAP2K1
Chymase	CMA1_HUMAN	CMA1
Neutrophil gelatinase-associated lipocalin	NGAL_HUMAN	LCN2
Glutathione S-transferase Mu 1	GSTM1_HUMAN	GSTM1
Glutamate carboxypeptidase 2	FOLH1_HUMAN	FOLH1
Serine/threonine-protein phosphatase PP1-gamma catalytic subunit	P36873	PPP1CC
Retinoic acid receptor beta	RARB_HUMAN	RARB
Histamine N-methyltransferase	P50135	HNMT
Lactoylglutathione lyase	LGUL_HUMAN	GLO1
Eukaryotic translation initiation factor 4E	P06730	EIF4E
Histone acetyltransferase PCAF	Q92831	KAT2B
Cytochrome P450 2C9	CP2C9_HUMAN	CYP2C9
Insulin receptor	INSR_HUMAN	INSR
Hypoxanthine-guanine phosphoribosyltransferase	P00492	HPRT1
Retinoic acid receptor RXR-beta	RXRB_HUMAN	RXRB
3-hydroxy-3-methylglutaryl-coenzyme A reductase	HMDH_HUMAN	HMGCR
Peroxisome proliferator-activated receptor delta	PPARD_HUMAN	PPARD
Pancreatic alpha-amylase	AMYP_HUMAN	AMY2A
Glutathione S-transferase Mu 2	GSTM2_HUMAN	GSTM2
Cathepsin K	CATK_HUMAN	CTSK
Phenylethanolamine N-methyltransferase	PNMT_HUMAN	PNMT
Hydroxyacyl-coenzyme A dehydrogenase, mitochondrial	Q16836	HADH
Histidine triad nucleotide-binding protein 1	HINT1_HUMAN	HINT1
Peroxisome proliferator-activated receptor gamma	PPARG_HUMAN	PPARG
Deoxycytidine kinase	DCK_HUMAN	DCK
Caspase-1	CASP1_HUMAN	CASP1
L-serine dehydratase	P20132	SDS
Histone-lysine N-methyltransferase, H3 lysine-79 specific	Q8TEK3	DOT1L
Ornithine carbamoyltransferase, mitochondrial	P00480	OTC
tRNA (cytosine-5-)-methyltransferase	O14717	TRDMT1
Nuclear receptor ROR-alpha	RORA_HUMAN	RORA
Fibrinogen gamma chain	FIBG_HUMAN	FGG
Ras-related protein Rap-2a	P10114	RAP2A
Glutathione S-transferase theta-2	GSTT2_HUMAN	GSTT2B
Trifunctional purine biosynthetic protein adenosine-3	PUR2_HUMAN	GART
Peptidyl-prolyl cis-trans isomerase FKBP1B	FKB1B_HUMAN	FKBP1B
Riboflavin kinase	Q969G6	RFK
FK506-binding protein 3	FKBP3_HUMAN	FKBP3
Mast/stem cell growth factor receptor	KIT_HUMAN	KIT
Maleylacetoacetate isomerase	O43708	GSTZ1
GMP reductase 1	GMPR1_HUMAN	GMPR
Endothelial protein C receptor	EPCR_HUMAN	PROCR
Apoptotic protease-activating factor 1	APAF_HUMAN	APAF1
Sepiapterin reductase	P35270	SPR
Death-associated protein kinase 1	DAPK1_HUMAN	DAPK1
Complement factor D	CFAD_HUMAN	CFD
Macrophage migration inhibitory factor	MIF_HUMAN	MIF
Liver carboxylesterase 1	EST1_HUMAN	CES1
Baculoviral IAP repeat-containing protein 4	XIAP_HUMAN	XIAP
Hepatocyte growth factor receptor	MET_HUMAN	MET
Cytidine deaminase	CDD_HUMAN	CDA
Heat shock cognate 71 kDa protein	P11142	HSPA8
Glycogen synthase kinase-3 beta	GSK3B_HUMAN	GSK3B
Adenine phosphoribosyltransferase	P07741	APRT
Thymidine kinase, cytosolic	P04183	TK1
Chitotriosidase-1	Q13231	CHIT1
Cathepsin G	CATG_HUMAN	CTSG
Insulin-like growth factor IA	P01343	IGF1
Glycogen phosphorylase, liver form	P06737	PYGL
Farnesyl pyrophosphate synthetase	FPPS_HUMAN	FDPS
Signal transducer and activator of transcription 1-alpha/beta	STAT1_HUMAN	STAT1
Cathepsin S	CATS_HUMAN	CTSS
CD209 antigen	CD209_HUMAN	CD209
Peroxisome proliferator-activated receptor alpha	PPARA_HUMAN	PPARA
Baculoviral IAP repeat-containing protein 7	Q96CA5	BIRC7
Heat shock protein homolog SSE1	P32589	SSE1
Matrix metalloproteinase-9	MMP9_HUMAN	MMP9
Glucose-6-phosphate 1-dehydrogenase	G6PD_HUMAN	G6PD
Uridine-cytidine kinase 2	Q9BZX2	UCK2
5(3)-deoxyribonucleotidase, mitochondrial	Q9NPB1	NT5M
Coagulation factor XI	FA11_HUMAN	F11
ADP-ribosylation factor-like protein 5A	Q9Y689	ARL5A
Scavenger mRNA-decapping enzyme DcpS	Q96C86	DCPS
ADAM 33	ADA33_HUMAN	ADAM33
Antigen peptide transporter 1	Q03518	TAP1
Nicotinamide mononucleotide adenylyltransferase 3	Q96T66	NMNAT3
Spliceosome RNA helicase BAT1	Q13838	DDX39B
Ras-related C3 botulinum toxin substrate 1	RAC1_HUMAN	RAC1
6-phosphofructo-2-kinase/fructose-2,6-biphosphatase 1	P07953	Pfkfb1
Ras-related protein Rab-5A	RAB5A_HUMAN	RAB5A
RAC-alpha serine/threonine-protein kinase	AKT1_HUMAN	AKT1
Sulfotransferase 1A1	ST1A1_HUMAN	SULT1A1
Adenylate kinase isoenzyme 1	P00568	AK1
UDP-N-acetylhexosamine pyrophosphorylase	Q16222	UAP1
Proto-oncogene serine/threonine-protein kinase Pim-1	PIM1_HUMAN	PIM1
Plasminogen	P00747	PLG
Angiogenin	ANGI_HUMAN	ANG
Glucosylceramidase	GLCM_HUMAN	GBA
Coagulation factor VII	FA7_HUMAN	F7
Steroid hormone receptor ERR1	P11474	ESRRA
Disintegrin and metalloproteinase domain-containing protein 17	P78536	ADAM17
Phosphatidylinositol-4,5-bisphosphate 3-kinase catalytic subunit gamma isoform	PK3CG_HUMAN	PIK3CG
Estrogen-related receptor gamma	ERR3_HUMAN	ESRRG
Interferon-stimulated gene 20 kDa protein	ISG20_HUMAN	ISG20
Inosine-5-monophosphate dehydrogenase 2	IMDH2_HUMAN	IMPDH2
Dual specificity protein kinase CLK1	CLK1_HUMAN	CLK1
Protein-arginine deiminase type-4	PADI4_HUMAN	PADI4
Cathepsin F	Q9UBX1	CTSF
Kynurenine--oxoglutarate transaminase 1	KAT1_HUMAN	KYAT1
Endoplasmic reticulum mannosyl-oligosaccharide 1,2-alpha-mannosidase	Q9UKM7	MAN1B1
Non-secretory ribonuclease	P10153	RNASE2
Transforming growth factor beta-2	TGFB2_HUMAN	TGFB2
Nitric oxide synthase, inducible	NOS2_HUMAN	NOS2
Inositol-trisphosphate 3-kinase A	P23677	ITPKA
Bifunctional purine biosynthesis protein PURH	PUR9_HUMAN	ATIC
GMP reductase 2	Q9P2T1	GMPR2
Rho-related GTP-binding protein RhoE	P61587	RND3
Early endosome antigen 1	Q15075	EEA1
GTPase HRas	RASH_HUMAN	HRAS
Tyrosine-protein kinase BTK	BTK_HUMAN	BTK
Estrogen receptor beta	ESR2_HUMAN	ESR2
Peroxiredoxin-2	P32119	PRDX2
Zinc-alpha-2-glycoprotein	ZA2G_HUMAN	AZGP1
T-cell surface glycoprotein CD1a	CD1A_HUMAN	CD1A
Eosinophil cationic protein	P12724	RNASE3
Triosephosphate isomerase	TPIS_HUMAN	TPI1
Cystathionine beta-synthase	P35520	CBS
Protein kinase C theta type	KPCT_HUMAN	PRKCQ
Tyrosine-protein kinase ZAP-70	ZAP70_HUMAN	ZAP70
Isovaleryl-CoA dehydrogenase, mitochondrial	P26440	IVD
