# Supplementary material for: Potential pharmacological mechanisms of four active compounds of Macleaya cordata extract against enteritis based on network pharmacology and molecular docking technology
Source: Front Physiol. 2023 May 2;14:1175227. doi: 10.3389/fphys.2023.1175227 (PMC10185776; doi:10.3389/fphys.2023.1175227)
Supplement: Supplementary file 5 [file Table5.xlsx]

## Sheet: The results of KEGG analysis
Description	LogP	#GeneInHitList	#GeneInGOAndHitList	GeneID	Hits
Pathways in cancer	-30.4857	49	25	207|367|836|1017|1021|1956|2099|2147|3265|3320|3479|3480|3558|3717|3815|4313|4318|4843|5594|5602|5604|5747|6772|7042|7046	AKT1|AR|CASP3|CDK2|CDK6|EGFR|ESR1|F2|HRAS|HSP90AA1|IGF1|IGF1R|IL2|JAK2|KIT|MMP2|MMP9|NOS2|MAPK1|MAPK10|MAP2K1|PTK2|STAT1|TGFB2|TGFBR1
PI3K-Akt signaling pathway	-20.3286	49	17	207|1017|1021|1956|3265|3320|3479|3480|3558|3643|3717|3791|3815|4846|5594|5604|5747	AKT1|CDK2|CDK6|EGFR|HRAS|HSP90AA1|IGF1|IGF1R|IL2|INSR|JAK2|KDR|KIT|NOS3|MAPK1|MAP2K1|PTK2
FoxO signaling pathway	-19.6189	49	13	207|1017|1956|3265|3479|3480|3643|5594|5602|5604|6648|7042|7046	AKT1|CDK2|EGFR|HRAS|IGF1|IGF1R|INSR|MAPK1|MAPK10|MAP2K1|SOD2|TGFB2|TGFBR1
Prostate cancer	-19.3023	49	12	207|367|1017|1956|3265|3320|3479|3480|4314|4318|5594|5604	AKT1|AR|CDK2|EGFR|HRAS|HSP90AA1|IGF1|IGF1R|MMP3|MMP9|MAPK1|MAP2K1
Endocrine resistance	-19.246	49	12	207|1956|2099|3265|3479|3480|4313|4318|5594|5602|5604|5747	AKT1|EGFR|ESR1|HRAS|IGF1|IGF1R|MMP2|MMP9|MAPK1|MAPK10|MAP2K1|PTK2
Proteoglycans in cancer	-18.8116	49	14	207|836|1956|2099|3265|3479|3480|3791|4313|4318|5594|5604|5747|7042	AKT1|CASP3|EGFR|ESR1|HRAS|IGF1|IGF1R|KDR|MMP2|MMP9|MAPK1|MAP2K1|PTK2|TGFB2
MAPK signaling pathway	-16.6007	49	14	207|836|1956|3265|3479|3480|3643|3791|3815|5594|5602|5604|7042|7046	AKT1|CASP3|EGFR|HRAS|IGF1|IGF1R|INSR|KDR|KIT|MAPK1|MAPK10|MAP2K1|TGFB2|TGFBR1
Relaxin signaling pathway	-15.8477	49	11	207|1956|3265|4313|4318|4843|4846|5594|5602|5604|7046	AKT1|EGFR|HRAS|MMP2|MMP9|NOS2|NOS3|MAPK1|MAPK10|MAP2K1|TGFBR1
Pancreatic cancer	-14.3279	49	9	207|1021|1956|5594|5602|5604|6772|7042|7046	AKT1|CDK6|EGFR|MAPK1|MAPK10|MAP2K1|STAT1|TGFB2|TGFBR1
EGFR tyrosine kinase inhibitor resistance	-14.1697	49	9	207|1956|3265|3479|3480|3717|3791|5594|5604	AKT1|EGFR|HRAS|IGF1|IGF1R|JAK2|KDR|MAPK1|MAP2K1
Colorectal cancer	-13.8241	49	9	207|836|1956|3265|5594|5602|5604|7042|7046	AKT1|CASP3|EGFR|HRAS|MAPK1|MAPK10|MAP2K1|TGFB2|TGFBR1
Estrogen signaling pathway	-13.696	49	10	207|1956|2099|3265|3320|4313|4318|4846|5594|5604	AKT1|EGFR|ESR1|HRAS|HSP90AA1|MMP2|MMP9|NOS3|MAPK1|MAP2K1
Breast cancer	-13.4171	49	10	207|1021|1956|2099|3265|3479|3480|3815|5594|5604	AKT1|CDK6|EGFR|ESR1|HRAS|IGF1|IGF1R|KIT|MAPK1|MAP2K1
Ras signaling pathway	-13.0098	49	11	207|1956|3265|3479|3480|3643|3791|3815|5594|5602|5604	AKT1|EGFR|HRAS|IGF1|IGF1R|INSR|KDR|KIT|MAPK1|MAPK10|MAP2K1
HIF-1 signaling pathway	-12.8689	49	9	207|1956|3479|3480|3643|4843|4846|5594|5604	AKT1|EGFR|IGF1|IGF1R|INSR|NOS2|NOS3|MAPK1|MAP2K1
Prolactin signaling pathway	-12.6373	49	8	207|2099|3265|3717|5594|5602|5604|6772	AKT1|ESR1|HRAS|JAK2|MAPK1|MAPK10|MAP2K1|STAT1
Melanoma	-12.5353	49	8	207|1021|1956|3265|3479|3480|5594|5604	AKT1|CDK6|EGFR|HRAS|IGF1|IGF1R|MAPK1|MAP2K1
Growth hormone synthesis, secretion and action	-12.5184	49	9	207|3265|3479|3717|5594|5602|5604|5747|6772	AKT1|HRAS|IGF1|JAK2|MAPK1|MAPK10|MAP2K1|PTK2|STAT1
Glioma	-12.3878	49	8	207|1021|1956|3265|3479|3480|5594|5604	AKT1|CDK6|EGFR|HRAS|IGF1|IGF1R|MAPK1|MAP2K1
Focal adhesion	-12.0489	49	10	207|1956|3265|3479|3480|3791|5594|5602|5604|5747	AKT1|EGFR|HRAS|IGF1|IGF1R|KDR|MAPK1|MAPK10|MAP2K1|PTK2
Rap1 signaling pathway	-11.859	49	10	207|1956|3265|3479|3480|3643|3791|3815|5594|5604	AKT1|EGFR|HRAS|IGF1|IGF1R|INSR|KDR|KIT|MAPK1|MAP2K1
PD-L1 expression and PD-1 checkpoint pathway in cancer	-11.7733	49	8	207|1956|3265|3717|5588|5594|5604|6772	AKT1|EGFR|HRAS|JAK2|PRKCQ|MAPK1|MAP2K1|STAT1
Hepatitis C	-11.4217	49	9	207|836|1017|1021|1956|3265|5594|5604|6772	AKT1|CASP3|CDK2|CDK6|EGFR|HRAS|MAPK1|MAP2K1|STAT1
Progesterone-mediated oocyte maturation	-11.2881	49	8	207|1017|3320|3479|3480|5594|5602|5604	AKT1|CDK2|HSP90AA1|IGF1|IGF1R|MAPK1|MAPK10|MAP2K1
VEGF signaling pathway	-11.2177	49	7	207|3265|3791|4846|5594|5604|5747	AKT1|HRAS|KDR|NOS3|MAPK1|MAP2K1|PTK2
Hepatocellular carcinoma	-11.156	49	9	207|1021|1956|3265|3480|5594|5604|7042|7046	AKT1|CDK6|EGFR|HRAS|IGF1R|MAPK1|MAP2K1|TGFB2|TGFBR1
Influenza A	-11.0867	49	9	207|834|836|1021|3717|5340|5594|5604|6772	AKT1|CASP1|CASP3|CDK6|JAK2|PLG|MAPK1|MAP2K1|STAT1
Kaposi sarcoma-associated herpesvirus infection	-10.5942	49	9	207|836|1021|3265|3717|5594|5602|5604|6772	AKT1|CASP3|CDK6|HRAS|JAK2|MAPK1|MAPK10|MAP2K1|STAT1
Osteoclast differentiation	-10.4875	49	8	207|695|5594|5602|5604|6772|7042|7046	AKT1|BTK|MAPK1|MAPK10|MAP2K1|STAT1|TGFB2|TGFBR1
Chronic myeloid leukemia	-10.4199	49	7	207|1021|3265|5594|5604|7042|7046	AKT1|CDK6|HRAS|MAPK1|MAP2K1|TGFB2|TGFBR1
Chemical carcinogenesis - receptor activation	-10.2497	49	9	207|367|1956|2099|3265|3320|3717|5594|5604	AKT1|AR|EGFR|ESR1|HRAS|HSP90AA1|JAK2|MAPK1|MAP2K1
Bladder cancer	-10.2424	49	6	1956|3265|4313|4318|5594|5604	EGFR|HRAS|MMP2|MMP9|MAPK1|MAP2K1
Human T-cell leukemia virus 1 infection	-10.0713	49	9	207|1017|3265|3558|5594|5602|5604|7042|7046	AKT1|CDK2|HRAS|IL2|MAPK1|MAPK10|MAP2K1|TGFB2|TGFBR1
ErbB signaling pathway	-10.071	49	7	207|1956|3265|5594|5602|5604|5747	AKT1|EGFR|HRAS|MAPK1|MAPK10|MAP2K1|PTK2
Chemical carcinogenesis - reactive oxygen species	-10.054	49	9	207|1956|3265|5594|5602|5604|5747|5770|6648	AKT1|EGFR|HRAS|MAPK1|MAPK10|MAP2K1|PTK2|PTPN1|SOD2
Phospholipase D signaling pathway	-9.98028	49	8	207|1956|2147|3265|3643|3815|5594|5604	AKT1|EGFR|F2|HRAS|INSR|KIT|MAPK1|MAP2K1
Gastric cancer	-9.95684	49	8	207|1017|1956|3265|5594|5604|7042|7046	AKT1|CDK2|EGFR|HRAS|MAPK1|MAP2K1|TGFB2|TGFBR1
Human papillomavirus infection	-9.91008	49	10	207|836|1017|1021|1956|3265|5594|5604|5747|6772	AKT1|CASP3|CDK2|CDK6|EGFR|HRAS|MAPK1|MAP2K1|PTK2|STAT1
Cellular senescence	-9.79722	49	8	207|1017|1021|3265|5594|5604|7042|7046	AKT1|CDK2|CDK6|HRAS|MAPK1|MAP2K1|TGFB2|TGFBR1
Chagas disease	-9.507	49	7	207|3558|4843|5594|5602|7042|7046	AKT1|IL2|NOS2|MAPK1|MAPK10|TGFB2|TGFBR1
T cell receptor signaling pathway	-9.44723	49	7	207|3265|3558|5588|5594|5602|5604	AKT1|HRAS|IL2|PRKCQ|MAPK1|MAPK10|MAP2K1
Fc epsilon RI signaling pathway	-8.87036	49	6	207|695|3265|5594|5602|5604	AKT1|BTK|HRAS|MAPK1|MAPK10|MAP2K1
Central carbon metabolism in cancer	-8.79299	49	6	207|1956|3265|3815|5594|5604	AKT1|EGFR|HRAS|KIT|MAPK1|MAP2K1
Non-small cell lung cancer	-8.71792	49	6	207|1021|1956|3265|5594|5604	AKT1|CDK6|EGFR|HRAS|MAPK1|MAP2K1
Insulin signaling pathway	-8.60496	49	7	207|3265|3643|5594|5602|5604|5770	AKT1|HRAS|INSR|MAPK1|MAPK10|MAP2K1|PTPN1
Apelin signaling pathway	-8.56097	49	7	207|3265|4843|4846|5594|5604|7046	AKT1|HRAS|NOS2|NOS3|MAPK1|MAP2K1|TGFBR1
Human cytomegalovirus infection	-8.53648	49	8	207|836|1021|1956|3265|5594|5604|5747	AKT1|CASP3|CDK6|EGFR|HRAS|MAPK1|MAP2K1|PTK2
Autophagy - animal	-8.51764	49	7	207|3265|3480|5588|5594|5602|5604	AKT1|HRAS|IGF1R|PRKCQ|MAPK1|MAPK10|MAP2K1
Signaling pathways regulating pluripotency of stem cells	-8.47495	49	7	207|3265|3479|3480|3717|5594|5604	AKT1|HRAS|IGF1|IGF1R|JAK2|MAPK1|MAP2K1
mTOR signaling pathway	-8.21184	49	7	207|3265|3479|3480|3643|5594|5604	AKT1|HRAS|IGF1|IGF1R|INSR|MAPK1|MAP2K1
Salmonella infection	-8.19165	49	8	207|834|836|3265|3320|5594|5602|5604	AKT1|CASP1|CASP3|HRAS|HSP90AA1|MAPK1|MAPK10|MAP2K1
GnRH signaling pathway	-8.04076	49	6	1956|3265|4313|5594|5602|5604	EGFR|HRAS|MMP2|MAPK1|MAPK10|MAP2K1
Choline metabolism in cancer	-7.90324	49	6	207|1956|3265|5594|5602|5604	AKT1|EGFR|HRAS|MAPK1|MAPK10|MAP2K1
Chemokine signaling pathway	-7.58843	49	7	207|3265|3717|5594|5604|5747|6772	AKT1|HRAS|JAK2|MAPK1|MAP2K1|PTK2|STAT1
MicroRNAs in cancer	-7.45269	49	8	836|1021|1956|3265|4318|5594|5604|7042	CASP3|CDK6|EGFR|HRAS|MMP9|MAPK1|MAP2K1|TGFB2
Endometrial cancer	-7.40714	49	5	207|1956|3265|5594|5604	AKT1|EGFR|HRAS|MAPK1|MAP2K1
Sphingolipid signaling pathway	-7.39631	49	6	207|3265|4846|5594|5602|5604	AKT1|HRAS|NOS3|MAPK1|MAPK10|MAP2K1
Thyroid hormone signaling pathway	-7.35301	49	6	207|2099|3265|5594|5604|6772	AKT1|ESR1|HRAS|MAPK1|MAP2K1|STAT1
Long-term depression	-7.33195	49	5	3265|3479|3480|5594|5604	HRAS|IGF1|IGF1R|MAPK1|MAP2K1
Human immunodeficiency virus 1 infection	-7.29321	49	7	207|836|3265|5594|5602|5604|5747	AKT1|CASP3|HRAS|MAPK1|MAPK10|MAP2K1|PTK2
Oocyte meiosis	-7.14716	49	6	367|1017|3479|3480|5594|5604	AR|CDK2|IGF1|IGF1R|MAPK1|MAP2K1
Acute myeloid leukemia	-7.08808	49	5	207|3265|3815|5594|5604	AKT1|HRAS|KIT|MAPK1|MAP2K1
Apoptosis	-7.05033	49	6	207|836|3265|5594|5602|5604	AKT1|CASP3|HRAS|MAPK1|MAPK10|MAP2K1
Renal cell carcinoma	-7.0233	49	5	207|3265|5594|5604|7042	AKT1|HRAS|MAPK1|MAP2K1|TGFB2
Alzheimer disease	-6.74026	49	8	207|836|3265|3643|4843|5594|5602|5604	AKT1|CASP3|HRAS|INSR|NOS2|MAPK1|MAPK10|MAP2K1
B cell receptor signaling pathway	-6.64494	49	5	207|695|3265|5594|5604	AKT1|BTK|HRAS|MAPK1|MAP2K1
Toll-like receptor signaling pathway	-6.12886	49	5	207|5594|5602|5604|6772	AKT1|MAPK1|MAPK10|MAP2K1|STAT1
Cholinergic synapse	-5.94996	49	5	207|3265|3717|5594|5604	AKT1|HRAS|JAK2|MAPK1|MAP2K1
Regulation of actin cytoskeleton	-5.84593	49	6	1956|2147|3265|5594|5604|5747	EGFR|F2|HRAS|MAPK1|MAP2K1|PTK2
Neurotrophin signaling pathway	-5.83879	49	5	207|3265|5594|5602|5604	AKT1|HRAS|MAPK1|MAPK10|MAP2K1
GnRH secretion	-5.44157	49	4	207|3265|5594|5604	AKT1|HRAS|MAPK1|MAP2K1
Oxytocin signaling pathway	-5.28889	49	5	1956|3265|4846|5594|5604	EGFR|HRAS|NOS3|MAPK1|MAP2K1
Cushing syndrome	-5.27518	49	5	1017|1021|1956|5594|5604	CDK2|CDK6|EGFR|MAPK1|MAP2K1
cGMP-PKG signaling pathway	-5.11753	49	5	207|3643|4846|5594|5604	AKT1|INSR|NOS3|MAPK1|MAP2K1
Gap junction	-4.88931	49	4	1956|3265|5594|5604	EGFR|HRAS|MAPK1|MAP2K1
Neutrophil extracellular trap formation	-4.84626	49	5	207|834|1991|5594|5604	AKT1|CASP1|ELANE|MAPK1|MAP2K1
Melanogenesis	-4.65276	49	4	3265|3815|5594|5604	HRAS|KIT|MAPK1|MAP2K1
Thyroid cancer	-4.5228	49	3	3265|5594|5604	HRAS|MAPK1|MAP2K1
Serotonergic synapse	-4.43128	49	4	836|3265|5594|5604	CASP3|HRAS|MAPK1|MAP2K1
Natural killer cell mediated cytotoxicity	-4.21044	49	4	836|3265|5594|5604	CASP3|HRAS|MAPK1|MAP2K1
Pathways of neurodegeneration - multiple diseases	-3.93159	49	6	836|3265|4843|5594|5602|5604	CASP3|HRAS|NOS2|MAPK1|MAPK10|MAP2K1
Long-term potentiation	-3.7477	49	3	3265|5594|5604	HRAS|MAPK1|MAP2K1
cAMP signaling pathway	-3.34017	49	4	207|5594|5602|5604	AKT1|MAPK1|MAPK10|MAP2K1
TGF-beta signaling pathway	-3.31419	49	3	5594|7042|7046	MAPK1|TGFB2|TGFBR1
Fc gamma R-mediated phagocytosis	-3.2743	49	3	207|5594|5604	AKT1|MAPK1|MAP2K1
Parathyroid hormone synthesis, secretion and action	-3.16199	49	3	1956|5594|5604	EGFR|MAPK1|MAP2K1
Vascular smooth muscle contraction	-2.8678	49	3	5588|5594|5604	PRKCQ|MAPK1|MAP2K1
Axon guidance	-2.48995	49	3	3265|5594|5747	HRAS|MAPK1|PTK2
Alcoholism	-2.45691	49	3	3265|5594|5604	HRAS|MAPK1|MAP2K1
AGE-RAGE signaling pathway in diabetic complications	-17.1069	49	11	207|836|3265|3717|4313|4846|5594|5602|6772|7042|7046	AKT1|CASP3|HRAS|JAK2|MMP2|NOS3|MAPK1|MAPK10|STAT1|TGFB2|TGFBR1
Hepatitis B	-16.5347	49	12	207|836|1017|3265|3717|4318|5594|5602|5604|6772|7042|7046	AKT1|CASP3|CDK2|HRAS|JAK2|MMP9|MAPK1|MAPK10|MAP2K1|STAT1|TGFB2|TGFBR1
Toxoplasmosis	-10.9572	49	8	207|836|3717|4843|5594|5602|6772|7042	AKT1|CASP3|JAK2|NOS2|MAPK1|MAPK10|STAT1|TGFB2
Tuberculosis	-9.30194	49	8	207|836|3717|4843|5594|5602|6772|7042	AKT1|CASP3|JAK2|NOS2|MAPK1|MAPK10|STAT1|TGFB2
Leishmaniasis	-6.78249	49	5	3717|4843|5594|6772|7042	JAK2|NOS2|MAPK1|STAT1|TGFB2
JAK-STAT signaling pathway	-6.60039	49	6	207|1956|3265|3558|3717|6772	AKT1|EGFR|HRAS|IL2|JAK2|STAT1
Herpes simplex virus 1 infection	-2.07342	49	4	207|836|3717|6772	AKT1|CASP3|JAK2|STAT1
Lipid and atherosclerosis	-16.7558	49	13	207|834|836|3265|3320|3717|4314|4318|4846|5594|5602|5747|6648	AKT1|CASP1|CASP3|HRAS|HSP90AA1|JAK2|MMP3|MMP9|NOS3|MAPK1|MAPK10|PTK2|SOD2
IL-17 signaling pathway	-9.75903	49	7	836|3320|3934|4314|4318|5594|5602	CASP3|HSP90AA1|LCN2|MMP3|MMP9|MAPK1|MAPK10
TNF signaling pathway	-9.21965	49	7	207|836|4314|4318|5594|5602|5604	AKT1|CASP3|MMP3|MMP9|MAPK1|MAPK10|MAP2K1
Pertussis	-6.81112	49	5	834|836|4843|5594|5602	CASP1|CASP3|NOS2|MAPK1|MAPK10
Pathogenic Escherichia coli infection	-4.77056	49	5	834|836|2147|5594|5602	CASP1|CASP3|F2|MAPK1|MAPK10
Non-alcoholic fatty liver disease	-3.92746	49	4	207|836|3643|5602	AKT1|CASP3|INSR|MAPK10
Epithelial cell signaling in Helicobacter pylori infection	-3.69126	49	3	836|1956|5602	CASP3|EGFR|MAPK10
Platinum drug resistance	-3.63729	49	3	207|836|5594	AKT1|CASP3|MAPK1
Alcoholic liver disease	-2.79564	49	3	207|836|5602	AKT1|CASP3|MAPK10
Prion disease	-2.00392	49	3	836|5594|5602	CASP3|MAPK1|MAPK10
Th17 cell differentiation	-11.0857	49	8	3320|3558|3717|5588|5594|5602|6772|7046	HSP90AA1|IL2|JAK2|PRKCQ|MAPK1|MAPK10|STAT1|TGFBR1
C-type lectin receptor signaling pathway	-9.44723	49	7	207|834|3265|3558|5594|5602|6772	AKT1|CASP1|HRAS|IL2|MAPK1|MAPK10|STAT1
Yersinia infection	-8.60496	49	7	207|834|3558|5594|5602|5604|5747	AKT1|CASP1|IL2|MAPK1|MAPK10|MAP2K1|PTK2
Coronavirus disease - COVID-19	-8.43205	49	8	834|1956|2147|3558|4314|5594|5602|6772	CASP1|EGFR|F2|IL2|MMP3|MAPK1|MAPK10|STAT1
Th1 and Th2 cell differentiation	-8.06919	49	6	3558|3717|5588|5594|5602|6772	IL2|JAK2|PRKCQ|MAPK1|MAPK10|STAT1
Shigellosis	-6.84102	49	7	207|834|1956|5588|5594|5602|5747	AKT1|CASP1|EGFR|PRKCQ|MAPK1|MAPK10|PTK2
Necroptosis	-6.64828	49	6	834|3320|3717|5478|5602|6772	CASP1|HSP90AA1|JAK2|PPIA|MAPK10|STAT1
NOD-like receptor signaling pathway	-4.91354	49	5	834|3320|5594|5602|6772	CASP1|HSP90AA1|MAPK1|MAPK10|STAT1
Fluid shear stress and atherosclerosis	-10.199	49	8	207|3320|3791|4313|4318|4846|5602|5747	AKT1|HSP90AA1|KDR|MMP2|MMP9|NOS3|MAPK10|PTK2
Diabetic cardiomyopathy	-8.88839	49	8	207|3643|4313|4318|4846|5602|7042|7046	AKT1|INSR|MMP2|MMP9|NOS3|MAPK10|TGFB2|TGFBR1
Leukocyte transendothelial migration	-3.07026	49	3	4313|4318|5747	MMP2|MMP9|PTK2
Longevity regulating pathway - multiple species	-9.11771	49	6	207|3265|3479|3480|3643|6648	AKT1|HRAS|IGF1|IGF1R|INSR|SOD2
Longevity regulating pathway	-8.15648	49	6	207|3265|3479|3480|3643|6648	AKT1|HRAS|IGF1|IGF1R|INSR|SOD2
Aldosterone-regulated sodium reabsorption	-6.41079	49	4	3479|3643|4306|5594	IGF1|INSR|NR3C2|MAPK1
AMPK signaling pathway	-4.35897	49	4	207|3479|3480|3643	AKT1|IGF1|IGF1R|INSR
Type II diabetes mellitus	-4.23641	49	3	3643|5594|5602	INSR|MAPK1|MAPK10
Ovarian steroidogenesis	-4.10157	49	3	3479|3480|3643	IGF1|IGF1R|INSR
Adherens junction	-8.75518	49	6	1956|3480|3643|5594|5770|7046	EGFR|IGF1R|INSR|MAPK1|PTPN1|TGFBR1
Endocytosis	-3.13308	49	4	1956|3265|3480|7046	EGFR|HRAS|IGF1R|TGFBR1
Measles	-8.56097	49	7	207|836|1017|1021|3558|5602|6772	AKT1|CASP3|CDK2|CDK6|IL2|MAPK10|STAT1
Small cell lung cancer	-8.06919	49	6	207|836|1017|1021|4843|5747	AKT1|CASP3|CDK2|CDK6|NOS2|PTK2
Epstein-Barr virus infection	-7.43698	49	7	207|695|836|1017|1021|5602|6772	AKT1|BTK|CASP3|CDK2|CDK6|MAPK10|STAT1
p53 signaling pathway	-5.21246	49	4	836|1017|1021|3479	CASP3|CDK2|CDK6|IGF1
Viral carcinogenesis	-4.69766	49	5	836|1017|1021|3265|5594	CASP3|CDK2|CDK6|HRAS|MAPK1
Cell cycle	-2.94468	49	3	1017|1021|7042	CDK2|CDK6|TGFB2
Insulin resistance	-7.64897	49	6	207|3643|4846|5588|5602|5770	AKT1|INSR|NOS3|PRKCQ|MAPK10|PTPN1
Adipocytokine signaling pathway	-5.31042	49	4	207|3717|5588|5602	AKT1|JAK2|PRKCQ|MAPK10
Inflammatory mediator regulation of TRP channels	-3.26129	49	3	3479|5588|5602	IGF1|PRKCQ|MAPK10
Arginine biosynthesis	-7.35864	49	4	383|4843|4846|5009	ARG1|NOS2|NOS3|OTC
Amoebiasis	-6.17081	49	5	383|836|4843|5747|7042	ARG1|CASP3|NOS2|PTK2|TGFB2
Arginine and proline metabolism	-4.10157	49	3	383|4843|4846	ARG1|NOS2|NOS3
Calcium signaling pathway	-3.20575	49	4	1956|3791|4843|4846	EGFR|KDR|NOS2|NOS3
Transcriptional misregulation in cancer	-6.15399	49	6	1991|3479|3480|4314|4318|5747	ELANE|IGF1|IGF1R|MMP3|MMP9|PTK2
Platelet activation	-5.75054	49	5	207|695|2147|4846|5594	AKT1|BTK|F2|NOS3|MAPK1
Inflammatory bowel disease	-3.78681	49	3	3558|6772|7042	IL2|STAT1|TGFB2
Complement and coagulation cascades	-3.44236	49	3	2147|5265|5340	F2|SERPINA1|PLG
